# Supplementary material for: Photocatalytic synthesis of 2,3-diamines from anilines and DIPEA via C–N bond cleavage and C–C bond formation
Source: Royal Society of Chemistry journal article supplement (doi:10.1039/d3gc04273a), 2023-12-05

## Supporting Information

# Photocatalytic Synthesis of 2,3-Diamines from Anilines and DIPEA via C-N Bond Cleavage and C-C Bond Formation

Yunyan Meng,<sup>§a</sup> Chunxiang Pan,<sup>§a</sup> Na Liu,<sup>a</sup> Hongjiang Li,<sup>a</sup> Zixiu Liu,<sup>a</sup> Yao Deng,<sup>a</sup> Zixiang Wei,<sup>a</sup> Jianbin Xu,<sup>\*a</sup> and Baomin Fan<sup>\*ab</sup>

<sup>a</sup> School of Chemistry and Environment, Yunnan Minzu University, Kunming, Yunnan, 650504, China

<sup>b</sup> Yunnan Key Laboratory of Chiral Functional Substance Research and Application, Yunnan Minzu University, Kunming, Yunnan, 650504, China

E-mail addresses: xujianbin@ymu.edu.cn (Dr. Jianbin Xu); adams.bmf@hotmail.com (Prof. Baomin Fan).

## Table of Contents

|                                                     |     |
|-----------------------------------------------------|-----|
| 1. General information.....                         | S3  |
| 2. General procedure for the diamine reaction ..... | S3  |
| 3. Optimization of reaction conditions .....        | S4  |
| 4. Mechanistic studies.....                         | S9  |
| 5. Stern-Volmer experiment .....                    | S13 |
| 6. Characterization data of products .....          | S14 |
| 7. Reference .....                                  | S29 |
| 8. NMR spectra.....                                 | S30 |

## 1. General information

The reactions via general procedure was carried out under an atmosphere of argon unless otherwise noted. Column chromatography was performed with silica gel (200-300 mesh) with petroleum ether/ethyl acetate and ethyl acetate as eluents. Unless otherwise noted, all other reagents were obtained from commercial suppliers and used without further purification, all solvents was dried.  $^1\text{H}$  NMR spectra were recorded using a Bruker 400 MHz instrument with tetramethylsilane (TMS) as an internal standard.  $^{13}\text{C}$  NMR spectra were obtained at 100 MHz and referenced to the internal solvent signals. Mass spectra were measured on Agilent 5977 GC-MS instrument (EI). The structures of known compounds were further corroborated by comparing their  $^1\text{H}$  NMR,  $^{13}\text{C}$  NMR data and MS data with those in literature. Some new compounds for HRMS were tested on a Q-TOF time-of-flight with Dual ESI mass spectrometer. Some high-resolution mass spectra (HRMS) were obtained by fast atom bombardment (FAB) using a double focusing magnetic sector mass spectrometer and electron impact (EI) ionization technique. Steady-state emission spectra were recorded using a Cary Eclipse Fluorescence spectrophotometer (Agilent Technologies). The light source was 20 W blue LED (454 nm, 1 W\*20, 30-50 cd/m<sup>2</sup>, made in Everlight Electronics., Ltd.); borosilicate glass Schlenk tube was used as the irradiation vessel; the distance from the light source to the irradiation vessel; 2-3 cm and no filter was used. The organic photocatalyst 4CzIPN was synthesized using reported procedures.<sup>1</sup>

## 2. General procedure for the diamine reaction

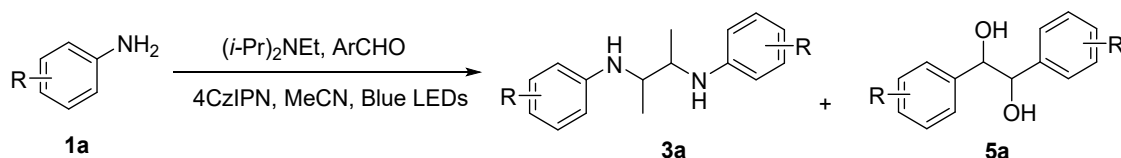

**Figure S1**

Under the protection of argon, a 25 mL Schlenk tube equipped with a magnetic stir bar was charged with 4CzIPN (23.7 mg, 0.03 mmol, 10 mol%), aniline (27.9 mg, 0.3 mmol, 1.0 equiv),  $(i\text{-Pr})_2\text{NEt}$  (77.6 mg, 0.6 mmol, 2.0 equiv), and aromatic aldehydes (31.8 mg, 0.3 mmol, 1.0 equiv), in 2.0 mL acetonitrile. The resulting mixture was stirred for 20 h under irradiation with a 20 W blue LEDs at room temperature, and cooled by a fan to keep the temperature relatively constant. The reaction was monitored by TLC. The resulting solution was concentrated in vacuum and the residue was purified by chromatography on silica gel, eluting with the mixture of ethyl acetate/petroleum ether/ethyl acetate to give the product **3a** and **5a**.

### Scale-up experiment

**12 mmol scale reaction:** Under the protection of argon, a 100 mL oven-dried reaction vessel equipped with a magnetic stir bar was charged with 4CzIPN (189.4 mg, 0.3 mmol, 2 mol%), aniline (1.1 g, 12 mmol, 1.0 equiv),  $(i\text{-Pr})_2\text{NEt}$  (3.1 g, 24 mmol, 2.0 equiv), and aromatic aldehydes (1.3 g, 12 mmol, 1.0 equiv), in 50.0 mL acetonitrile. The resulting mixture was stirred

for 20 h under irradiation with a 20 W blue LEDs at room temperature, and cooled by a fan to keep the temperature relatively constant. The reaction was monitored by TLC. The resulting solution was concentrated in vacuum and the residue was purified by chromatography on silica gel, eluting with the mixture of ethyl acetate/petroleum ether/ethyl acetate to give the product **3a** (748.8mg, 52% yield) and **5a** (590.6 mg, 46% yield)

### 3. Optimization of reaction conditions

**Table S1.** Conditions for the optimization of solvent and PC <sup>a</sup>

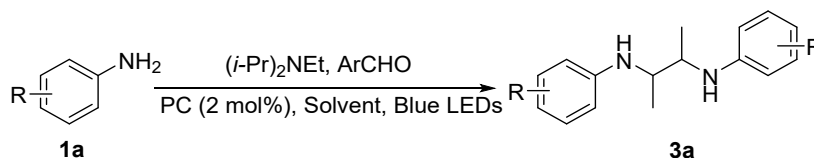

| entry | solvent            | PC (2 mol%)                      | Time (h) | Yield (%) <sup>b</sup> |
|-------|--------------------|----------------------------------|----------|------------------------|
| 1     | THF                | 4CzIPN                           | 24       | 34                     |
| 2     | CH <sub>3</sub> CN | 4CzIPN                           | 24       | 69                     |
| 3     | acetone            | 4CzIPN                           | 24       | 58                     |
| 4     | DMF                | 4CzIPN                           | 24       | 52                     |
| 5     | toluene            | 4CzIPN                           | 24       | trace                  |
| 6     | DMSO               | 4CzIPN                           | 24       | trace                  |
| 7     | 1,4-dioxane        | 4CzIPN                           | 24       | 50                     |
| 8     | DCE                | 4CzIPN                           | 24       | 65                     |
| 9     | DCM                | 4CzIPN                           | 24       | 64                     |
| 10    | EA                 | 4CzIPN                           | 24       | 28                     |
| 11    | EtOH               | 4CzIPN                           | 24       | trace                  |
| 12    | HFIP               | 4CzIPN                           | 24       | n.d.                   |
| 13    | CH <sub>3</sub> CN | 4CzPN                            | 24       | 42                     |
| 14    | CH <sub>3</sub> CN | 4CzTPN                           | 24       | 55                     |
| 15    | CH <sub>3</sub> CN | 4 <i>t</i> -BuCzIPN              | 24       | 61                     |
| 16    | CH <sub>3</sub> CN | 4DP-IPN                          | 24       | 56                     |
| 17    | CH <sub>3</sub> CN | <i>fac</i> -Ir(ppy) <sub>3</sub> | 24       | 53                     |
| 18    | CH <sub>3</sub> CN | BP                               | 24       | trace                  |
| 19    | CH <sub>3</sub> CN | Eosin Y                          | 24       | trace                  |
| 20    | CH <sub>3</sub> CN | DDQ                              | 24       | trace                  |

|                 |                    |                                      |    |       |
|-----------------|--------------------|--------------------------------------|----|-------|
| 21              | CH <sub>3</sub> CN | Ru(bpy) <sub>3</sub> Cl <sub>2</sub> | 24 | n.d.  |
| 22              | CH <sub>3</sub> CN | Riboflavine                          | 24 | n.d.  |
| 23              | CH <sub>3</sub> CN | Rhodamine B                          | 24 | trace |
| 24              | CH <sub>3</sub> CN | Xanthone                             | 24 | n.d.  |
| 25              | CH <sub>3</sub> CN | 1,4-Dicyanbenzene                    | 24 | n.d.  |
| 26 <sup>c</sup> | CH <sub>3</sub> CN | 4CzIPN                               | 48 | n.d.  |
| 27 <sup>d</sup> | CH <sub>3</sub> CN | 4CzIPN                               | 48 | n.d.  |
| 28 <sup>e</sup> | CH <sub>3</sub> CN | 4CzIPN                               | 48 | trace |

<sup>a</sup> Reaction conditions: **1a** (0.3 mmol), (*i*-Pr)<sub>2</sub>NEt (0.6 mmol), ArCHO (0.3 mmol) and photocatalyst (2 mol%) in solvent (2 mL) at room temperature in argon under a 20 W blue LEDs (460-470 nm) irradiation, unless otherwise noted. <sup>b</sup> Isolated yields, *dr* = diastereomeric ratio. <sup>c</sup> The reaction was carried out in dark. <sup>d</sup> The reaction was carried out at 70 °C. <sup>e</sup> The reaction was carried out under air atmosphere.

**Table S2.** Conditions for the optimization of 4CzIPN (mmol), (*i*-Pr)<sub>2</sub>Net (mmol) and ArCHO (mmol).<sup>a</sup>

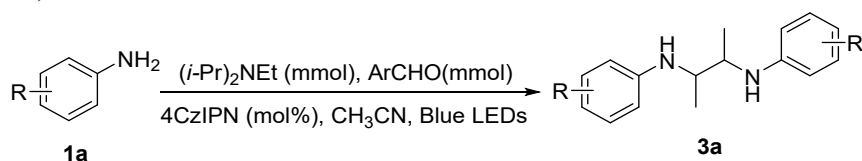

| entry           | 4CzIPN (mol%)  | ( <i>i</i> -Pr) <sub>2</sub> Net (mmol) | Time (h)  | Yield (%) <sup>b</sup> |
|-----------------|----------------|-----------------------------------------|-----------|------------------------|
| 1               | —              | 0.6 mmol                                | 48        | n.d.                   |
| 2               | 2 mol%         | 0.6 mmol                                | 24        | 69                     |
| 3               | 4 mol%         | 0.6 mmol                                | 20        | 72                     |
| 4               | 6 mol%         | 0.6 mmol                                | 20        | 78                     |
| 5               | 8 mol%         | 0.6 mmol                                | 20        | 78                     |
| <b>6</b>        | <b>10 mol%</b> | <b>0.6 mmol</b>                         | <b>15</b> | <b>82</b>              |
| 7               | 12 mol%        | 0.6 mmol                                | 20        | 62                     |
| 8               | 10 mol%        | —                                       | 48        | n.d.                   |
| 9               | 10 mol%        | 0.3 mmol                                | 20        | 42                     |
| 10              | 10 mol%        | 0.45 mmol                               | 20        | 66                     |
| 11              | 10 mol%        | 0.9 mmol                                | 20        | 62                     |
| 12 <sup>c</sup> | 10 mol%        | 0.6 mmol                                | 48        | 52                     |

|                 |         |          |    |    |
|-----------------|---------|----------|----|----|
| 13 <sup>d</sup> | 10 mol% | 0.6 mmol | 20 | 67 |
| 14 <sup>e</sup> | 10 mol% | 0.6 mmol | 20 | 59 |
| 15 <sup>f</sup> | 10 mol% | 0.6 mmol | 20 | 19 |

<sup>a</sup> Reaction conditions: **1a** (0.3 mmol), (*i*-Pr)<sub>2</sub>NEt, ArCHO (0.3 mmol), and 4CzIPN in CH<sub>3</sub>CN (2 mL) at room temperature in argon under a 20 W blue LEDs (460-470 nm) irradiation, unless otherwise noted. <sup>b</sup> Isolated yields, dr = diastereomeric ratio. <sup>c</sup> no ArCHO was added. <sup>d</sup> 0.15 mmol ArCHO was added. <sup>e</sup> 0.45 mmol ArCHO was added. <sup>f</sup> 0.60 mmol ArCHO was added.

**Table S3.** Screening of LEDs, photocatalyst (PC), and the amount of photocatalyst <sup>a</sup>.

Reaction scheme: **1a** (aniline derivative) reacts with (*i*-Pr)<sub>2</sub>NEt, ArCHO, PC (mol%), MeCN, and LEDs to produce **3a** (diamine) and **5a** (diol).

| entry | LEDs <sup>b</sup> | PC                   | PC (mol%) | Diamine yield (%) <sup>c</sup> | Diol yield (%) <sup>c</sup> |
|-------|-------------------|----------------------|-----------|--------------------------------|-----------------------------|
| 1     | Blue LEDs         | 4CzIPN               | 10 mol%   | 82                             | 78                          |
| 2     | Purple LEDs       | 4CzIPN               | 10 mol%   | 53                             | 74                          |
| 3     | Purple LEDs       | 4CzIPN               | 5 mol%    | 61                             | 69                          |
| 4     | Purple LEDs       | 4CzIPN               | 2 mol%    | 53                             | 66                          |
| 5     | Purple LEDs       | 4CzIPN               | 1 mol%    | 47                             | 63                          |
| 6     | Purple LEDs       | 4DPAIPN              | 1 mol%    | 50                             | 60                          |
| 7     | Purple LEDs       | 4DPAIPN              | 2 mol%    | 54                             | 58                          |
| 8     | Purple LEDs       | 4DPAIPN              | 5 mol%    | 56                             | 55                          |
| 9     | Purple LEDs       | Ir(ppy) <sub>3</sub> | 2 mol%    | 61                             | 69                          |
| 10    | Purple LEDs       | PTH                  | 2 mol%    | 50                             | 66                          |
| 11    | Purple LEDs       | BP                   | 2 mol%    | 47                             | 63                          |

<sup>a</sup> Reaction conditions: **1a** (0.3 mmol), (*i*-Pr)<sub>2</sub>NEt (0.6 mmol), and ArCHO (0.3 mmol) and PC in CH<sub>3</sub>CN (2 mL) at room temperature in argon under a LEDs irradiation, unless otherwise noted. <sup>b</sup> 20 W blue LED (460-470 nm), 20 W Purple LEDs (365 nm) <sup>c</sup> Isolated yields.

**Table S4.** Screening of LEDs, the amount of CH<sub>3</sub>CHO and 4CzIPN. <sup>a</sup>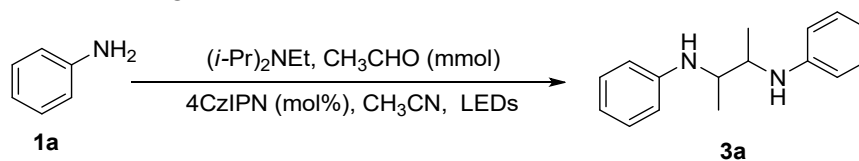

| entry          | LEDs <sup>b</sup> | 4CzIPN (mol%)  | CH <sub>3</sub> CHO (mmol) | Yield (%) <sup>c</sup> |
|----------------|-------------------|----------------|----------------------------|------------------------|
| 1              | Blue LEDs         | 2 mol%         | 0.3 mmol                   | 54                     |
| 2              | Blue LEDs         | 5 mol%         | 0.3 mmol                   | 72                     |
| <b>3</b>       | <b>Blue LEDs</b>  | <b>10 mol%</b> | <b>0.3 mmol</b>            | <b>85</b>              |
| 4              | Blue LEDs         | 10 mol%        | 0.15 mmol                  | 55                     |
| 5              | Blue LEDs         | 10 mol%        | 0.6 mmol                   | 48                     |
| 6 <sup>d</sup> | Blue LEDs         | 10 mol%        | 0.6 mmol                   | NR                     |
| 7              | Purple LEDs       | 2 mol%         | 0.3 mmol                   | 41                     |
| 8              | Purple LEDs       | 5 mol%         | 0.3 mmol                   | 46                     |
| 9              | Purple LEDs       | 10 mol%        | 0.3 mmol                   | 55                     |

<sup>a</sup> Reaction conditions: **1a** (0.3 mmol), (*i*-Pr)<sub>2</sub>NEt (0.6 mmol) CH<sub>3</sub>CHO and 4CzIPN in CH<sub>3</sub>CN (2 mL) at room temperature in argon under a irradiation, unless otherwise noted. <sup>b</sup> 20 W blue LED (460-470 nm), 20 W Purple LEDs (365 nm) <sup>c</sup> Isolated yields. <sup>d</sup> no (*i*-Pr)<sub>2</sub>NEt was added.

**Table S5.** Optimization conditions for additive and H<sub>2</sub>O<sup>a</sup>.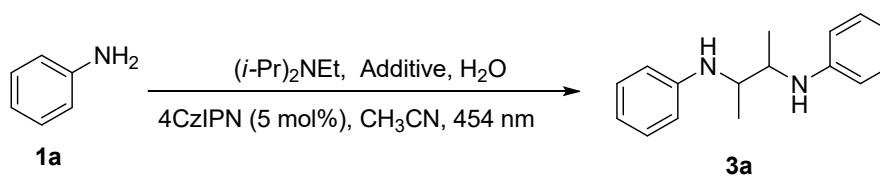

| entry | Additive                        | H <sub>2</sub> O | Time (h) | Yield (%) <sup>b</sup> |
|-------|---------------------------------|------------------|----------|------------------------|
| 1     | KPF <sub>6</sub>                | /                | 48       | 30.                    |
| 2     | CuI                             | /                | 48       | 42                     |
| 3     | Cu(OTf) <sub>2</sub>            | /                | 48       | NR                     |
| 4     | Bu <sub>4</sub> NBr             | /                | 48       | 45                     |
| 5     | Cs <sub>2</sub> CO <sub>3</sub> | 0.6 mmol         | 48       | NR                     |

|    |                    |                 |           |           |
|----|--------------------|-----------------|-----------|-----------|
| 6  | <sup>t</sup> BuOK  | 0.6 mmol        | 48        | NR        |
| 7  | <b>DABCO</b>       | <b>0.6 mmol</b> | <b>40</b> | <b>70</b> |
| 8  | quinuclidine       | /               | 60        | 36.       |
| 9  | LiBr               | /               | 60        | 18        |
| 10 | N-Methylpiperidine | /               | 60        | 26        |
| 11 | DBU                | /               | 60        | NR        |

<sup>a</sup> Reaction conditions: **1a** (0.3 mmol), (*i*-Pr)<sub>2</sub>NEt (0.6 mmol), **additive** (0.6 mmol), **H<sub>2</sub>O** (0.6 mmol) and **4CzIPN** (5 mol%) in CH<sub>3</sub>CN (2 mL) at room temperature in argon under a 20 W blue LEDs (460-470 nm) irradiation, unless otherwise noted. <sup>b</sup> Isolated yields.

**Table S6.** Screening of the amount of DABCO, H<sub>2</sub>O and 4CzIPN <sup>a</sup>

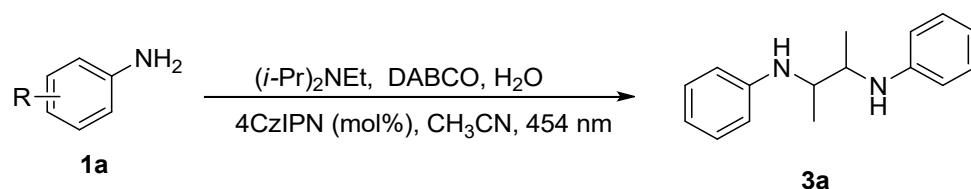

| Entry    | 4CzIPN (mol%) | DABCO (mmol) | H <sub>2</sub> O (mmol) | Diamine (yield %) <sup>b</sup> |
|----------|---------------|--------------|-------------------------|--------------------------------|
| 1        | 2             | 0.6          | /                       | 44                             |
| 2        | 5             | 0.6          | /                       | 25                             |
| 3        | 10            | 0.6          | /                       | trace                          |
| 4        | 10            | 0.3          | /                       | 28                             |
| 5        | 10            | 0.15         | /                       | 50                             |
| 6        | 2             | 0.6          | 0.3                     | 35                             |
| 7        | 2             | 0.6          | 0.6                     | 28                             |
| 8        | 5             | 0.6          | 0.3                     | 45                             |
| <b>9</b> | <b>5</b>      | <b>0.6</b>   | <b>0.6</b>              | <b>70</b>                      |
| 10       | 10            | 0.6          | 0.3                     | 15                             |
| 11       | 10            | 0.6          | 0.6                     | 20                             |

<sup>a</sup> Reaction conditions: **1a** (0.3 mmol), (*i*-Pr)<sub>2</sub>NEt (0.6 mmol), **DABCO**, **H<sub>2</sub>O** and **4CzIPN** (5 mol%) in CH<sub>3</sub>CN (2 mL) at room temperature in argon under a 20 W blue LEDs (460-470 nm) irradiation, unless otherwise noted. <sup>b</sup> Isolated yields.



**Table S7.** Screening of the amount of DACBO, ArCHO and 4CzIPN <sup>a</sup>

| Entry | 4CzIPN (mol%) | DABCO (mmol) | ArCHO (mmol) | Diamine (yield %) <sup>b</sup> |
|-------|---------------|--------------|--------------|--------------------------------|
| 1     | 2             | 0.3          | 0.15         | 44                             |
| 2     | 2             | 0.6          | 0.3          | 64                             |
| 3     | 2             | 0.6          | 0.06         | 31                             |
| 4     | 4             | 0.6          | 0.06         | 70                             |
| 5     | 6             | 0.6          | 0.06         | 56                             |
| 6     | 2             | 0.6          | 0.15         | 70                             |
| 7     | 5             | 0.3          | 0.15         | 75                             |
| 8     | 5             | 0.6          | 0.15         | 67                             |
| 9     | 5             | 0.6          | 0.06         | 75                             |

<sup>a</sup> Reaction conditions: **1a** (0.3 mmol), (*i*-Pr)<sub>2</sub>NEt (0.6 mmol), **DABCO**, **H<sub>2</sub>O** and **4CzIPN** in CH<sub>3</sub>CN (2 mL) at room temperature in argon under a 20 W blue LEDs (460-470 nm) irradiation, unless otherwise noted. <sup>b</sup> Isolated yields.

**Table S8.** Effect of photocatalyst, solvent and temperature on d.r. value. <sup>a</sup>

| entry | Solvent                           | PC     | Time (h) | Yield (%) <sup>b</sup> | d.r. <sup>c</sup> |
|-------|-----------------------------------|--------|----------|------------------------|-------------------|
| 1     | THF                               | 4CzIPN | 24       | 55                     | 2:1               |
| 2     | CH <sub>3</sub> CN                | 4CzIPN | 30       | 70                     | 2:3               |
| 3     | CH <sub>3</sub> COCH <sub>3</sub> | 4CzIPN | 24       | 58                     | 1:1               |
| 4     | DMF                               | 4CzIPN | 24       | 52                     | 2:3               |
| 5     | DMA                               | 4CzIPN | 24       | 41                     | 2:3               |
| 6     | DCE                               | 4CzIPN | 24       | 65                     | 1:2               |
| 7     | DMF:MeCN=1:1                      | 4CzIPN | 24       | 55                     | 2:3               |
| 8     | DMA:MeCN=1:1                      | 4CzIPN | 24       | 50                     | 2:3               |

|                 |                    |                                                                                            |    |     |     |
|-----------------|--------------------|--------------------------------------------------------------------------------------------|----|-----|-----|
| 9               | CH <sub>3</sub> CN | 4CzPN                                                                                      | 48 | 42  | 1:1 |
| 10              | CH <sub>3</sub> CN | 4CzTPN                                                                                     | 37 | 55  | 1:1 |
| 11              | CH <sub>3</sub> CN | 4 <i>t</i> BuCzIPN                                                                         | 48 | 42  | 1:1 |
| 12              | CH <sub>3</sub> CN | <i>fac</i> -Ir(ppy) <sub>3</sub>                                                           | 48 | 53  | 1:1 |
| 13              | CH <sub>3</sub> CN | [Ir(dF(CF <sub>3</sub> ppy) <sub>2</sub> )(5,<br>,5'-CF <sub>3</sub> -bpy)]PF <sub>6</sub> | 48 | 50  | 1:1 |
| 14 <sup>d</sup> | CH <sub>3</sub> CN | 4CzIPN                                                                                     | 48 | NR  |     |
| 15 <sup>e</sup> | CH <sub>3</sub> CN | 4CzIPN                                                                                     | 48 | 20% | 1:1 |

<sup>a</sup> Reaction conditions: **1a** (0.3 mmol), (*i*-Pr)<sub>2</sub>NEt (0.6 mmol), **ArCHO** (0.3 mmol) and **PC** (2 mol%) in solvent (2 mL) at room temperature in argon under a 20 W blue LEDs (460-470 nm) irradiation, unless otherwise noted. <sup>b</sup> Isolated yields, <sup>c</sup> *dr* = diastereomeric ratio. <sup>d</sup> T = -20 – 0°C. <sup>e</sup> T = 40 – 60°C.

## Mechanistic studies

### 4.1. Control experiment

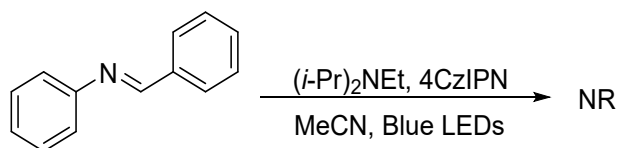

Under the protection of argon, N-benzylideneaniline (54.4 mg, 0.3 mmol, 1.0 equiv), 4CzIPN (23.7 mg, 0.03 mmol, 10 mol%), and (*i*-Pr)<sub>2</sub>NEt (77.6 mg, 0.6 mmol, 2.0 equiv), in 2.0 mL acetonitrile, were added sequentially to a 25 mL Schlenk tube equipped with a magnetic stir bar. When reaction mixture was stirred under 20 W blue LEDs irradiation at room temperature, and cooled by a fan to keep the temperature relatively constant. The reaction was monitored by TLC. The product was not detected.

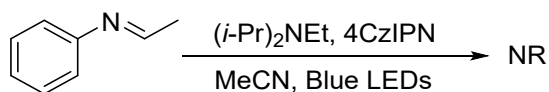

Under the protection of argon, N-phenylethanamine (35.7 mg, 0.3 mmol, 1.0 equiv), 4CzIPN (23.7 mg, 0.03 mmol, 10 mol%), and (*i*-Pr)<sub>2</sub>NEt (77.6 mg, 0.6 mmol, 2.0 equiv), in 2.0 mL acetonitrile, were added sequentially to a 25 mL Schlenk tube equipped with a magnetic stir bar. When reaction mixture was stirred under 20 W blue LEDs irradiation at room temperature, and cooled by a fan to keep the temperature relatively constant. The reaction was monitored by TLC. The products was not detected.

## 4.2. Radical-trapping experiment with 1,1-Diphenylethylene

According to general procedure 2, When 1,1-Diphenylethylene was added, the product **3a** was only a trace amount of the product **3a** was detected by GC-MS analysis, the trapped product was obtained as main product, and purified by silica gel chromatography (PE/EA = 50:1) as White solid (MW = 301.4, 58.8 mg, 0.20 mmol, 65% yield, mp:52-53 °C). <sup>1</sup>H NMR (400 MHz, Chloroform-*d*) δ 7.30 – 7.14 (m, 10H), 7.09 (dd, *J* = 8.6, 7.2 Hz, 2H), 6.64 (tt, *J* = 7.3, 1.2 Hz, 1H), 6.41 – 6.35 (m, 2H), 4.16 (t, *J* = 7.8 Hz, 1H), 3.33 (q, *J* = 6.4 Hz, 1H), 2.32 – 2.23 (m, 1H), 2.13 (dd, *J* = 8.1, 6.0 Hz, 1H), 1.18 (d, *J* = 6.2 Hz, 3H). <sup>13</sup>C NMR (100 MHz, Chloroform-*d*) δ 147.7, 145.0, 144.9, 129.5, 128.8, 128.8, 128.2, 128.2, 126.6, 126.5, 117.3, 113.6, 48.2, 46.8, 43.7, 21.3. HRMS (ESI) calcd for C<sub>12</sub>H<sub>23</sub>N, [M+H]<sup>+</sup> *m/z* 302.1903; Found: 302.1906.

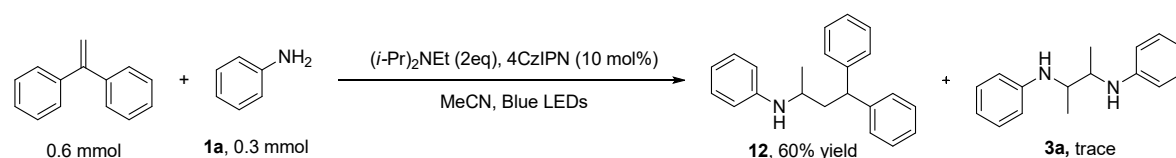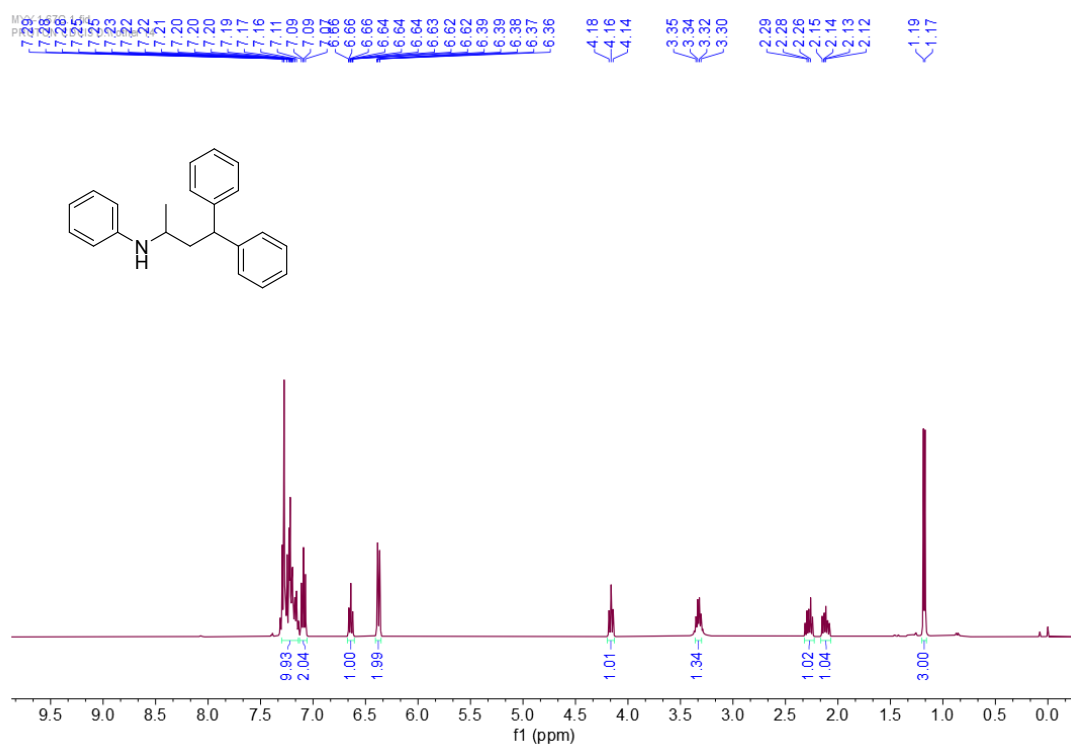

147.7  
145.0  
144.9  
129.5  
128.8  
128.8  
128.2  
128.2  
126.6  
126.5  
-117.3  
-113.6

48.2  
46.8  
43.7

-21.3

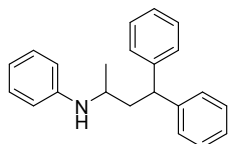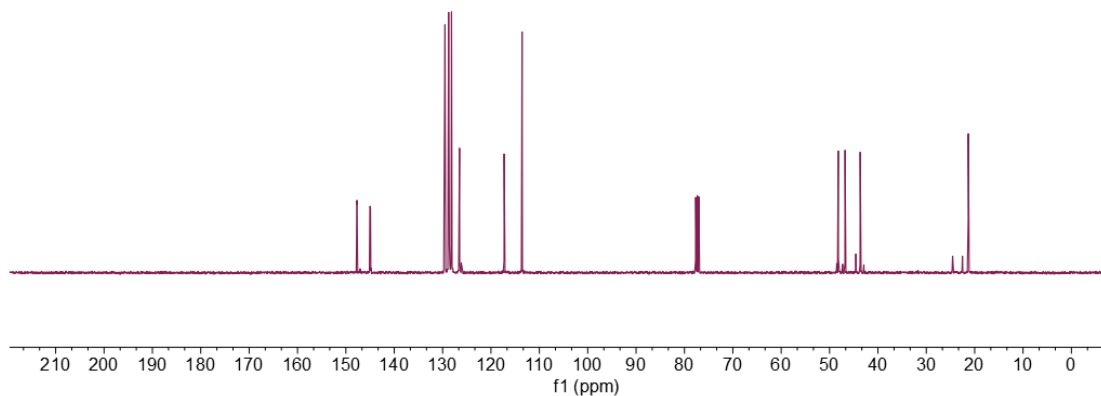

## 4. Product derivatizations

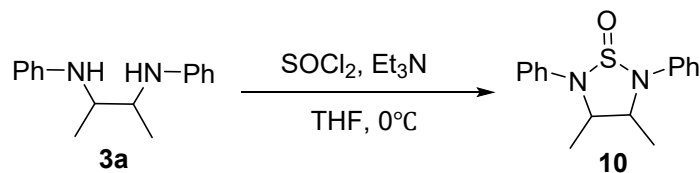

Under the protection of argon, 1,2-diamines (72.0 mg, 0.3 mmol, 1.0 equiv),  $\text{SOCl}_2$  (48 mg, 0.4 mmol, 1.5 equiv), and  $\text{Et}_3\text{N}$  (60.6 mg, 0.6 mmol, 2.0 equiv), in 2.0 mL THF. were added sequentially to a 25 mL Schlenk tube equipped with a magnetic stir bar. The resulting solution was stirred at 0 °C under argon atmosphere with TLC monitoring. The resulting solution was concentrated in vacuum and the residue was purified by chromatography on silica gel, eluting with the mixture of ethyl acetate/petroleum ether/ethyl acetate to give the product **10** (35 mg, 40% yield)<sup>2</sup>

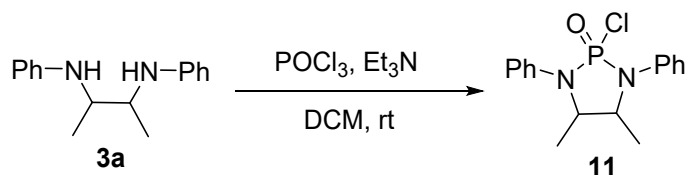

Under the protection of argon, 1,2-diamines (72.0 mg, 0.3 mmol, 1.0 equiv),  $\text{POCl}_2$  (61.2 mg, 0.4 mmol, 1.5 equiv), and  $\text{Et}_3\text{N}$  (60.6 mg, 0.6 mmol, 2.0 equiv), in 2.0 mL DCM. were added sequentially to a 25 mL Schlenk tube equipped with a magnetic stir bar. The resulting solution was stirred at room temperature under argon atmosphere with TLC monitoring. The resulting

solution was concentrated in vacuum and the residue was purified by chromatography on silica gel, eluting with the mixture of ethyl acetate/petroleum ether/ethyl acetate to give the product **11** (20 mg, 21% yield)<sup>3</sup>

## 5. Stern-Volmer experiment

**Formulation solution:** N,N-Diisopropylethylamine was dissolved in CH<sub>3</sub>CN in a 5 mL volumetric flask to set the concentration to be 0.05 mM, 0.10 mM, 0.15 mM, 0.20 mM. Photocatalyst 4CzIPN was dissolved in CH<sub>3</sub>CN (50 mL) to set the concentration to be 0.1 mM.

**Experimental procedure:** Steady-state emission spectra were recorded using a Cary Eclipse Fluorescence Spectrophotometer (Agilent Technologies) (**Figure S2**). N,N-Diisopropylethylamine was added to an CH<sub>3</sub>CN solution of 4CzIPN (0.1 mM) and made to a fixed concentration in a volumetric flask. The solutions were then transferred to a septum topped quartz cuvette. Samples were irradiated at 440 nm and area under the graph was calculated and used for determining the Stern-Volmer quenching values. A pre-weighed amount of N,N-Diisopropylethylamine was dissolved in CH<sub>3</sub>CN solution of 4CzIPN (0.1 mM) and made to fixed concentration in a volumetric flask. The solution were then transferred to a septum topped quartz cuvette. Due to competing absorption of the imine substrate, samples were irradiated at 440 nm and the emission intensity at 510 nm was used to determine the Stern-Volmer quenching values.

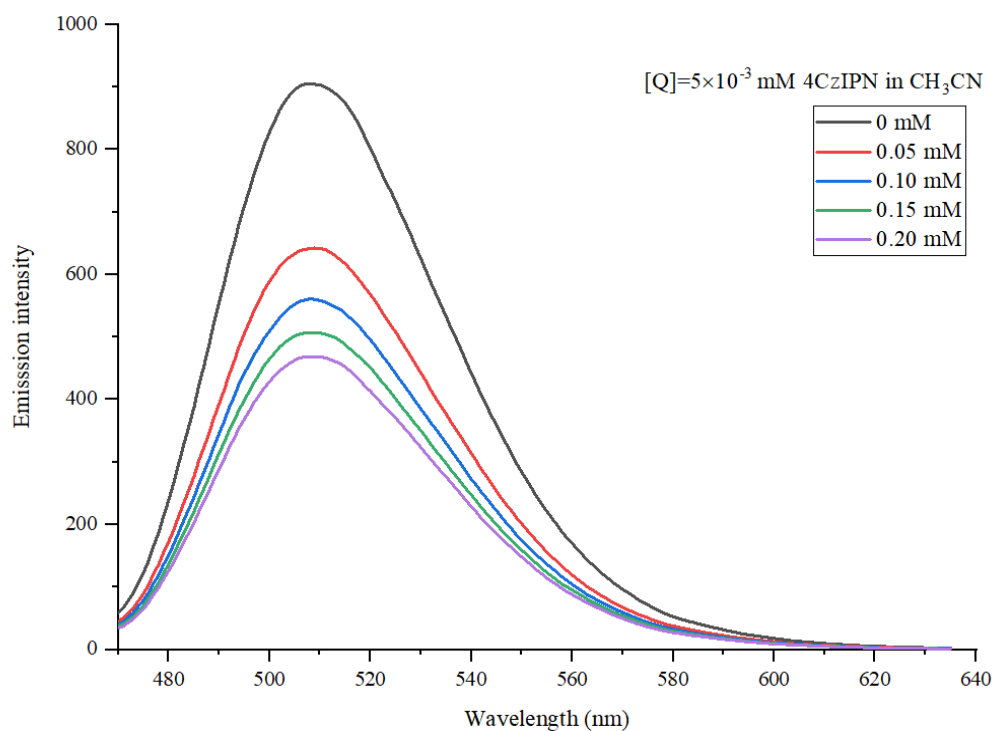

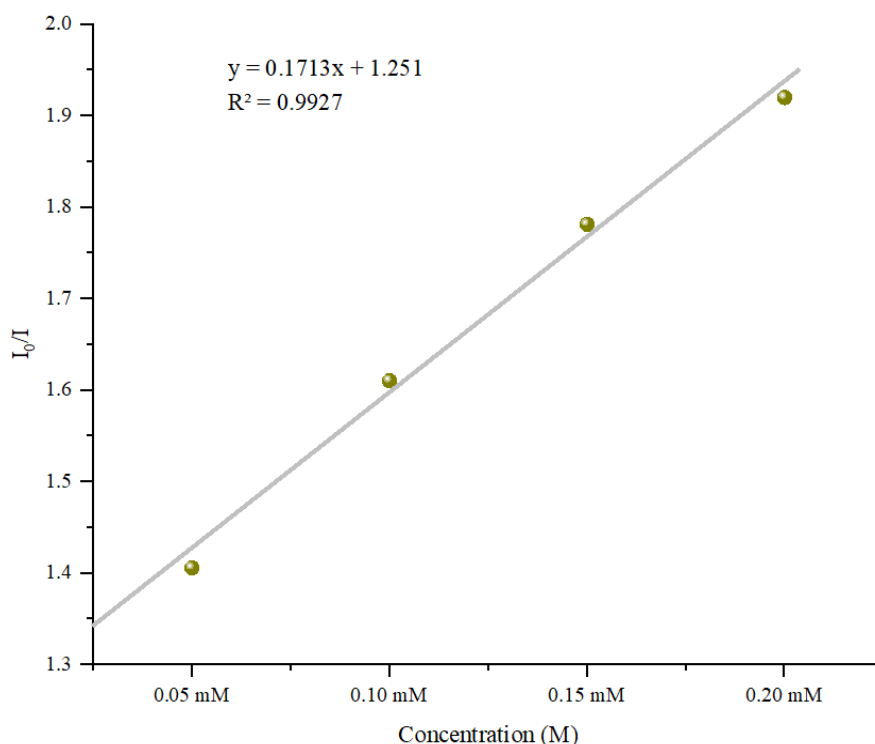

Figure 2. Emission quenching of 4CzIPN with (*i*-Pr)<sub>2</sub>NEt in CH<sub>3</sub>CN

## 6. Characterization data of products

### N<sup>2</sup>, N<sup>3</sup>-diphenylbutane-2,3-diamine (**3a**)

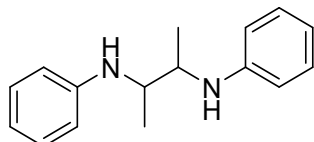

Purified by silica gel chromatography (petroleum ether/ethyl acetate = 20:1, v/v), the desired product **3a** was obtained as a colourless oil. (30 mg, 82% yield). *meso/dl* 1:1; <sup>1</sup>H NMR (400 MHz, Chloroform-*d*) δ 7.18 (dtd, *J* = 14.3, 7.2, 1.9 Hz, 4H), 6.76 – 6.59 (m, 6H), 3.78 – 3.71 (m, 1H), 3.60 (dt, *J* = 6.1, 4.3 Hz, 1H), 1.26 – 1.18 (m, 6H). <sup>13</sup>C NMR (100 MHz, Chloroform-*d*) δ 147.6, 147.6, 129.5, 129.4, 117.7, 117.6, 113.8, 113.6, 52.6, 52.3, 17.0, 16.3. HRMS (ESI) calcd for C<sub>16</sub>H<sub>20</sub>N<sub>2</sub>, [M+H]<sup>+</sup> *m/z* 241.1699; Found: 241.1692.

### N<sup>2</sup>, N<sup>3</sup>-di-*p*-tolylbutane-2,3-diamine (**3b**)

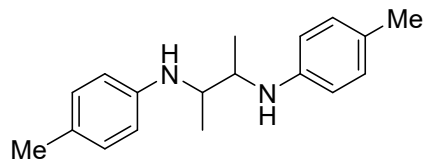

Purified by silica gel chromatography (petroleum ether/ethyl acetate = 30:1, v/v), the desired product **3b** was obtained as a colourless oil. (31 mg, 77% yield). *meso/dl* 1:1.5; <sup>1</sup>H NMR (400

MHz, Chloroform-*d*)  $\delta$  7.03 – 6.93 (m, 4H), 6.59 – 6.49 (m, 4H), 3.72 – 3.62 (m, 1H), 3.51 (ddd,  $J = 9.8, 7.1, 4.9$  Hz, 2H), 2.24 (d,  $J = 4.4$  Hz, 6H), 1.21 – 1.14 (m, 6H).  $^{13}\text{C}$  NMR (100 MHz, Chloroform-*d*)  $\delta$  145.3, 145.2, 129.9, 129.8, 126.9, 126.8, 114.1, 113.9, 52.9, 52.7, 29.7, 20.4, 16.9, 16.2. HRMS (ESI) calcd for  $\text{C}_{18}\text{H}_{24}\text{N}_2$ ,  $[\text{M}+\text{H}]^+$   $m/z$  269.2012; Found: 269.2011.

### **$\text{N}^2, \text{N}^3$ -bis(4-ethylphenyl)butane-2,3-diamine (3c)**

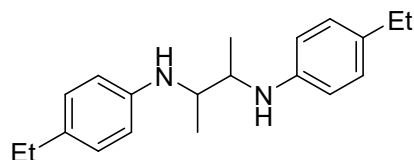

Purified by silica gel chromatography (petroleum ether/ethyl acetate = 30:1, v/v), the desired product **3c** was obtained as a yellow oil. (34 mg, 80% yield). *meso/dl* 1:1.5;  $^1\text{H}$  NMR (400 MHz, Chloroform-*d*)  $\delta$  7.05 – 6.96 (m, 4H), 6.61 – 6.52 (m, 4H), 3.72 – 3.63 (m, 1H), 3.52 (dt,  $J = 5.9, 4.2$  Hz, 1H), 2.54 (qd,  $J = 7.6, 4.2$  Hz, 4H), 1.23 – 1.13 (m, 12H).  $^{13}\text{C}$  NMR (100 MHz, Chloroform-*d*)  $\delta$  145.6, 145.5, 133.5, 133.4, 128.8, 128.7, 114.1, 113.8, 52.9, 52.7, 28.0, 17.1, 16.3, 16.0. HRMS (ESI) calcd for  $\text{C}_{20}\text{H}_{28}\text{N}_2$ ,  $[\text{M}+\text{H}]^+$   $m/z$  297.2325; Found: 297.2327.

### **$\text{N}^2, \text{N}^3$ -bis(4-isopropylphenyl)butane-2,3-diamine (3d)**

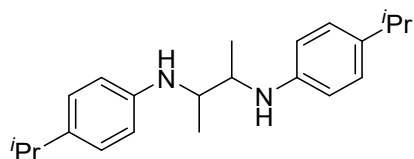

Purified by silica gel chromatography (petroleum ether/ethyl acetate = 30:1, v/v), the desired product **3d** was obtained as a colourless oil. (37 mg, 76% yield). *meso/dl* 1:2;  $^1\text{H}$  NMR (400 MHz, Chloroform-*d*)  $\delta$  7.09 – 6.96 (m, 4H), 6.62 – 6.51 (m, 4H), 3.70 – 3.61 (m, 1H), 3.50 (dt,  $J = 5.9, 4.2$  Hz, 2H), 2.85 – 2.73 (m, 2H), 1.21 – 1.12 (m, 18H).  $^{13}\text{C}$  NMR (100 MHz, Chloroform-*d*)  $\delta$  145.6, 145.5, 138.1, 138.0, 127.2, 127.2, 113.8, 113.6, 52.9, 52.7, 33.1, 33.1, 24.2, 17.1, 16.3. HRMS (ESI) calcd for  $\text{C}_{22}\text{H}_{32}\text{N}_2$ ,  $[\text{M}+\text{Na}]^+$   $m/z$  347.2458; Found: 347.2453.

### **$\text{N}^2, \text{N}^3$ -bis(4-(tert-butyl)phenyl)butane-2,3-diamine (3e)**

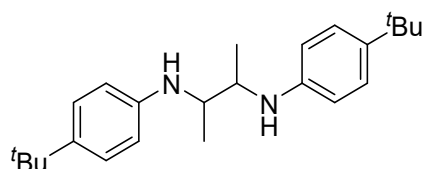

Purified by silica gel chromatography (petroleum ether/ethyl acetate = 30:1, v/v), the desired product **3e** was obtained as a colourless oil. (35 mg, 66% yield). *meso/dl* 1:1.7;  $^1\text{H}$  NMR (400 MHz, Chloroform-*d*)  $\delta$  7.25 – 7.16 (m, 4H), 6.65 – 6.53 (m, 4H), 3.73 – 3.66 (m, 1H), 3.53 (dt,  $J = 5.9, 4.2$  Hz, 2H), 1.29 (d,  $J = 3.5$  Hz, 18H), 1.24 – 1.15 (m, 6H).  $^{13}\text{C}$  NMR (100 MHz, Chloroform-*d*)  $\delta$  145.3, 145.2, 140.4, 140.3, 126.2, 126.1, 113.5, 113.3, 52.9, 52.6, 33.9, 33.9, 31.6, 17.2, 16.4. HRMS (ESI) calcd for  $\text{C}_{24}\text{H}_{36}\text{N}_2$ ,  $[\text{M}+\text{H}]^+$   $m/z$  353.2951; Found: 353.2950.

### N<sup>2</sup>, N<sup>3</sup>-bis(4-fluorophenyl)butane-2,3-diamine (**3f**)

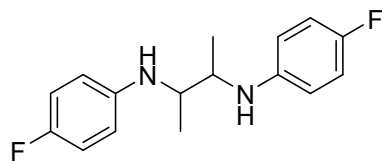

Purified by silica gel chromatography (petroleum ether/ethyl acetate = 15:1, v/v), the desired product **3f** was obtained as a yellow oil. (30 mg, 72% yield). *meso/dl* 1:1.5; <sup>1</sup>H NMR (400 MHz, Chloroform-*d*) δ 6.94 – 6.78 (m, 4H), 6.60 – 6.46 (m, 4H), 3.66 – 3.56 (m, 1H), 3.44 (dd, *J* = 4.6, 1.8 Hz, 2H), 1.23 – 1.11 (m, 6H). <sup>19</sup>F NMR (376 MHz, Chloroform-*d*) δ -119.14 – -135.60 (m). <sup>13</sup>C NMR (101 MHz, Chloroform-*d*) δ 155.9 (dd, *J* = 235.4, 6.3 Hz), 143.9 (dd, *J* = 4.2, 2.0 Hz), 121.1 – 102.1 (m), 53.6, 53.0, 17.0, 16.1. HRMS (ESI) calcd for C<sub>16</sub>H<sub>18</sub>F<sub>2</sub>N<sub>2</sub>, [M+H]<sup>+</sup> *m/z* 277.1511; Found: 277.1510.

### N<sup>2</sup>, N<sup>3</sup>-bis(4-chlorophenyl)butane-2,3-diamine (**3g**)

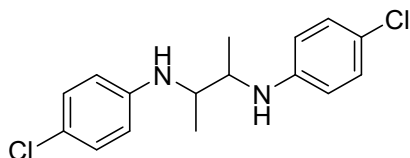

Purified by silica gel chromatography (petroleum ether/ethyl acetate = 15:1, v/v), the desired product **3g** was obtained as a yellow oil. (32 mg, 70% yield). *meso/dl* 1:1.2; <sup>1</sup>H NMR (400 MHz, Chloroform-*d*) δ 7.16 – 7.06 (m, 4H), 6.59 – 6.46 (m, 4H), 3.67 (q, *J* = 6.0 Hz, 1H), 3.61 (s, 2H), 3.51 (dt, *J* = 5.9, 4.2 Hz, 1H), 1.19 (dd, *J* = 11.0, 6.0 Hz, 6H). <sup>13</sup>C NMR (100 MHz, Chloroform-*d*) δ 146.1, 146.0, 129.3, 129.2, 129.1, 122.2, 122.1, 114.8, 114.6, 52.8, 52.3, 17.0, 16.2. HRMS (ESI) calcd for C<sub>16</sub>H<sub>18</sub>Cl<sub>2</sub>N<sub>2</sub>, [M+H]<sup>+</sup> *m/z* 309.0920; Found: 309.0924.

### N<sup>2</sup>, N<sup>3</sup>-bis(4-bromophenyl)butane-2,3-diamine (**3h**)

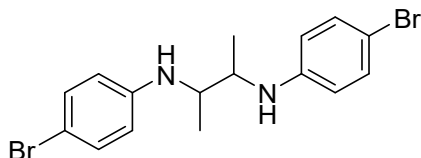

Purified by silica gel chromatography (petroleum ether/ethyl acetate = 15:1, v/v), the desired product **3h** was obtained as a yellow oil. (36 mg, 60% yield). *meso/dl* 1.4:1; <sup>1</sup>H NMR (400 MHz, Chloroform-*d*) δ 7.09 (dtd, *J* = 13.5, 8.1, 6.7 Hz, 2H), 6.45 – 6.24 (m, 6H), 3.69 (q, *J* = 5.9 Hz, 1H), 3.59 – 3.50 (m, 1H), 1.21 (dd, *J* = 11.0, 6.0 Hz, 6H). <sup>13</sup>C NMR (100 MHz, Chloroform-*d*) δ 146.5, 146.5, 132.1, 132.1, 115.3, 115.1, 109.2, 109.1, 52.7, 52.2, 16.9, 16.2. HRMS (ESI) calcd for C<sub>16</sub>H<sub>18</sub>Br<sub>2</sub>N<sub>2</sub>, [M+H]<sup>+</sup> *m/z* 398.9890; Found: 398.9886.



### N<sup>2</sup>, N<sup>3</sup>-bis(4-(trifluoromethoxy)phenyl)butane-2,3-diamine (**3i**)

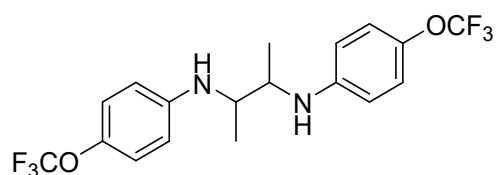

Purified by silica gel chromatography (petroleum ether/ethyl acetate = 7:1, v/v), the desired product **3i** was obtained as a colourless oil. (34 mg, 56% yield). *meso/dl* 2.5:1; <sup>1</sup>H NMR (400 MHz, Chloroform-*d*) δ 7.07 – 6.97 (m, 4H), 6.61 – 6.50 (m, 4H), 3.73 – 3.63 (m, 3H), 3.52 (dd, *J* = 4.5, 1.8 Hz, 1H), 1.21 (dd, *J* = 13.1, 5.9 Hz, 6H). <sup>19</sup>F NMR (376 MHz, Chloroform-*d*) δ -58.5. <sup>13</sup>C NMR (100 MHz, Chloroform-*d*) δ 146.3, 146.3, 122.6, 122.6, 114.0, 113.7, 53.0, 52.4, 17.1, 16.1. HRMS (ESI) calcd for C<sub>18</sub>H<sub>18</sub>F<sub>6</sub>N<sub>2</sub>O<sub>2</sub>, [M+H]<sup>+</sup> *m/z* 409.1345; Found: 409.1342.

### N<sup>2</sup>, N<sup>3</sup>-di-*m*-tolylbutane-2,3-diamine (**3j**)

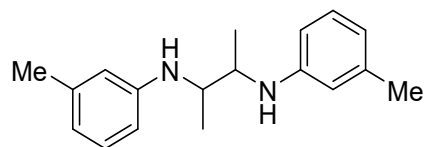

Purified by silica gel chromatography (petroleum ether/ethyl acetate = 30:1, v/v), the desired product **3j** was obtained as a colourless oil. (35 mg, 88% yield). *meso/dl* 1:1.4; <sup>1</sup>H NMR (400 MHz, Chloroform-*d*) δ 7.10 – 7.01 (m, 2H), 6.57 – 6.39 (m, 6H), 3.71 (dt, *J* = 7.1, 1.7 Hz, 1H), 3.58 (dt, *J* = 5.8, 4.3 Hz, 2H), 2.26 (d, *J* = 17.7 Hz, 6H), 1.22 – 1.15 (m, 6H). <sup>13</sup>C NMR (100 MHz, Chloroform-*d*) δ 147.7, 147.6, 139.2, 139.2, 129.3, 129.3, 118.6, 118.5, 114.6, 114.4, 111.0, 110.8, 52.4, 52.2, 21.7, 21.7, 16.9, 16.4. HRMS (ESI) calcd for C<sub>18</sub>H<sub>24</sub>N<sub>2</sub>, [M+H]<sup>+</sup> *m/z* 269.2012; Found: 269.2018.

### N<sup>2</sup>, N<sup>3</sup>-bis(3-methoxyphenyl)butane-2,3-diamine (**3k**)

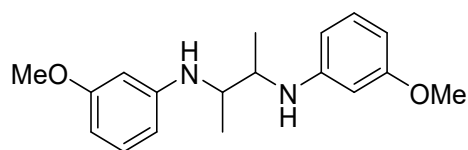

Purified by silica gel chromatography (petroleum ether/ethyl acetate = 10:1, v/v), the desired product **3k** was obtained as a yellow oil. (29 mg, 65% yield). *meso/dl* 1:1; <sup>1</sup>H NMR (400 MHz, Chloroform-*d*) δ 7.09 (dt, *J* = 14.0, 8.1 Hz, 2H), 6.36 – 6.13 (m, 6H), 3.79 (s, 3H), 3.73 (s, 3H), 3.68 (s, 1H), 3.63 – 3.56 (m, 1H), 1.22 (dd, *J* = 11.3, 5.9 Hz, 6H). <sup>13</sup>C NMR (100 MHz, Chloroform-*d*) δ 160.9, 160.9, 149.0, 148.9, 130.1, 130.1, 106.7, 106.6, 103.0, 102.9, 99.4, 55.1, 55.0, 52.5, 52.2, 29.7, 17.0, 16.3. HRMS (ESI) calcd for C<sub>18</sub>H<sub>24</sub>O<sub>2</sub>N<sub>2</sub>, [M+H]<sup>+</sup> *m/z* 301.1910; Found: 301.1909.

### **N<sup>2</sup>, N<sup>3</sup>-bis(3-ethylphenyl)butane-2,3-diamine (3l)**

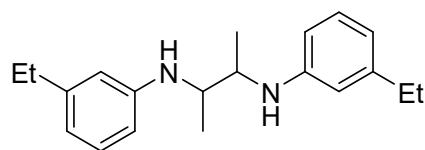

Purified by silica gel chromatography (petroleum ether/ethyl acetate = 30:1, v/v), the desired product **3l** was obtained as a yellow oil. (36 mg, 85% yield). *meso/dl* 1:2.5; <sup>1</sup>H NMR (400 MHz, Chloroform-*d*) δ 7.15 – 7.03 (m, 2H), 6.61 – 6.39 (m, 6H), 3.72 (d, *J* = 6.0 Hz, 1H), 3.62 – 3.56 (m, 1H), 2.55 (dq, *J* = 17.9, 7.6 Hz, 4H), 1.20 (dt, *J* = 15.4, 7.4 Hz, 12H). <sup>13</sup>C NMR (100 MHz, Chloroform-*d*) δ 147.8, 147.7, 145.7, 145.6, 129.4, 129.3, 117.4, 117.3, 113.6, 113.3, 111.1, 110.9, 52.4, 52.3, 29.2, 29.1, 16.9, 16.4, 15.7, 15.6. HRMS (ESI) calcd for C<sub>20</sub>H<sub>28</sub>N<sub>2</sub>, [M+H]<sup>+</sup> *m/z* 297.2325; Found: 297.2324.

### **N<sup>2</sup>, N<sup>3</sup>-bis(3-isopropylphenyl)butane-2,3-diamine (3m)**

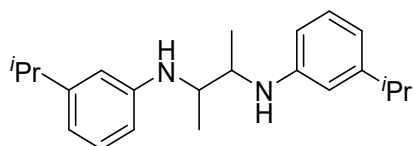

Purified by silica gel chromatography (petroleum ether/ethyl acetate = 30:1, v/v), the desired product **3m** was obtained as a colourless oil. (43 mg, 88% yield). *meso/dl* 1:1.4; <sup>1</sup>H NMR (400 MHz, Chloroform-*d*) δ 7.18 – 7.03 (m, 2H), 6.65 – 6.36 (m, 6H), 3.77 – 3.52 (m, 3H), 2.85 – 2.71 (m, 2H), 1.22 (ddd, *J* = 15.0, 7.0, 2.0 Hz, 18H). <sup>13</sup>C NMR (100 MHz, Chloroform-*d*) δ 150.3, 150.2, 147.6, 147.5, 129.3, 129.2, 115.9, 115.8, 112.2, 112.0, 111.0, 110.8, 52.3, 52.3, 34.3, 34.2, 24.0, 24.0, 16.8, 16.3. HRMS (ESI) calcd for C<sub>18</sub>H<sub>24</sub>N<sub>2</sub>, [M+H]<sup>+</sup> *m/z* 325.2638; Found: 325.2636.

### **N<sup>2</sup>, N<sup>3</sup>-bis(3-(tert-butyl)phenyl)butane-2,3-diamine (3n)**

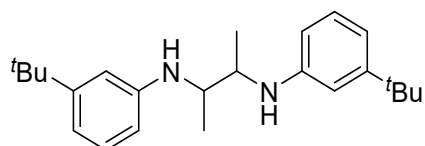

Purified by silica gel chromatography (petroleum ether/ethyl acetate = 30:1, v/v), the desired product **3n** was obtained as a colourless oil. (41 mg, 78% yield). *meso/dl* 1:1.7; <sup>1</sup>H NMR (400 MHz, Chloroform-*d*) δ 7.16 – 7.06 (m, 2H), 6.83 – 6.61 (m, 4H), 6.47 (dddd, *J* = 20.7, 8.0, 2.4, 1.2 Hz, 2H), 3.76 – 3.69 (m, 1H), 3.68 – 3.54 (m, 2H), 1.31 – 1.17 (m, 24H). <sup>13</sup>C NMR (100 MHz, Chloroform-*d*) δ 152.5, 152.5, 147.4, 147.3, 129.1, 129.0, 115.0, 114.9, 111.5, 111.4, 110.5, 110.2, 52.6, 52.4, 34.7, 34.6, 31.4, 31.4, 17.0, 16.3. HRMS (ESI) calcd for C<sub>24</sub>H<sub>36</sub>N<sub>2</sub>, [M+H]<sup>+</sup> *m/z* 353.2951; Found: 353.2950.

### **N<sup>2</sup>, N<sup>3</sup>-bis(3-fluorophenyl)butane-2,3-diamine (3o)**

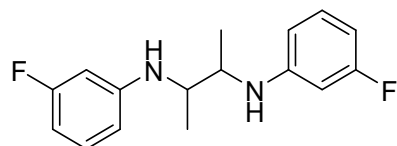

Purified by silica gel chromatography (petroleum ether/ethyl acetate = 15:1, v/v), the desired product **3o** was obtained as a yellow oil. (32 mg, 76% yield). *meso/dl* 2:1;  $^1\text{H}$  NMR (400 MHz, Chloroform-*d*)  $\delta$  7.09 (dtd,  $J = 13.4, 8.2, 6.7$  Hz, 2H), 6.43 – 6.24 (m, 6H), 3.71 – 3.65 (m, 1H), 3.56 – 3.50 (m, 1H), 1.24 – 1.17 (m, 6H).  $^{19}\text{F}$  NMR (376 MHz, Chloroform-*d*)  $\delta$  -112.62 (d,  $J = 43.2$  Hz).  $^{13}\text{C}$  NMR (101 MHz, Chloroform-*d*)  $\delta$  164.1 (dd,  $J = 243.0, 2.4$  Hz), 149.2 (d,  $J = 10.8$  Hz), 130.5 (dd,  $J = 10.3, 4.0$  Hz), 116.1 – 95.7 (m), 52.6, 52.1, 17.1, 16.2. HRMS (ESI) calcd for  $\text{C}_{16}\text{H}_{18}\text{F}_2\text{N}_2$ ,  $[\text{M}+\text{H}]^+$   $m/z$  277.1511; Found: 277.1508.

### **$\text{N}^2, \text{N}^3$ -bis(3-chlorophenyl)butane-2,3-diamine (3p)**

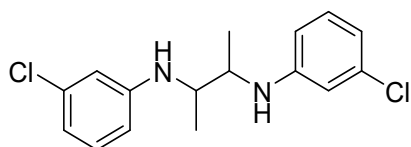

Purified by silica gel chromatography (petroleum ether/ethyl acetate = 15:1, v/v), the desired product **3p** was obtained as a yellow oil. (38 mg, 81% yield). *meso/dl* 1:1.2;  $^1\text{H}$  NMR (400 MHz, Chloroform-*d*)  $\delta$  7.07 (dt,  $J = 13.8, 8.0$  Hz, 2H), 6.68 (td,  $J = 7.7, 1.9$  Hz, 2H), 6.59 (dt,  $J = 22.2, 2.2$  Hz, 2H), 6.47 (ddd,  $J = 23.0, 8.2, 2.4$  Hz, 2H), 3.73 – 3.67 (m, 2H), 3.54 (dd,  $J = 4.7, 1.7$  Hz, 1H), 1.20 (dd,  $J = 10.0, 6.1$  Hz, 6H).  $^{13}\text{C}$  NMR (100 MHz, Chloroform-*d*)  $\delta$  148.5, 135.2, 135.1, 130.4, 130.3, 117.5, 117.5, 113.2, 113.1, 112.0, 111.8, 52.5, 52.0, 17.0, 16.2. HRMS (ESI) calcd for  $\text{C}_{16}\text{H}_{18}\text{Cl}_2\text{N}_2$ ,  $[\text{M}+\text{H}]^+$   $m/z$  309.0920; Found: 309.0920.

### **$\text{N}^2, \text{N}^3$ -bis(3-bromophenyl)butane-2,3-diamine (3q)**

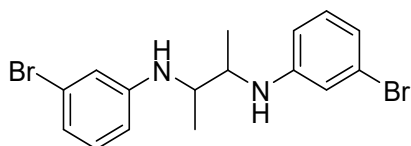

Purified by silica gel chromatography (petroleum ether/ethyl acetate = 15:1, v/v), the desired product **3q** was obtained as a yellow oil. (50 mg, 84% yield). *meso/dl* 1.4:1;  $^1\text{H}$  NMR (400 MHz, Chloroform-*d*)  $\delta$  7.01 (dt,  $J = 14.3, 8.0$  Hz, 2H), 6.85 – 6.76 (m, 3H), 6.72 (t,  $J = 2.1$  Hz, 2H), 6.56 – 6.46 (m, 2H), 3.72 – 3.65 (m, 2H), 3.53 (dt,  $J = 5.9, 4.3$  Hz, 1H), 1.21 – 1.16 (m, 6H).  $^{13}\text{C}$  NMR (100 MHz, Chloroform-*d*)  $\delta$  148.7, 130.7, 130.7, 123.4, 123.4, 120.5, 120.4, 116.1, 116.0, 112.3, 112.2, 52.4, 52.0, 17.0, 16.2. HRMS (ESI) calcd for  $\text{C}_{16}\text{H}_{18}\text{Br}_2\text{N}_2$ ,  $[\text{M}+\text{H}]^+$   $m/z$  398.9890; Found: 398.9886.

### **$\text{N}^2, \text{N}^3$ -bis(3-(trifluoromethyl)phenyl)butane-2,3-diamine (3r)**

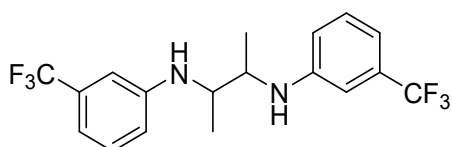

Purified by silica gel chromatography (petroleum ether/ethyl acetate = 8:1, v/v), the desired product **3r** was obtained as a colourless oil. (34 mg, 60% yield). *meso/dl* 1:1;  $^1\text{H}$  NMR (400 MHz, Chloroform-*d*)  $\delta$  7.31 – 7.24 (m, 2H), 6.96 (t,  $J = 8.0$  Hz, 2H), 6.88 – 6.70 (m, 4H), 3.84 (s, 1H), 3.80 (d,

$J = 6.3$  Hz, 1H), 3.65 (dt,  $J = 6.1, 4.4$  Hz, 1H), 1.26 (dd,  $J = 8.4, 6.0$  Hz, 6H).  $^{19}\text{F}$  NMR (376 MHz, Chloroform-*d*)  $\delta$  -62.88 (d,  $J = 5.5$  Hz).  $^{13}\text{C}$  NMR (101 MHz, Chloroform-*d*)  $\delta$  147.5, 129.9 (d,  $J = 4.3$  Hz), 116.4 (d,  $J = 13.6$  Hz), 114.1, 109.7 (d,  $J = 10.2$  Hz), 52.4, 52.0, 17.0, 16.2. HRMS (ESI) calcd for  $\text{C}_{18}\text{H}_{18}\text{F}_6\text{N}_2$ ,  $[\text{M}+\text{H}]^+$   $m/z$  377.1447; Found: 377.1444.

### **$\text{N}^2, \text{N}^3$ -di-*o*-tolylbutane-2,3-diamine (3s)**

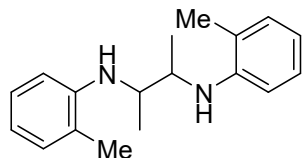

Purified by silica gel chromatography (petroleum ether/ethyl acetate = 50:1, v/v), the desired product **3s** was obtained as a colourless oil. (21 mg, 51% yield). *meso/dl* 1:3.5;  $^1\text{H}$  NMR (400 MHz, Chloroform-*d*)  $\delta$  7.18 – 6.99 (m, 4H), 6.76 – 6.59 (m, 4H), 3.84 (tdd,  $J = 8.3, 6.6, 2.9$  Hz, 1H), 3.68 (dt,  $J = 6.0, 4.3$  Hz, 1H), 3.57 (s, 1H), 2.07 (d,  $J = 14.4$  Hz, 6H), 1.29 – 1.23 (m, 6H).  $^{13}\text{C}$  NMR (100 MHz, Chloroform-*d*)  $\delta$  145.4, 130.4, 130.4, 127.2, 127.2, 122.5, 117.1, 110.9, 110.6, 52.6, 17.6, 17.6, 17.3, 16.6. HRMS (ESI) calcd for  $\text{C}_{18}\text{H}_{24}\text{N}_2$ ,  $[\text{M}+\text{H}]^+$   $m/z$  269.2012; Found: 269.2018.

### **$\text{N}^2, \text{N}^3$ -bis(2-ethylphenyl)butane-2,3-diamine (3t)**

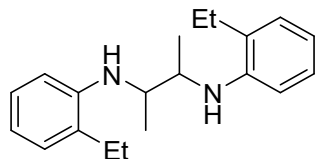

Purified by silica gel chromatography (petroleum ether/ethyl acetate = 30:1, v/v), the desired product **3t** was obtained as a yellow oil. (25 mg, 60% yield). *meso/dl* 1:3;  $^1\text{H}$  NMR (400 MHz, Chloroform-*d*)  $\delta$  7.04 (dt,  $J = 29.1, 7.8$  Hz, 4H), 6.63 (dt,  $J = 22.3, 7.9$  Hz, 4H), 3.77 (d,  $J = 6.1$  Hz, 1H), 3.61 (q,  $J = 5.1$  Hz, 3H), 2.34 (dq,  $J = 14.7, 7.5$  Hz, 4H), 1.22 – 1.10 (m, 12H).  $^{13}\text{C}$  NMR (100 MHz, Chloroform-*d*)  $\delta$  143.8, 143.8, 127.2, 127.0, 126.0, 126.0, 116.2, 116.1, 110.1, 109.8, 51.5, 51.0, 22.9, 22.9, 22.7, 16.4, 15.4, 11.9. HRMS (ESI) calcd for  $\text{C}_{20}\text{H}_{28}\text{N}_2$ ,  $[\text{M}+\text{H}]^+$   $m/z$  297.2325; Found: 297.2325.

### **$\text{N}^2, \text{N}^3$ -bis(2-isopropylphenyl)butane-2,3-diamine (3u)**

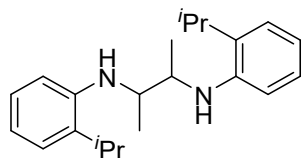

Purified by silica gel chromatography (petroleum ether/ethyl acetate = 30:1, v/v), the desired product **3u** was obtained as a colourless oil. (25 mg, 52% yield). *meso/dl* 1:1.4;  $^1\text{H}$  NMR (400 MHz, Chloroform-*d*)  $\delta$  7.03 (td,  $J = 7.4, 1.7$  Hz, 4H), 6.67 – 6.55 (m, 4H), 3.73 (q,  $J = 5.8$  Hz, 1H), 3.68 (s, 1H), 3.60 – 3.52 (m, 1H), 2.68 (dq,  $J = 14.2, 6.9$  Hz, 2H), 1.18 – 1.06 (m, 19H).  $^{13}\text{C}$  NMR (100 MHz, Chloroform-*d*)  $\delta$  143.1, 143.1, 131.7, 131.7, 125.7, 125.7, 124.2, 124.2, 116.4, 116.3, 110.7, 110.3, 51.8, 51.3, 26.2, 26.2, 21.4, 21.4, 21.3, 21.1, 16.5, 15.3. HRMS (ESI) calcd for  $\text{C}_{18}\text{H}_{24}\text{N}_2$ ,  $[\text{M}+\text{Na}]^+$   $m/z$  347.2458; Found: 347.2453

### N<sup>2</sup>,N<sup>3</sup>-bis(3,4-dimethylphenyl)butane-2,3-diamine (3v)

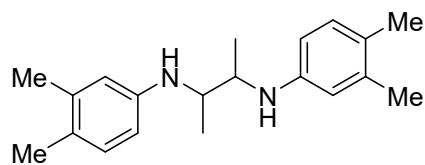

Purified by silica gel chromatography (petroleum ether/ethyl acetate = 20:1, v/v), the desired product **3v** was obtained as a colourless oil. (25 mg, 57% yield). *meso/dl* 1:1.5; <sup>1</sup>H NMR (400 MHz, Chloroform-*d*) δ 6.93 (dd, *J* = 12.7, 8.0 Hz, 2H), 6.51 – 6.34 (m, 4H), 3.66 (td, *J* = 6.2, 4.4 Hz, 1H), 3.53 (dt, *J* = 5.9, 4.3 Hz, 1H), 2.22 – 2.12 (m, 12H), 1.17 (dd, *J* = 11.5, 6.0 Hz, 6H). <sup>13</sup>C NMR (100 MHz, Chloroform-*d*) δ 148.7, 130.7, 130.7, 123.5, 123.4, 120.5, 120.4, 116.1, 116.0, 112.4, 112.2, 52.4, 52.2, 52.0, 17.0, 16.2. HRMS (ESI) calcd for C<sub>20</sub>H<sub>28</sub>N<sub>2</sub>, [M+H]<sup>+</sup> *m/z* 297.2325; Found: 297.2328.

### N<sup>2</sup>,N<sup>3</sup>-bis(3,5-dimethylphenyl)butane-2,3-diamine (3w)

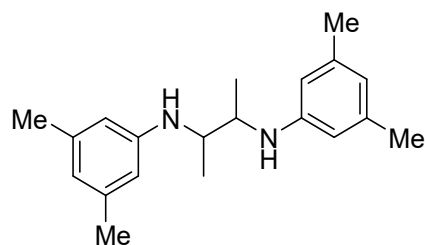

Purified by silica gel chromatography (petroleum ether/ethyl acetate = 20:1, v/v), the desired product **3w** was obtained as a colourless oil. (30 mg, 67% yield). *meso/dl* 1:1.5; <sup>1</sup>H NMR (400 MHz, Chloroform-*d*) δ 6.36 (d, *J* = 10.3 Hz, 2H), 6.25 (d, *J* = 26.5 Hz, 4H), 3.68 (d, *J* = 5.9 Hz, 1H), 3.57 (dt, *J* = 5.9, 3.0 Hz, 2H), 2.21 (d, *J* = 15.9 Hz, 12H), 1.16 (t, *J* = 6.6 Hz, 6H). <sup>13</sup>C NMR (100 MHz, Chloroform-*d*) δ 147.7, 147.5, 139.1, 139.0, 119.6, 119.4, 111.7, 111.4, 52.1, 52.0, 21.5, 21.5, 16.5, 16.4. HRMS (ESI) calcd for C<sub>20</sub>H<sub>28</sub>N<sub>2</sub>, [M+H]<sup>+</sup> *m/z* 297.2325; Found: 297.2323.

### N<sup>2</sup>,N<sup>3</sup>-bis(3-chloro-5-fluorophenyl)butane-2,3-diamine (3x)

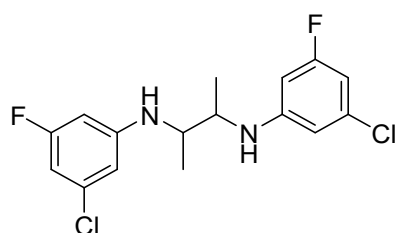

Purified by silica gel chromatography (petroleum ether/ethyl acetate = 8:1, v/v), the desired product **3x** was obtained as a colourless oil. (26 mg, 51% yield). *meso/dl* 1.4:1; <sup>1</sup>H NMR (400 MHz, Chloroform-*d*) δ 6.96 (dt, *J* = 12.2, 8.8 Hz, 2H), 6.62 (ddd, *J* = 22.2, 6.1, 2.9 Hz, 2H), 6.44 (ddt, *J* = 21.5, 8.9, 3.3 Hz, 2H), 3.62 (q, *J* = 5.8 Hz, 2H), 3.49 (s, 1H), 3.44 (dt, *J* = 5.9, 4.2 Hz, 1H), 1.20 (dd, *J* = 13.1, 6.0 Hz, 6H). <sup>19</sup>F NMR (376 MHz, Chloroform-*d*) δ -130.60 (d, *J* = 31.8 Hz). <sup>13</sup>C NMR (101 MHz, Chloroform-*d*) δ 151.1 (dd, *J* = 238.2, 7.5 Hz), 144.3 (d, *J* = 2.2 Hz), 121.2 (dd, *J* = 18.4, 4.5 Hz), 117.2 – 110.3 (m), 53.3, 52.7, 31.5, 31.5, 30.2, 30.6, 17.0, 16.1. HRMS (ESI) calcd for C<sub>16</sub>H<sub>16</sub>Cl<sub>2</sub>F<sub>2</sub>N<sub>2</sub>, [M+H]<sup>+</sup> *m/z* 345.0731; Found: 345.0729.

### **N<sup>2</sup>,N<sup>3</sup>-bis(phenyl-d<sub>5</sub>)butane-2,3-diamine (3y)**

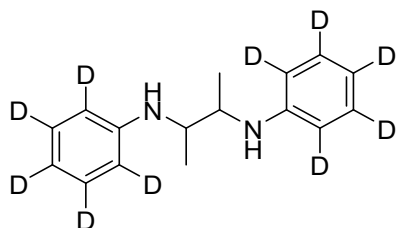

Purified by silica gel chromatography (petroleum ether/ethyl acetate = 20:1, v/v), the desired product **3y** was obtained as a colourless oil. (30 mg, 83% yield). *meso/dl* 1:2.5; <sup>1</sup>H NMR (400 MHz, Chloroform-*d*) δ 3.76 – 3.69 (m, 1H), 3.62 – 3.54 (m, 2H), 1.28 – 1.16 (m, 6H). <sup>13</sup>C NMR (100 MHz, Chloroform-*d*) δ 52.6, 52.2, 17.0, 16.3. HRMS (ESI) calcd for C<sub>16</sub>H<sub>10</sub>D<sub>10</sub>N<sub>2</sub>, [M+H]<sup>+</sup> *m/z* 251.2325; Found: 251.2327.

### **N<sup>2</sup>,N<sup>3</sup>-bis(2,3-dihydro-1H-inden-5-yl)butane-2,3-diamine (3z)**

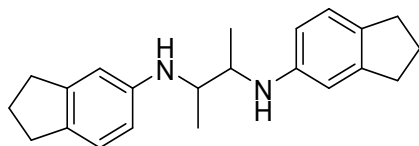

Purified by silica gel chromatography (petroleum ether/ethyl acetate = 20:1, v/v), the desired product **3z** was obtained as a colourless oil. (34 mg, 70% yield). *meso/dl* 1:1; <sup>1</sup>H NMR (400 MHz, Chloroform-*d*) δ 7.02 (dd, *J* = 12.0, 8.0 Hz, 2H), 6.56 (dd, *J* = 20.8, 2.3 Hz, 2H), 6.44 (ddd, *J* = 12.7, 8.0, 2.3 Hz, 2H), 3.68 (dt, *J* = 7.1, 1.8 Hz, 1H), 3.54 (dd, *J* = 4.6, 1.7 Hz, 1H), 2.87 – 2.76 (m, 8H), 2.04 (pd, *J* = 7.4, 4.9 Hz, 4H), 1.22 – 1.15 (m, 6H). <sup>13</sup>C NMR (100 MHz, Chloroform-*d*) δ 146.4, 146.3, 145.6, 145.6, 133.4, 133.3, 125.0, 124.9, 112.4, 112.2, 110.2, 109.9, 53.0, 52.9, 33.2, 33.2, 32.0, 25.8, 17.0, 16.3. HRMS (ESI) calcd for C<sub>22</sub>H<sub>28</sub>N<sub>2</sub>, [M+H]<sup>+</sup> *m/z* 321.2325; Found: 321.2328.

### **N<sup>3</sup>,N<sup>4</sup>-diphenylhexane-3,4-diamine (6)**

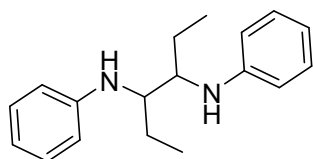

Purified by silica gel chromatography (petroleum ether/ethyl acetate = 50:1, v/v), the desired product **6** was obtained as a colourless oil. (9 mg, 22% yield). <sup>1</sup>H NMR (400 MHz, Chloroform-*d*) δ 7.14 (dtd, *J* = 18.7, 7.3, 1.9 Hz, 4H), 6.72 – 6.60 (m, 4H), 6.57 – 6.51 (m, 2H), 3.47 (d, *J* = 26.0 Hz, 4H), 1.77 – 1.60 (m, 2H), 1.47 (dt, *J* = 14.7, 7.3 Hz, 2H), 0.97 (dt, *J* = 15.2, 7.4 Hz, 6H). <sup>13</sup>C NMR (100 MHz, Chloroform-*d*) δ 148.6, 129.4, 129.3, 117.1, 117.1, 113.4, 113.1, 58.0, 57.7, 25.6, 24.6, 11.4, 11.1. HRMS (ESI) calcd for C<sub>18</sub>H<sub>24</sub>N<sub>2</sub>, [M+H]<sup>+</sup> *m/z* 269.2012; Found: 269.2015.

### **N<sup>2</sup>,N<sup>3</sup>-diphenylpentane-2,3-diamine (7)**

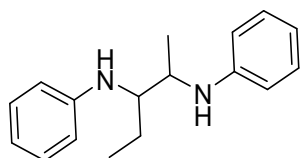

Purified by silica gel chromatography (petroleum ether/ethyl acetate = 20:1, v/v), the desired product **7** was obtained as a colourless oil. (15 mg, 38% yield).  $^1\text{H NMR}$  (400 MHz, Chloroform-*d*)  $\delta$  7.23 – 7.14 (m, 4H), 6.73 – 6.59 (m, 6H), 3.66 (qd,  $J = 6.4, 4.1$  Hz, 1H), 3.39 (dt,  $J = 8.4, 4.3$  Hz, 1H), 1.76 (ddp,  $J = 14.9, 7.5, 4.3, 3.8$  Hz, 1H), 1.47 (dt,  $J = 15.1, 7.6$  Hz, 1H), 1.21 (d,  $J = 6.4$  Hz, 3H), 0.96 (t,  $J = 7.4$  Hz, 3H).  $^{13}\text{C NMR}$  (100 MHz, Chloroform-*d*)  $\delta$  148.9, 148.5, 147.8, 147.5, 129.5, 129.4, 117.5, 117.5, 117.4, 117.3, 113.7, 113.6, 113.3, 59.0, 58.8, 51.2, 50.9, 25.9, 24.6, 17.8, 15.2, 11.5, 10.8. HRMS (ESI) calcd for  $\text{C}_{17}\text{H}_{22}\text{N}_2$ ,  $[\text{M}+\text{H}]^+$   $m/z$  255.1856; Found: 255.1862.

### **$\text{N}^4, \text{N}^5$ -diphenyloctane-4,5-diamine (8)**

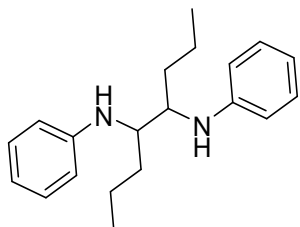

Purified by silica gel chromatography (petroleum ether/ethyl acetate = 50:1, v/v), the desired product **8** was obtained as a colourless oil. (19 mg, 42% yield).  $^1\text{H NMR}$  (400 MHz, Chloroform-*d*)  $\delta$  7.14 (dtd,  $J = 21.5, 7.3, 1.9$  Hz, 4H), 6.71 – 6.59 (m, 4H), 6.55 – 6.46 (m, 2H), 3.58 (dd,  $J = 8.0, 3.2$  Hz, 1H), 3.50 (d,  $J = 8.3$  Hz, 3H), 1.59 – 1.29 (m, 8H), 0.90 (dt,  $J = 15.9, 7.0$  Hz, 6H).  $^{13}\text{C NMR}$  (100 MHz, Chloroform-*d*)  $\delta$  148.8, 148.5, 147.8, 147.5, 129.5, 129.4, 129.4, 129.2, 117.5, 117.4, 117.3, 117.0, 113.7, 113.6, 113.2, 57.1, 56.9, 51.6, 51.4, 51.2, 35.3, 34.2, 20.0, 19.6, 17.7, 15.2, 14.3, 14.2. HRMS (ESI) calcd for  $\text{C}_{20}\text{H}_{28}\text{N}_2$ ,  $[\text{M}+\text{H}]^+$   $m/z$  297.2325; Found: 297.2330.

### **$\text{N}^2, \text{N}^3$ -diphenylhexane-2,3-diamine (9)**

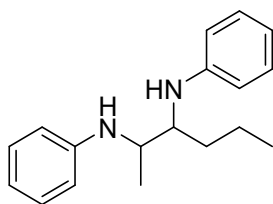

Purified by silica gel chromatography (petroleum ether/ethyl acetate = 20:1, v/v), the desired product **9** was obtained as a colourless oil. (10 mg, 25% yield).  $^1\text{H NMR}$  (400 MHz, Chloroform-*d*)  $\delta$  7.18 (ddd,  $J = 9.1, 7.2, 2.2$  Hz, 4H), 6.68 (dd,  $J = 22.0, 7.7$  Hz, 6H), 3.66 (qd,  $J = 6.4, 3.9$  Hz, 1H), 3.49 (dt,  $J = 8.2, 4.1$  Hz, 1H), 1.68 – 1.62 (m, 1H), 1.50 – 1.40 (m, 2H), 1.35 (td,  $J = 7.7, 4.2$  Hz, 1H), 1.20 (d,  $J = 6.4$  Hz, 3H), 0.89 (t,  $J = 7.1$  Hz, 3H).  $^{13}\text{C NMR}$  (101 MHz, Chloroform-*d*)  $\delta$  148.3, 129.4, 129.4, 117.7, 117.3, 113.8, 113.2, 57.0, 51.6, 34.1, 19.5, 17.5, 14.2. HRMS (ESI) calcd for  $\text{C}_{18}\text{H}_{24}\text{N}_2$ ,  $[\text{M}+\text{K}]^+$   $m/z$  307.1571; Found: 307.1575.

### 3,4-dimethyl-2,5-diphenyl-1,2,5-thiadiazolidine 1-oxide (10)

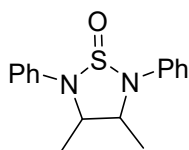

Purified by silica gel chromatography (petroleum ether/ethyl acetate = 5:1, v/v), the desired product **10** was obtained as a white solid (35 mg, 40% yield). mp 126 - 128°C, <sup>1</sup>H NMR (400 MHz, Chloroform-*d*) δ 7.45 – 7.32 (m, 4H), 7.28 – 7.19 (m, 5H), 7.14 – 7.06 (m, 1H), 4.44 – 4.33 (m, 1H), 3.99 – 3.86 (m, 1H), 1.48 (d, *J* = 6.1 Hz, 3H), 1.28 (d, *J* = 6.0 Hz, 3H). <sup>13</sup>C NMR (101 MHz, Chloroform-*d*) δ 141.1, 138.5, 129.6, 129.5, 126.4, 126.1, 123.4, 118.8, 63.6, 61.1, 17.6, 16.5. HRMS (ESI) calcd for C<sub>16</sub>H<sub>18</sub>N<sub>2</sub>OS, [M+H]<sup>+</sup> *m/z* 287.1213; Found: 287.1211.

### 2-chloro-4,5-dimethyl-1,3-diphenyl-1,3,2-diazaphospholidine 2-oxide (11)

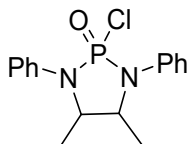

Purified by silica gel chromatography (petroleum ether/ethyl acetate = 7:1, v/v), the desired product **11** was obtained as a white solid. (20 mg, 21% yield). mp 130 - 132°C <sup>1</sup>H NMR (400 MHz, Chloroform-*d*) δ 7.47 – 7.32 (m, 8H), 7.25 – 7.13 (m, 2H), 4.00 (dq, *J* = 12.6, 6.3, 4.6 Hz, 1H), 3.93 – 3.82 (m, 1H), 1.40 (dd, *J* = 6.2, 2.8 Hz, 6H). <sup>31</sup>P NMR (162 MHz, Chloroform-*d*) δ 13.31. <sup>13</sup>C NMR (101 MHz, Chloroform-*d*) δ 138.0, 137.9, 137.3, 137.2, 129.6, 129.6, 125.2, 125.2, 124.4, 122.6, 122.5, 121.2, 121.1, 58.4, 58.2, 57.8, 57.6, 18.7, 18.7, 17.8, 17.8. HRMS (ESI) calcd for C<sub>16</sub>H<sub>18</sub>ClN<sub>2</sub>OP, [M+H]<sup>+</sup> *m/z* 321.0918; Found: 321.0915.

### 1,2-diphenylethane-1,2-diol (5a)

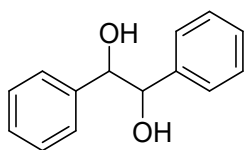

Purified by silica gel chromatography (petroleum ether/ethyl acetate = 7:1, v/v), the desired product **5a** was obtained as a white solid. (25 mg, 78% yield). *meso/dl* 1:1.7; <sup>1</sup>H NMR (400 MHz, Chloroform-*d*) δ 7.20 – 6.97 (m, 8H), 6.94 – 6.90 (m, 2H), 4.63 (s, 1H), 4.47 (s, 1H), 3.40 (s, 1H), 2.71 (s, 1H). <sup>13</sup>C NMR (101 MHz, Chloroform-*d*) δ 140.0, 140.0, 128.1, 128.1, 128.0, 127.9, 127.2, 127.1, 79.1.

### 1,2-di-p-tolylolethane-1,2-diol (5b)

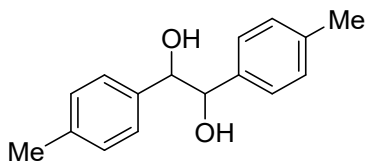



Purified by silica gel chromatography (petroleum ether/ethyl acetate = 7:1, v/v), the desired product **5b** was obtained as a white solid. (29 mg, 80% yield). *meso/dl* 1:1.1; <sup>1</sup>H NMR (400 MHz, Chloroform-*d*) δ 7.13 (q, *J* = 8.2 Hz, 4H), 7.05 – 6.97 (m, 4H), 4.71 (s, 1H), 4.62 (s, 1H), 2.90 (s, 1H), 2.31 (d, *J* = 17.3 Hz, 6H), 2.18 (s, 1H). <sup>13</sup>C NMR (101 MHz, Chloroform-*d*) δ 137.8, 137.5, 137.0, 137.0, 129, 128.8, 127.1, 126.9, 78.8, 78.0, 21.2, 21.2.

### 1,2-bis(4-methoxyphenyl)ethane-1,2-diol (**5c**)

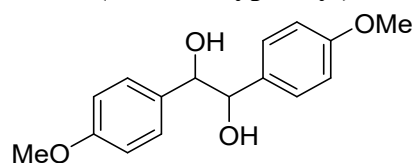

Purified by silica gel chromatography (petroleum ether/ethyl acetate = 3:1, v/v), the desired product **5c** was obtained as a white solid. (26 mg, 63% yield). *meso/dl* 1:1.7; <sup>1</sup>H NMR (400 MHz, Chloroform-*d*) δ 7.21 – 7.16 (m, 2H), 7.05 – 6.99 (m, 2H), 6.88 – 6.82 (m, 2H), 6.77 – 6.72 (m, 2H), 4.72 (s, 1H), 4.61 (s, 1H), 3.77 (d, *J* = 15.3 Hz, 6H), 2.89 (s, 1H), 2.18 (s, 1H). <sup>13</sup>C NMR (101 MHz, Chloroform-*d*) δ 159.4, 159.2, 132.1, 132.1, 128.3, 128.2, 113.7, 113.5, 78.8, 55.3, 55.2.

### 1,2-bis(3-methoxyphenyl)ethane-1,2-diol (**5d**)

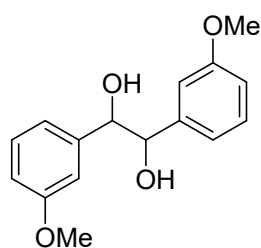

Purified by silica gel chromatography (petroleum ether/ethyl acetate = 3:1, v/v), the desired product **5d** was obtained as a white solid. (32 mg, 73% yield). *meso/dl* 1.1:10; <sup>1</sup>H NMR (400 MHz, Chloroform-*d*) δ 8.63 – 8.48 (m, 2H), 8.21 – 8.03 (m, 6H), 6.13 (s, 1H), 6.00 (s, 1H), 5.08 (d, *J* = 11.5 Hz, 6H), 4.43 (s, 1H), 3.79 (s, 1H). <sup>13</sup>C NMR (101 MHz, Chloroform-*d*) δ 159.5, 159.4, 141.5, 141.4, 129.3, 129.2, 119.5, 119.3, 114.0, 113.7, 112.3, 112.2, 78.9, 78.0, 55.2, 55.2.

### 1,2-bis(2-methoxyphenyl)ethane-1,2-diol (**5e**)

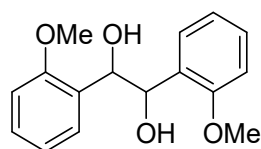

Purified by silica gel chromatography (petroleum ether/ethyl acetate = 5:1, v/v), the desired product **5e** was obtained as a white solid. (36 mg, 82% yield). *meso/dl* 1:1.1; <sup>1</sup>H NMR (400 MHz, Chloroform-*d*) δ 7.26 – 7.13 (m, 4H), 6.86 (dtd, *J* = 15.9, 7.5, 1.1 Hz, 2H), 6.79 (dd, *J* = 8.2, 1.1 Hz, 1H), 6.76 – 6.72 (m, 1H), 5.24 (d, *J* = 4.6 Hz, 1H), 5.03 (d, *J* = 3.5 Hz, 1H), 3.70 – 3.61 (m, 6H), 3.47 (d, *J* = 3.9 Hz, 1H), 3.13 (s, 1H). <sup>13</sup>C NMR (101 MHz, Chloroform-*d*) δ 156.97, 157.0, 128.6, 128.5, 128.5, 128.3, 120.5, 120.5, 110.3, 110.2, 74.5, 73.7, 73.7, 55.3, 55.2.

### 1,2-di([1,1'-biphenyl]-4-yl)ethane-1,2-diol (**5f**)

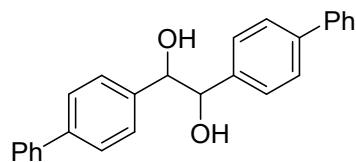

Purified by silica gel chromatography (petroleum ether/ethyl acetate = 5:1, v/v), the desired product **5f** was obtained as a white solid. (24 mg, 43% yield). *meso/dl* 1:1.2 <sup>1</sup>H NMR (400 MHz, Chloroform-*d*)  $\delta$  7.62 – 7.04 (m, 18H), 4.82 (s, 1H), 2.90 (s, 1H). <sup>13</sup>C NMR (101 MHz, Chloroform-*d*)  $\delta$  140.8, 140.6, 139.0, 128.8, 127.4, 127.4, 127.0, 126.9, 78.8. HRMS (ESI) calcd for C<sub>26</sub>H<sub>22</sub>O<sub>2</sub>, [M+Na]<sup>+</sup> *m/z* 389.1512; Found: 389.1516.

### 1,2-bis(4-(benzyloxy)phenyl)ethane-1,2-diol (**5g**)

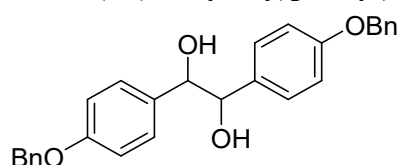

Purified by silica gel chromatography (petroleum ether/ethyl acetate = 3:1, v/v), the desired product **5g** was obtained as a white solid. (30 mg, 47% yield). *meso/dl* 1:1.5; <sup>1</sup>H NMR (400 MHz, Chloroform-*d*)  $\delta$  7.45 – 7.30 (m, 10H), 7.21 – 7.15 (m, 2H), 7.04 – 6.99 (m, 2H), 6.92 (d, *J* = 8.7 Hz, 2H), 6.85 – 6.79 (m, 2H), 5.02 (d, *J* = 16.7 Hz, 4H), 4.71 (s, 1H), 4.60 (s, 1H), 2.86 (s, 1H), 2.16 (s, 1H). <sup>13</sup>C NMR (101 MHz, Chloroform-*d*)  $\delta$  158.7, 158.4, 136.9, 132.4, 128.6, 128.6, 128.4, 128.2, 128.0, 128.0, 127.5, 114.7, 114.5, 70.0, 70.0.

### 1,2-bis(4-fluorophenyl)ethane-1,2-diol (**5h**)

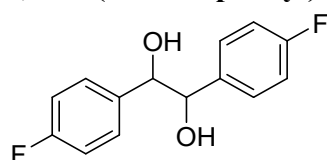

Purified by silica gel chromatography (petroleum ether/ethyl acetate = 5:1, v/v), the desired product **5h** was obtained as a white solid. (27 mg, 71% yield). *meso/dl* 1:1.5; <sup>1</sup>H NMR (400 MHz, Chloroform-*d*)  $\delta$  7.17 – 7.09 (m, 2H), 7.07 – 6.86 (m, 6H), 4.80 (s, 1H), 4.60 (s, 1H), 3.02 (s, 1H), 2.42 (s, 1H). <sup>19</sup>F NMR (376 MHz, Chloroform-*d*)  $\delta$  -114.05 (d, *J* = 30.5 Hz). <sup>13</sup>C NMR (101 MHz, Chloroform-*d*)  $\delta$  162.4 (d, *J* = 246.4 Hz), 135.4 (d, *J* = 3.2 Hz), 128.7 (dd, *J* = 8.1, 6.6 Hz), 115.1 (dd, *J* = 21.4, 2.4 Hz), 78.7.

### 1,2-bis(4-chlorophenyl)ethane-1,2-diol (**5i**)

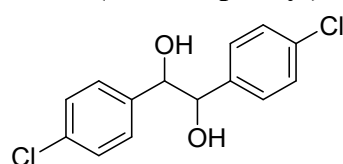

Purified by silica gel chromatography (petroleum ether/ethyl acetate = 3:1, v/v), the desired product **5i** was obtained as a white solid. (25 mg, 59% yield). *meso/dl* 1.2:1; <sup>1</sup>H NMR (400 MHz, Chloroform-*d*) δ 7.27 – 7.15 (m, 4H), 7.10 – 6.94 (m, 4H), 4.78 (s, 1H), 4.56 (s, 1H), 3.12 (s, 1H), 2.58 (s, 1H). <sup>13</sup>C NMR (101 MHz, Chloroform-*d*) δ 138.0, 137.8, 133.8, 133.8, 128.4, 128.3, 128.3.

### 1,2-bis(4-(trifluoromethyl)phenyl)ethane-1,2-diol (**5j**)

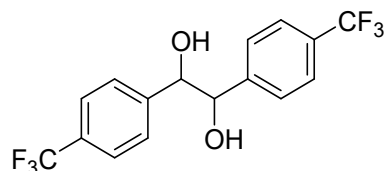

Purified by silica gel chromatography (petroleum ether/ethyl acetate = 3:1, v/v), the desired product **5j** was obtained as a white solid. (35 mg, 67% yield). *meso/dl* 1:1.2; <sup>1</sup>H NMR (400 MHz, Chloroform-*d*) δ 7.52 (t, *J* = 9.0 Hz, 4H), 7.24 (dd, *J* = 23.4, 8.0 Hz, 4H), 4.94 (s, 1H), 4.72 (s, 1H), 3.12 (s, 1H), 2.62 (s, 1H). <sup>19</sup>F NMR (376 MHz, Chloroform-*d*) δ -62.54 (d, *J* = 13.1 Hz). <sup>13</sup>C NMR (101 MHz, Chloroform-*d*) δ 143.3 (d, *J* = 16.1 Hz), 130.4 (dd, *J* = 32.5, 11.1 Hz), 134.2 – 120.8 (m), 122.6 (d, *J* = 6.1 Hz), 78.4.

### dimethyl 4,4'-(1,2-dihydroxyethane-1,2-diyl)dibenzoate (**5k**)

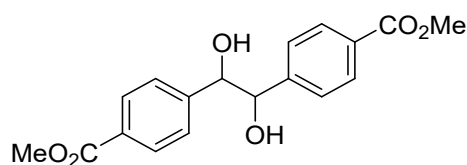

Purified by silica gel chromatography (petroleum ether/ethyl acetate = 3:1, v/v), the desired product **5k** was obtained as a white solid. (25 mg, 51% yield). *meso/dl* 1:1.3; <sup>1</sup>H NMR (400 MHz, Chloroform-*d*) δ 7.27 – 7.19 (m, 2H), 7.15 – 7.08 (m, 2H), 7.04 – 6.91 (m, 4H), 4.76 (s, 1H), 4.63 (s, 1H), 3.11 (s, 1H), 2.54 (s, 1H), 2.27 (d, *J* = 6.4 Hz, 6H). <sup>13</sup>C NMR (101 MHz, Chloroform-*d*) δ 169.6, 169.4, 150.3, 150.2, 137.4, 137.4, 128.2, 128.0, 121.3, 121.3, 21.1.

### di-tert-butyl ((1,2-dihydroxyethane-1,2-diyl)bis(4,1-phenylene))dicarbamate (**5l**)

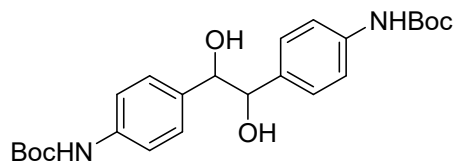

Purified by silica gel chromatography (petroleum ether/ethyl acetate = 2:1, v/v), the desired product **5l** was obtained as a white solid. (55 mg, 82% yield). mp 183 - 185°C *meso/dl* 1:1.3; <sup>1</sup>H NMR (400 MHz, Chloroform-*d*) δ 7.28 – 7.10 (m, 6H), 6.99 (d, *J* = 8.3 Hz, 2H), 6.54 (d, *J* = 16.8 Hz, 2H), 4.72 (s, 1H), 4.57 (s, 1H), 1.50 (d, *J* = 5.2 Hz, 18H). <sup>13</sup>C NMR (101 MHz, Chloroform-*d*) δ 152.8, 138.1, 137.9, 134.5, 134.4, 127.8, 127.7, 118.2, 118.1, 78.7, 77.6, 60.4, 28.4, 14.2. HRMS (ESI) calcd for C<sub>24</sub>H<sub>32</sub>N<sub>2</sub>O<sub>6</sub>, [M+H]<sup>+</sup> *m/z* 445.2333; Found: 445.2335.

### 1,2-di(thiophen-2-yl)ethane-1,2-diol (**5m**)

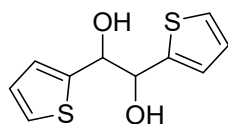

Purified by silica gel chromatography (petroleum ether/ethyl acetate = 7:1, v/v), the desired product **5m** was obtained as a white solid. (11 mg, 32% yield). *meso/dl* 1:1.4;  $^1\text{H NMR}$  (400 MHz, Chloroform-*d*)  $\delta$  7.31 (ddd,  $J = 11.7, 5.0, 1.2$  Hz, 1H), 7.26 – 7.23 (m, 1H), 7.04 – 6.96 (m, 2H), 6.91 (dd,  $J = 5.1, 3.5$  Hz, 1H), 6.83 (dd,  $J = 3.5, 1.2$  Hz, 1H), 5.12 (s, 1H), 5.05 (s, 1H), 3.04 (s, 1H), 2.53 (s, 1H).  $^{13}\text{C NMR}$  (101 MHz, Chloroform-*d*)  $\delta$  152.6, 142.5, 142.4, 110.4, 110.3, 108.2, 108.0, 70.1, 69.9.

### 1,2-di(furan-2-yl)ethane-1,2-diol (**5n**)

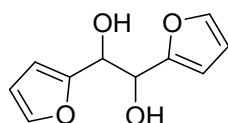

Purified by silica gel chromatography (petroleum ether/ethyl acetate = 7:1, v/v), the desired product **5n** was obtained as a white solid. (11 mg, 36% yield). *meso/dl* 1:1.3;  $^1\text{H NMR}$  (400 MHz, Chloroform-*d*)  $\delta$  7.38 (ddd,  $J = 12.9, 1.9, 0.9$  Hz, 2H), 6.37 – 6.21 (m, 4H), 5.03 (s, 1H), 5.01 (s, 1H), 2.85 (s, 1H), 2.51 (s, 1H).  $^{13}\text{C NMR}$  (101 MHz, Chloroform-*d*)  $\delta$  152.8, 152.6, 142.5, 142.4, 110.4, 110.3, 108.2, 108.0, 70.1, 70.0.

### 4-(2-(4-(((1S,2R,5R)-adamantane-2-carbonyloxy)phenyl)-1,2-dihydroxyethyl)phenyl)-1,2-dihydroxyethyl)phenyl (1r,3r,5r,7r)-adamantane-2-carboxylate (**5o**)

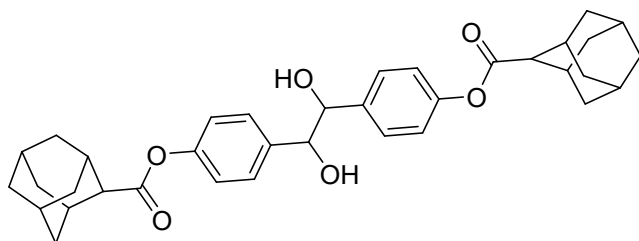

Purified by silica gel chromatography (petroleum ether/ethyl acetate = 3:1, v/v), the desired product **5o** was obtained as a white solid. (48 mg, 56% yield). mp 195 - 197°C *meso/dl* 1:1.7;  $^1\text{H NMR}$  (400 MHz, Chloroform-*d*)  $\delta$  6.02 – 5.89 (m, 2H), 5.82 (d,  $J = 8.0$  Hz, 2H), 5.67 (dd,  $J = 21.3, 8.1$  Hz, 4H), 3.49 (d,  $J = 2.7$  Hz, 1H), 3.33 (d,  $J = 3.2$  Hz, 1H), 1.94 (s, 1H), 1.38 (d,  $J = 16.4$  Hz, 1H), 0.79 (dt,  $J = 18.0, 3.2$  Hz, 17H), 0.50 (t,  $J = 3.4$  Hz, 11H).  $^{13}\text{C NMR}$  (101 MHz, Chloroform-*d*)  $\delta$  176.2, 137.1, 128.1, 128.0, 121.3, 41.0, 41.0, 38.8, 36.5, 27.9. HRMS (ESI) calcd for  $\text{C}_{36}\text{H}_{42}\text{O}_6$ ,  $[\text{M}+\text{H}]^+$   $m/z$  571.3054; Found: 571.3055.

## 7. Reference

- (1) (a) J. Luo and J. Zhang, *ACS Catal.*, 2020, **10**, 14302-14303; (b) E. Speckmeier, T. G. Fischer and K. Zeitler, *J. Am. Chem. Soc.*, 2018, **140**, 15353-15365.

- (2) J. L. Li, D. Zhang, J. H. Chen, C. Q. Ma, and W. H. Hu, *ACS Catal.*, 2020, **10**, 4559–4565.
- (3) D. V. Hrishikesh, R. A. Annadate and S. V. Pansare, *ACS Omega.*, 2023, **8**, 3190-3197.

## 8. NMR spectra

$^1\text{H}$ -NMR spectrum of **3a** ( $\text{CDCl}_3$ , 400 MHz)

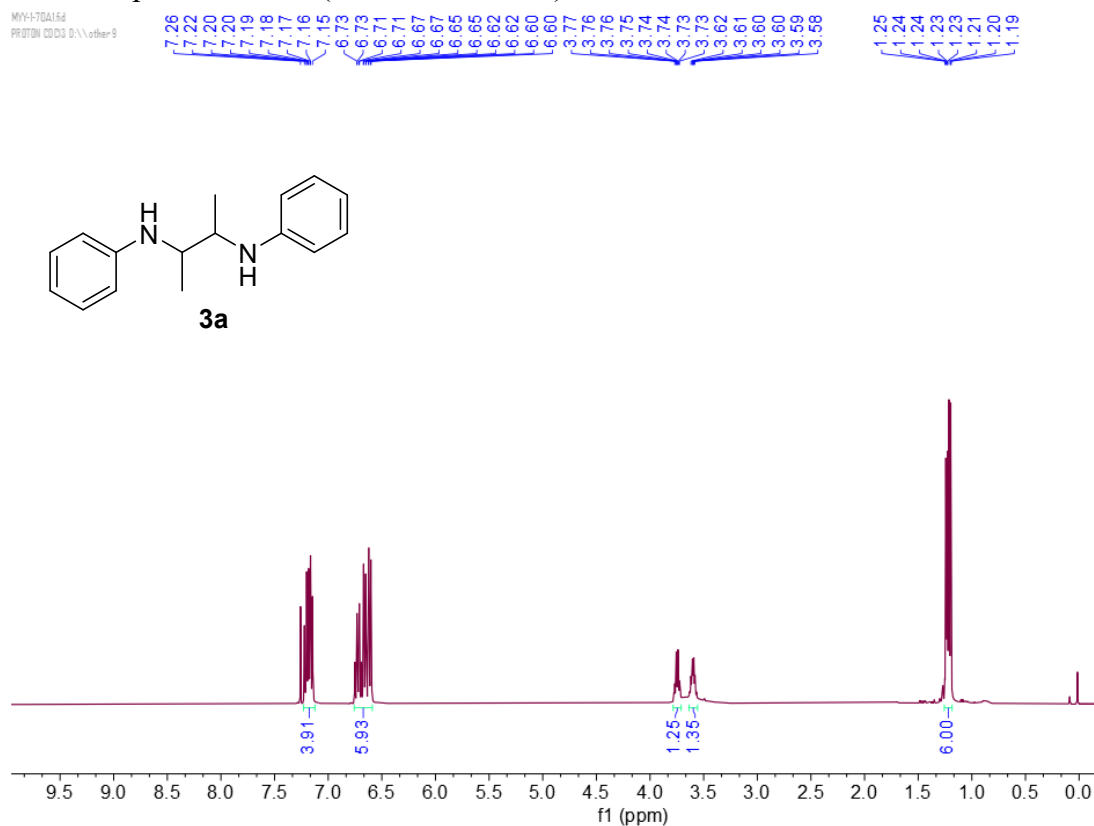

$^{13}\text{C}$ -NMR spectrum of **3a** ( $\text{CDCl}_3$ , 100 MHz)

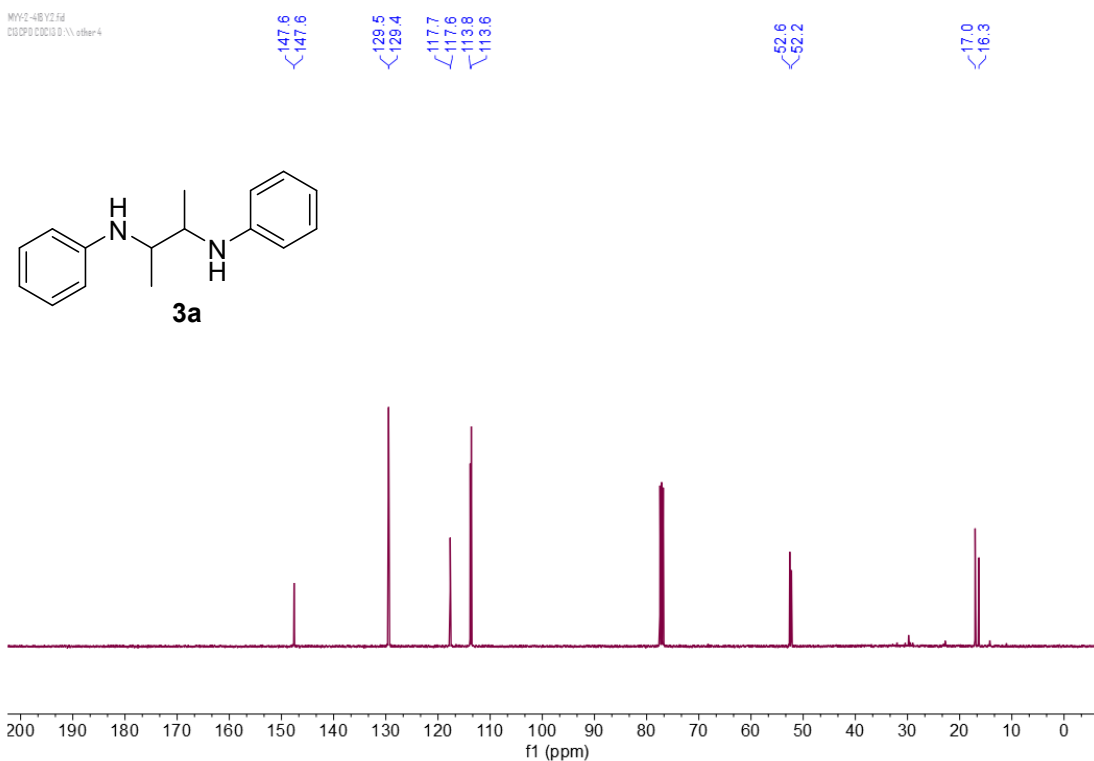

$^1\text{H}$ -NMR spectrum of **3b** ( $\text{CDCl}_3$ , 400 MHz)

MYY-1-98B.4.fid  
 PROTON CDCl3 D:\other 13

7.00 7.00 7.00 7.00 7.00 6.66 6.66 6.65 6.65 6.65 3.71 3.71 3.71 3.55 3.55 3.55 2.22 1.12 1.12 1.12 1.12

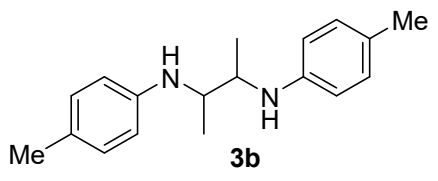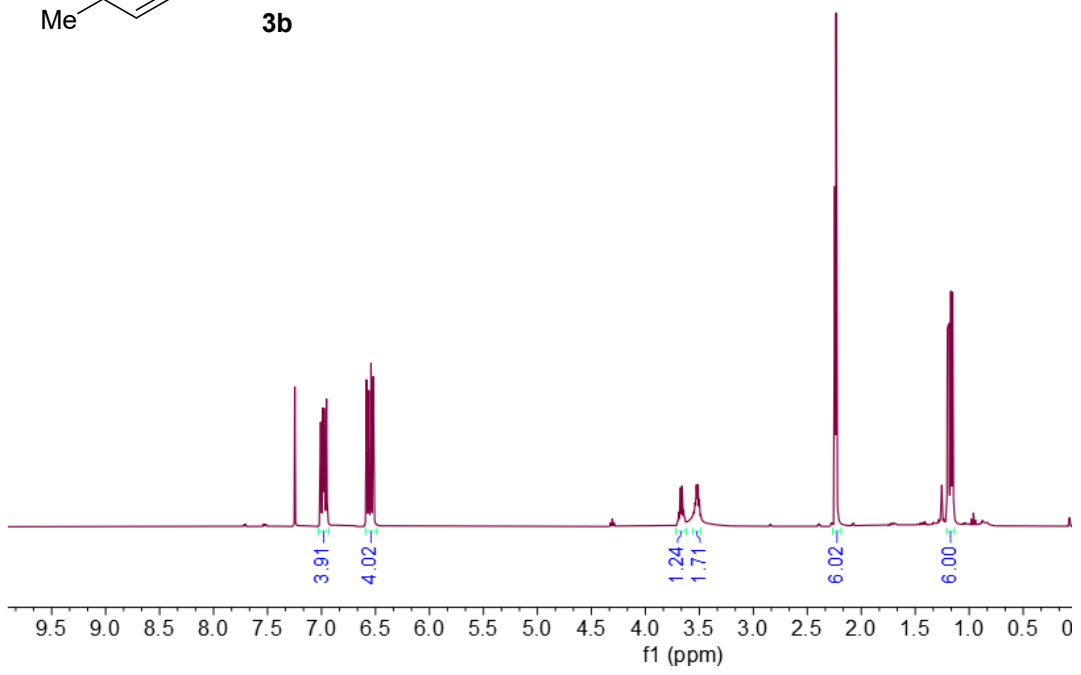

<sup>13</sup>C-NMR spectrum of **3b** (CDCl<sub>3</sub>, 100 MHz)

MYY-1-98B.2.fid  
 C13CPD CDCl3 D:\other 13

145.3 145.2 129.9 129.8 126.9 126.8 114.1 113.9 52.9 52.7 20.4 16.9 16.2

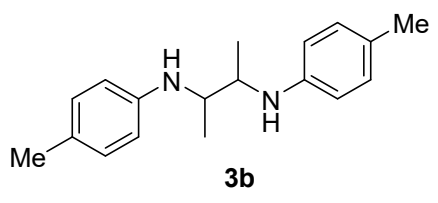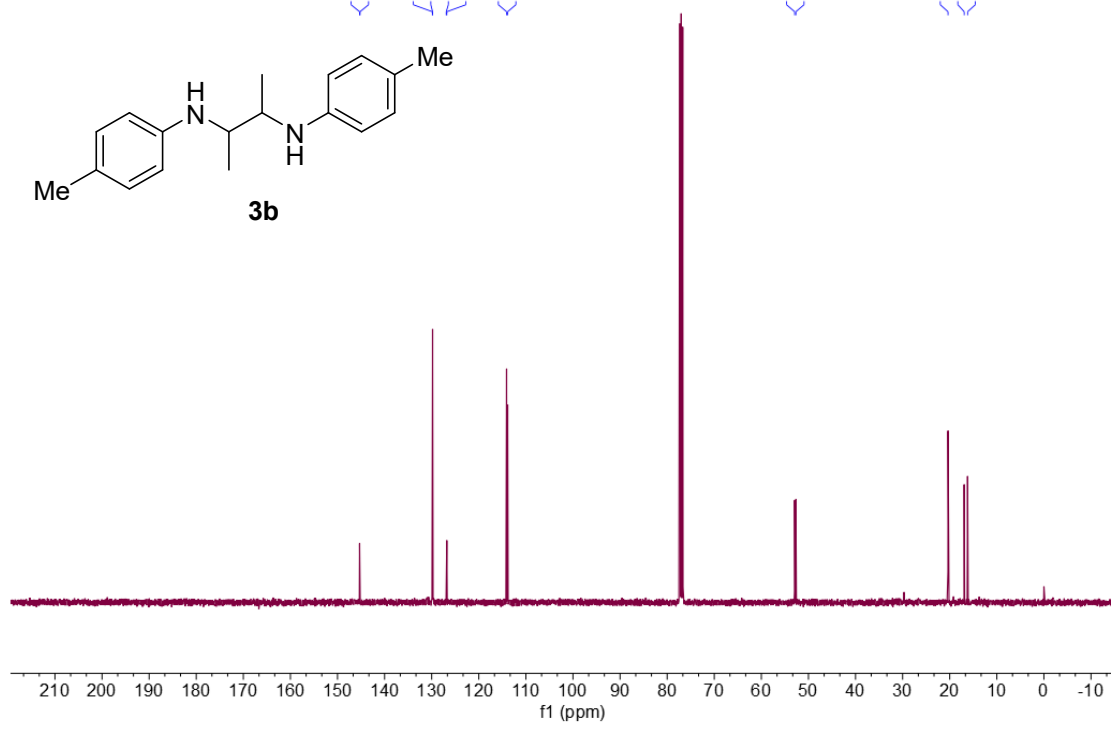

<sup>1</sup>H-NMR spectrum of **3c** (CDCl<sub>3</sub>, 400 MHz)

MYV-2-47B.1.fid  
PROTON CDCl3 D:\other

7.03  
7.02  
7.01  
7.00  
6.98  
6.60  
6.59  
6.58  
6.56  
6.55  
6.54

3.69  
3.68  
3.68  
3.67  
3.66  
3.65  
2.57  
2.56  
2.55  
2.54  
2.53  
2.51  
2.50  
1.21  
1.20  
1.19  
1.17  
1.17  
1.15

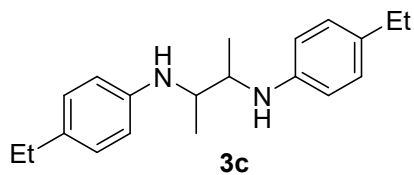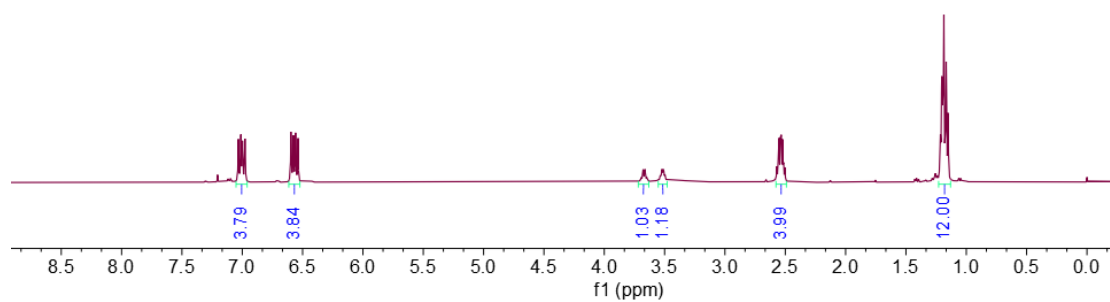

<sup>13</sup>C-NMR spectrum of **3c** (CDCl<sub>3</sub>, 100 MHz)

MYV-2-47B.2.fid  
C13CPD CDCl3 D:\other 10

145.59  
145.53  
133.53  
133.44  
128.75  
128.69  
114.05  
113.80  
52.94  
52.68  
27.97  
17.09  
16.31  
16.02

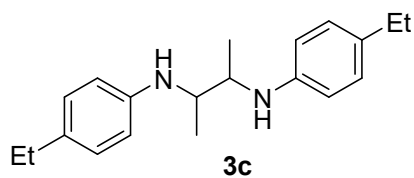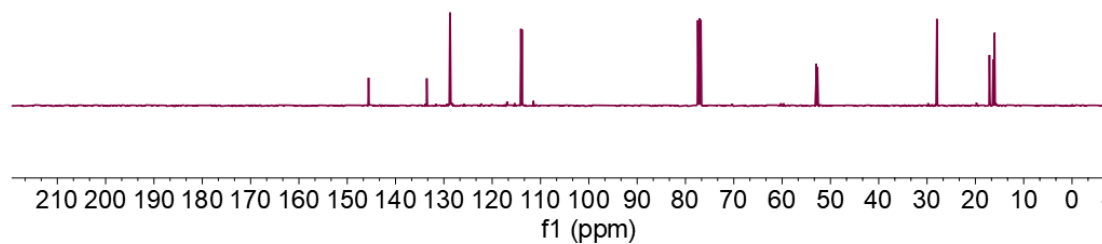

<sup>1</sup>H-NMR spectrum of **3d** (CDCl<sub>3</sub>, 400 MHz)



F-3-40B.1.fid  
 ston\_8 CDCl3 D:\other

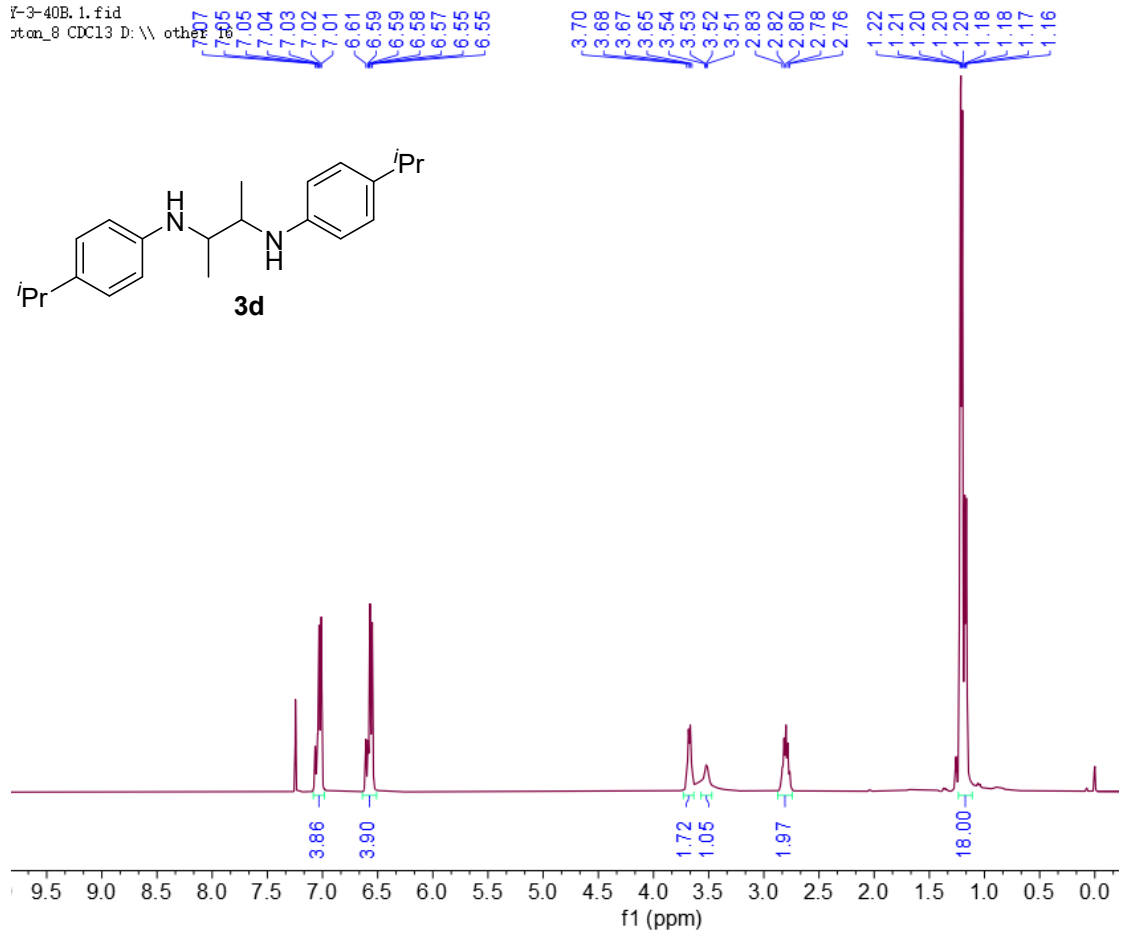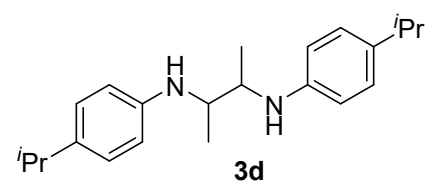

<sup>13</sup>C-NMR spectrum of **3d** (CDCl<sub>3</sub>, 100 MHz)

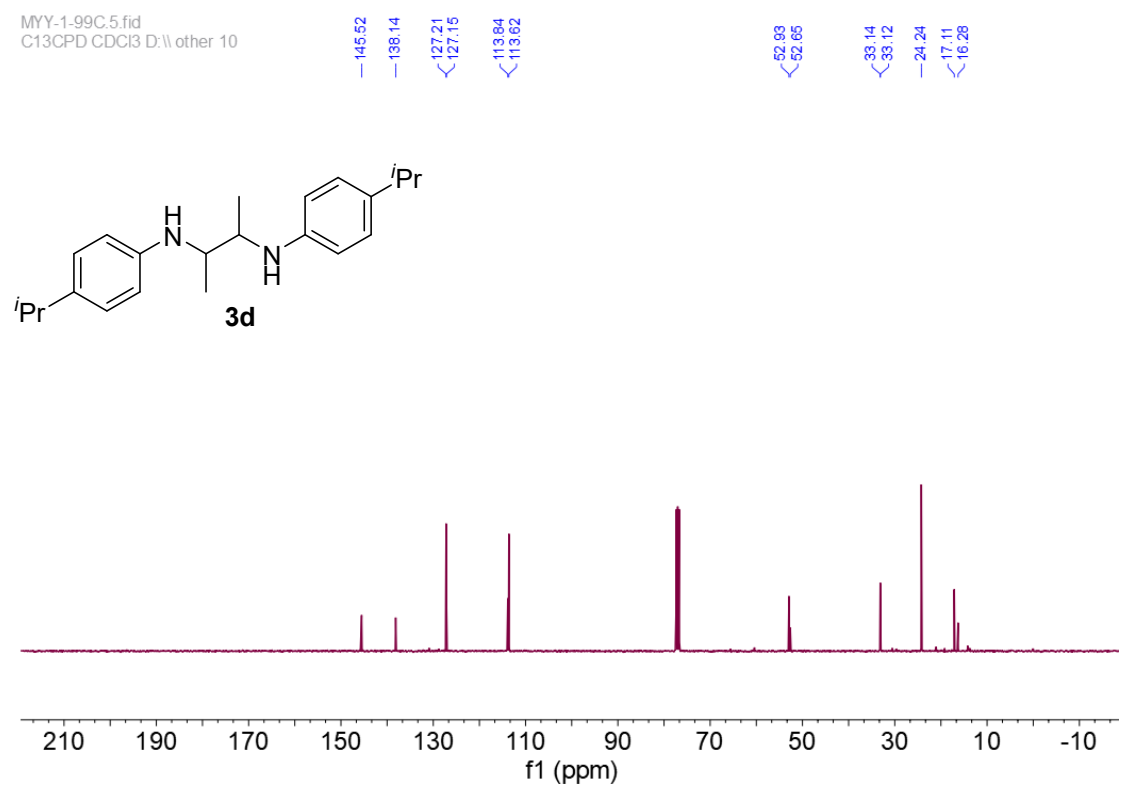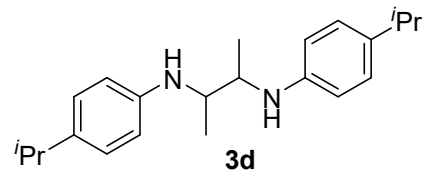

<sup>1</sup>H-NMR spectrum of **3e** (CDCl<sub>3</sub>, 400 MHz)

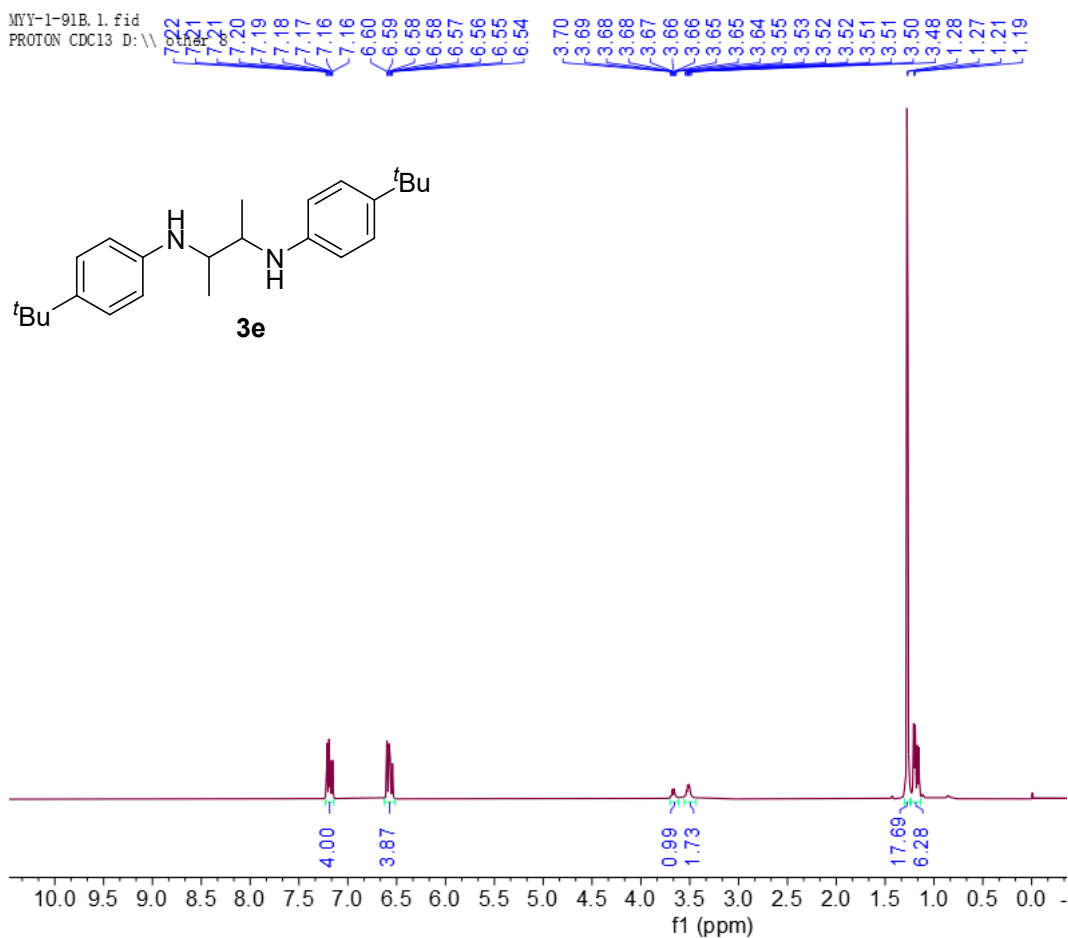

$^{13}\text{C}$ -NMR spectrum of **3e** ( $\text{CDCl}_3$ , 100 MHz)

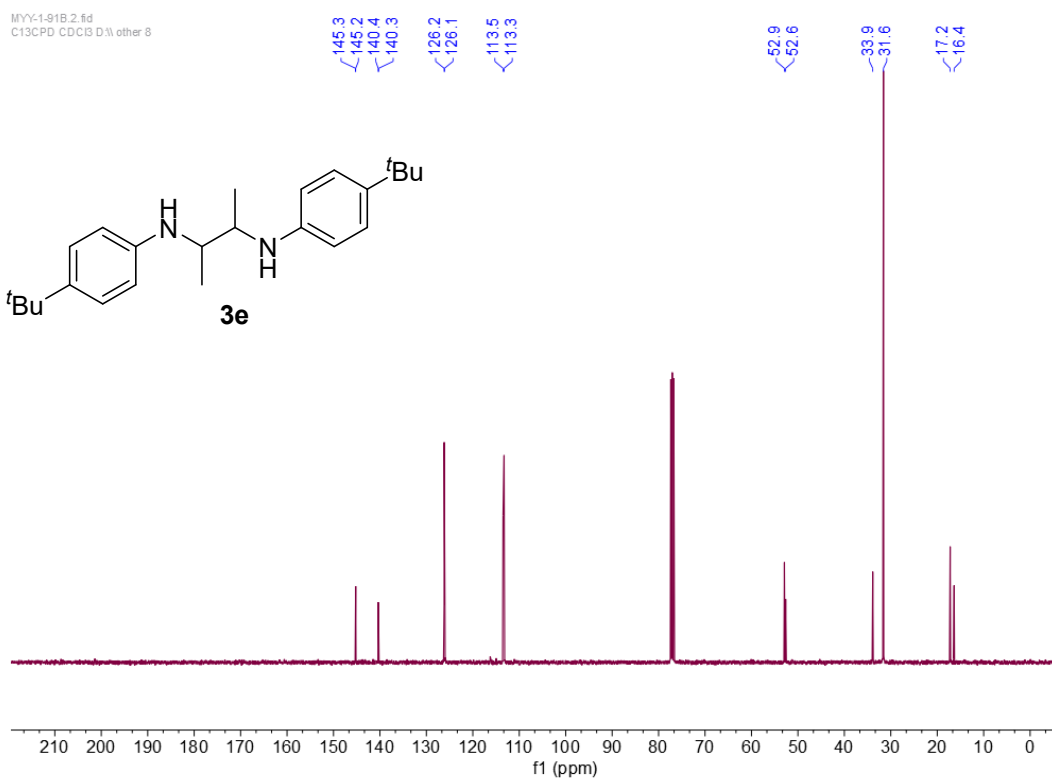

$^1\text{H}$ -NMR spectrum of **3f** ( $\text{CDCl}_3$ , 400 MHz)

MYY-3-37D. 3. fid  
proton\_8 CDC13 D:\ other

6.91 6.89 6.88 6.87 6.85 6.83 6.57 6.56 6.55 6.53 6.52 6.51 6.50 3.63 3.62 3.61 3.47 3.46 3.45 3.44 3.43 3.43 1.20 1.19 1.19 1.17 1.15

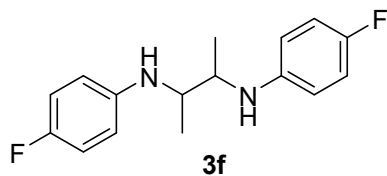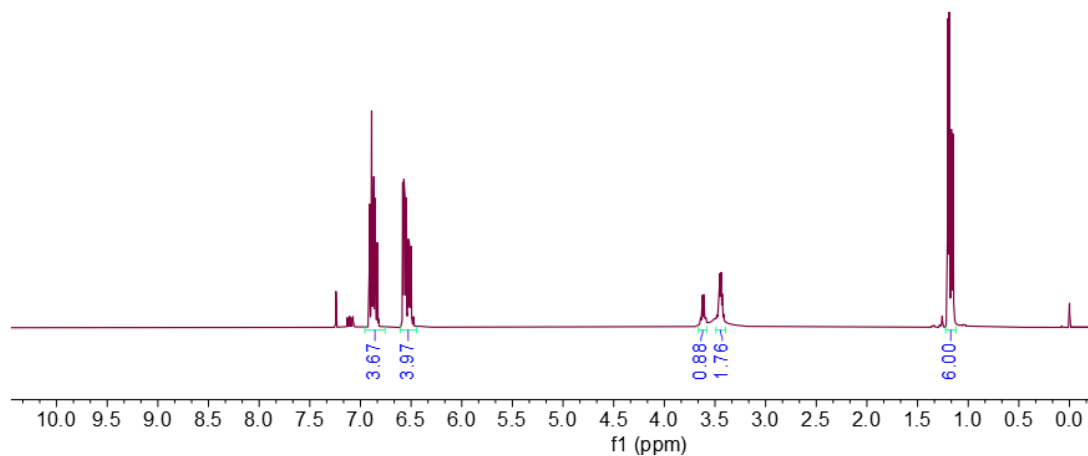

<sup>1</sup>H-NMR spectrum of **3f** (CDCl<sub>3</sub>, 376 MHz)

MYY-3-37D.12.fid  
MYY-3-37D

-127.5  
-127.5  
-127.5

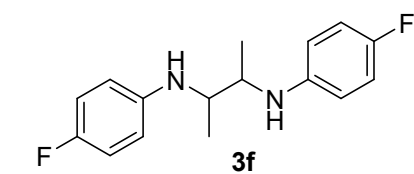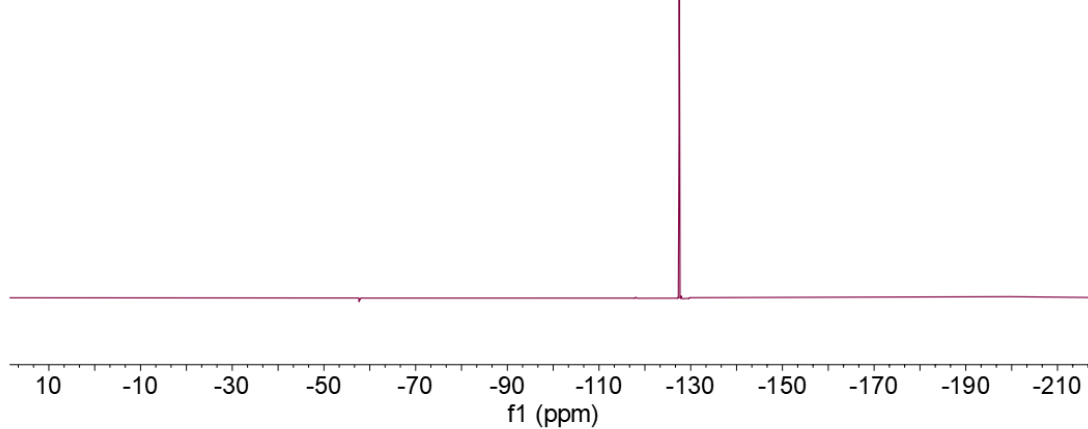

<sup>13</sup>C-NMR spectrum of **3f** (CDCl<sub>3</sub>, 100 MHz)

MYY-3-37D.11.fid  
MYY-3-37D

157.1  
154.8  
143.9  
143.9  
143.9  
159.9  
159.9  
157.7  
144.9  
144.7  
144.6

53.5  
53.0

17.0  
16.1

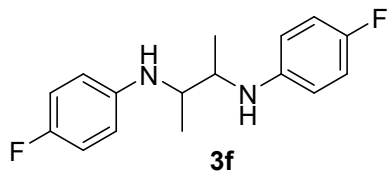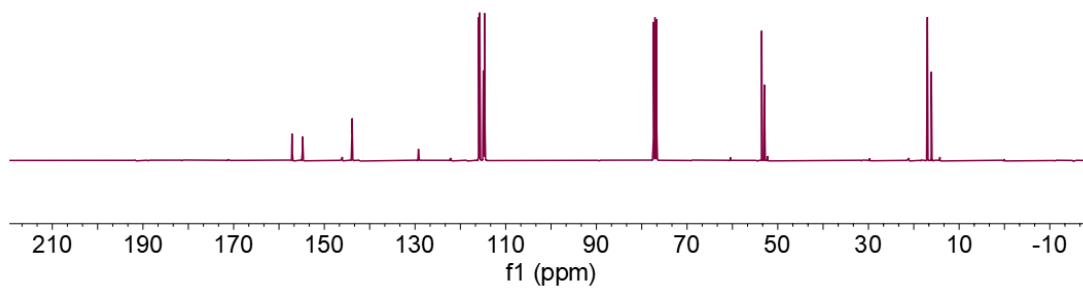

<sup>1</sup>H-NMR spectrum of **3g** (CDCl<sub>3</sub>, 400 MHz)

MYY-3-31C.1.fid  
proton\_8 CDCl3 D:\other 10

7.73  
7.72  
7.71  
7.11  
7.09  
7.09  
7.08  
7.07  
6.55  
6.54  
6.53  
6.53  
6.50  
6.49  
6.48  
6.47

3.66  
3.65  
3.63  
3.60  
3.51  
3.50  
3.49  
3.49

1.20  
1.19  
1.18  
1.17  
1.16

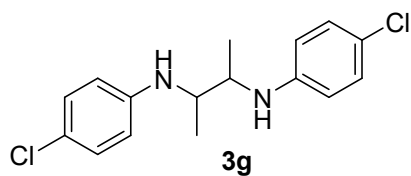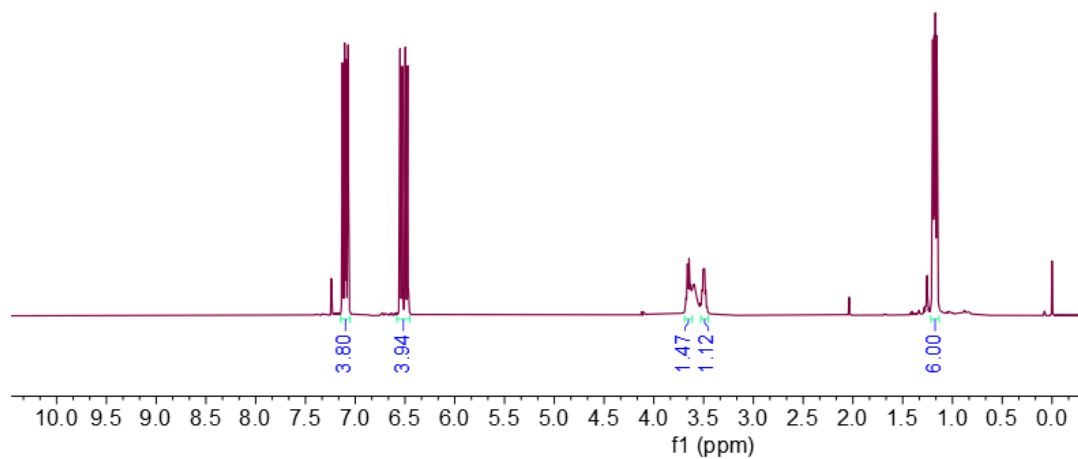

$^{13}\text{C}$ -NMR spectrum of **3g** ( $\text{CDCl}_3$ , 100 MHz)

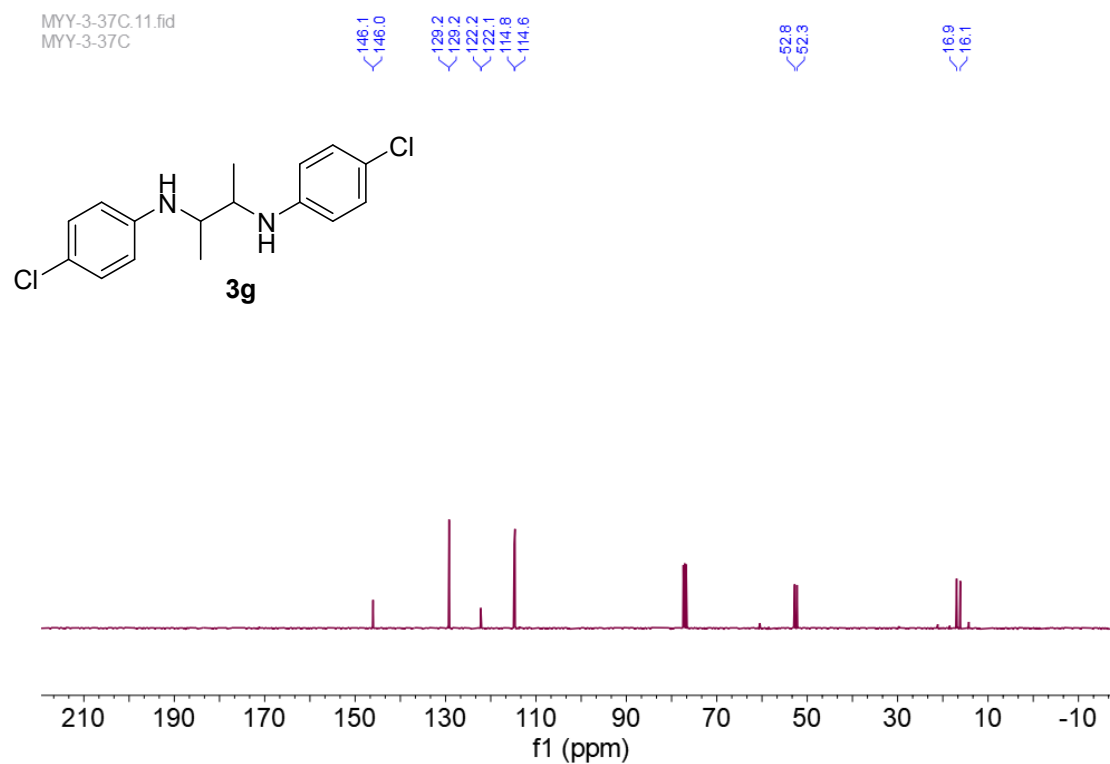

$^1\text{H}$ -NMR spectrum of **3h** ( $\text{CDCl}_3$ , 400 MHz)

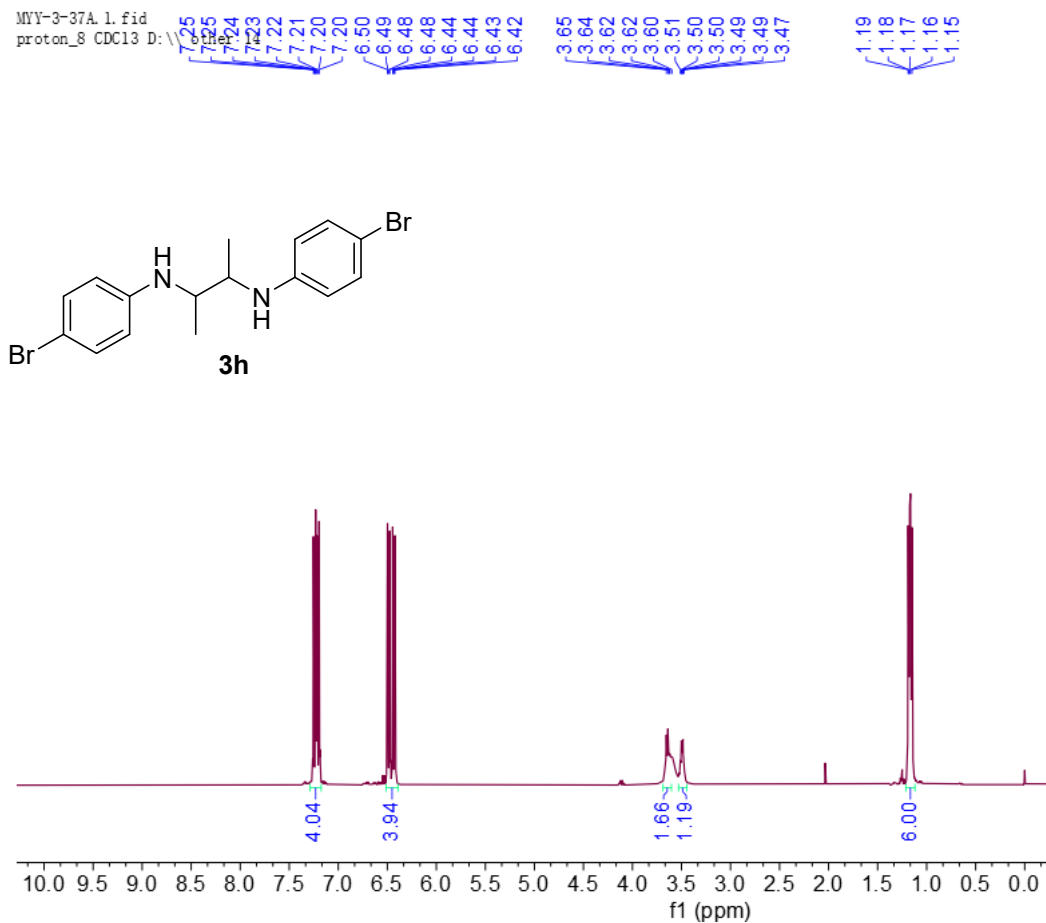

<sup>13</sup>C-NMR spectrum of **3h** (CDCl<sub>3</sub>, 100 MHz)

MYY-3-37A.11.fid  
MYY-3-37A

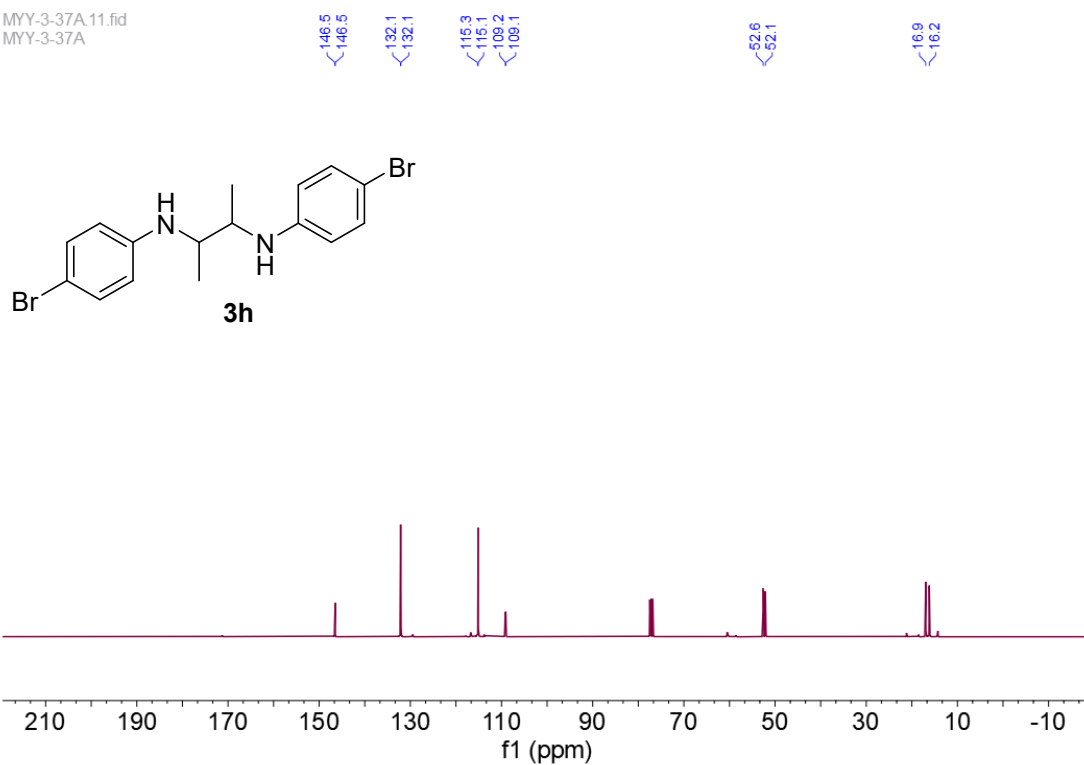

<sup>1</sup>H-NMR spectrum of **3i** (CDCl<sub>3</sub>, 400 MHz)

MYY-3-40A.1.164  
proton\_8 CDCl<sub>3</sub> D<sub>2</sub>O

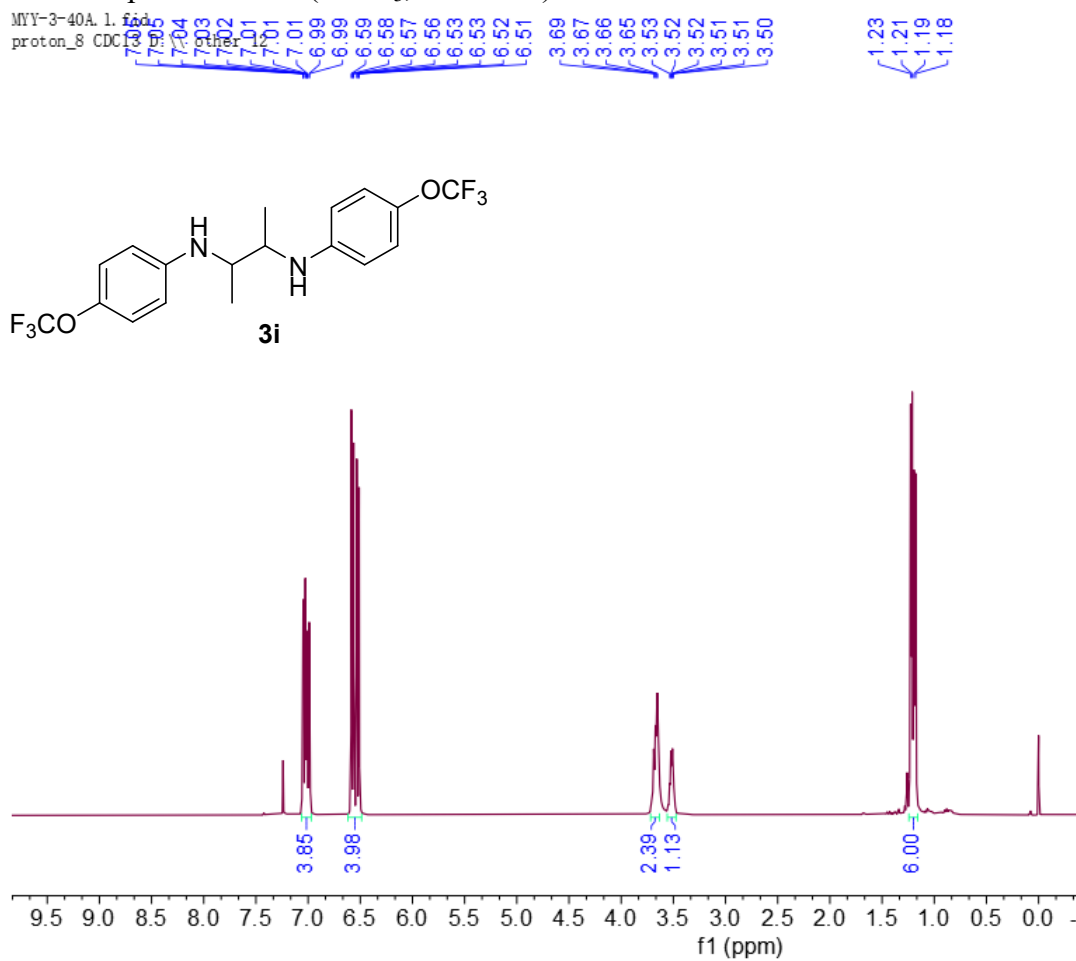

<sup>19</sup>F-NMR spectrum of **3i** (CDCl<sub>3</sub>, 376 MHz)

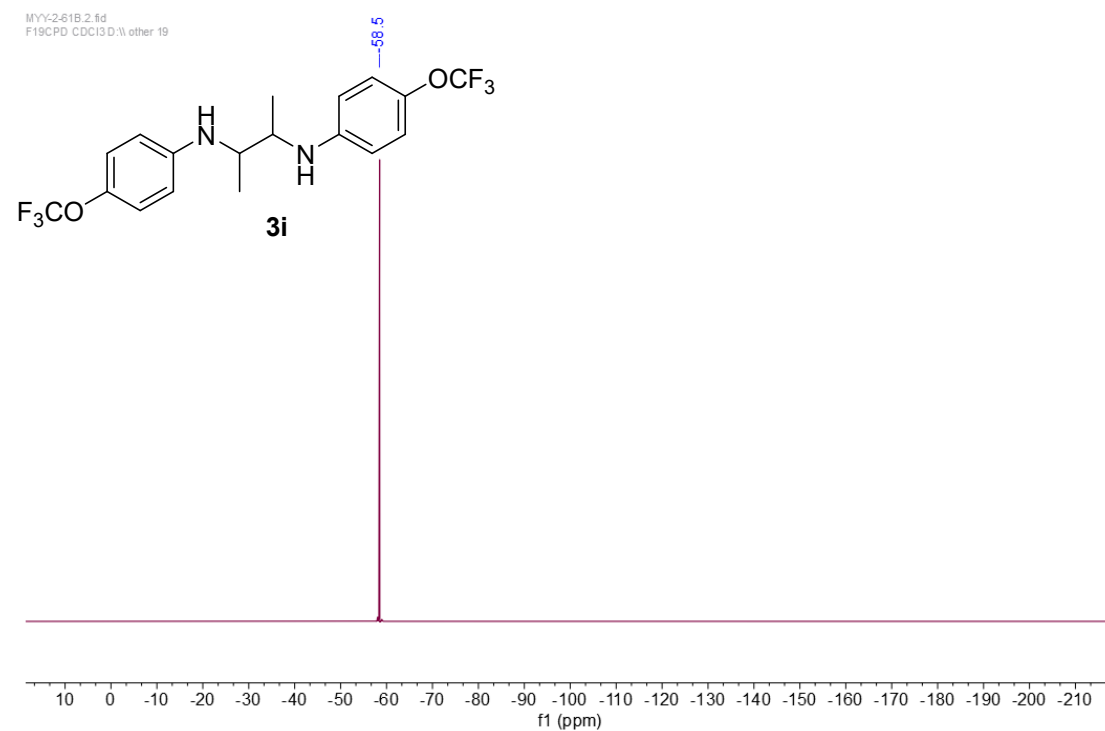

<sup>13</sup>C-NMR spectrum of **3i** (CDCl<sub>3</sub>, 100 MHz)

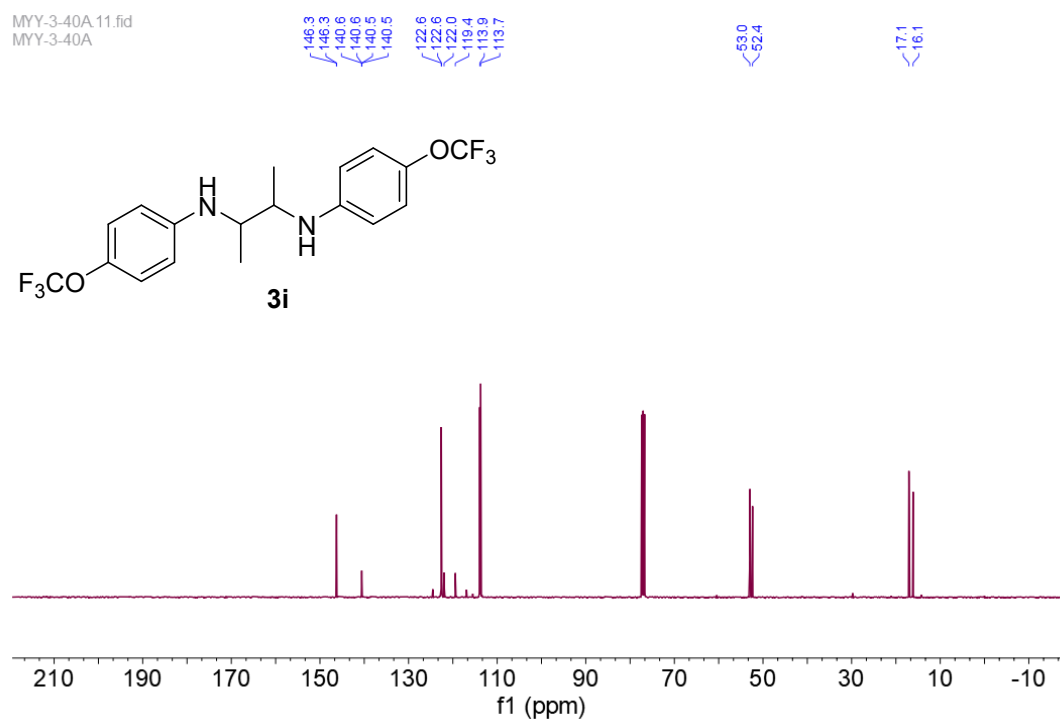

### <sup>1</sup>H-NMR spectrum of **3j** (CDCl<sub>3</sub>, 400 MHz)

MYY-2-26D.1.fid  
PROTON CDCl<sub>3</sub>

7.99, 7.97, 7.96, 7.95, 7.05, 7.04, 7.03, 7.02, 6.55, 6.54, 6.53, 6.53, 6.53, 6.51, 6.49, 6.48, 6.47, 6.47, 6.45, 6.45, 6.43, 6.42, 6.41, 6.41, 3.73, 3.72, 3.71, 3.70, 3.60, 3.59, 3.57, 3.57, 3.56, 2.28, 2.24, 1.21, 1.20, 1.19, 1.19, 1.18, 1.17

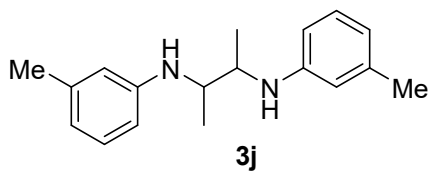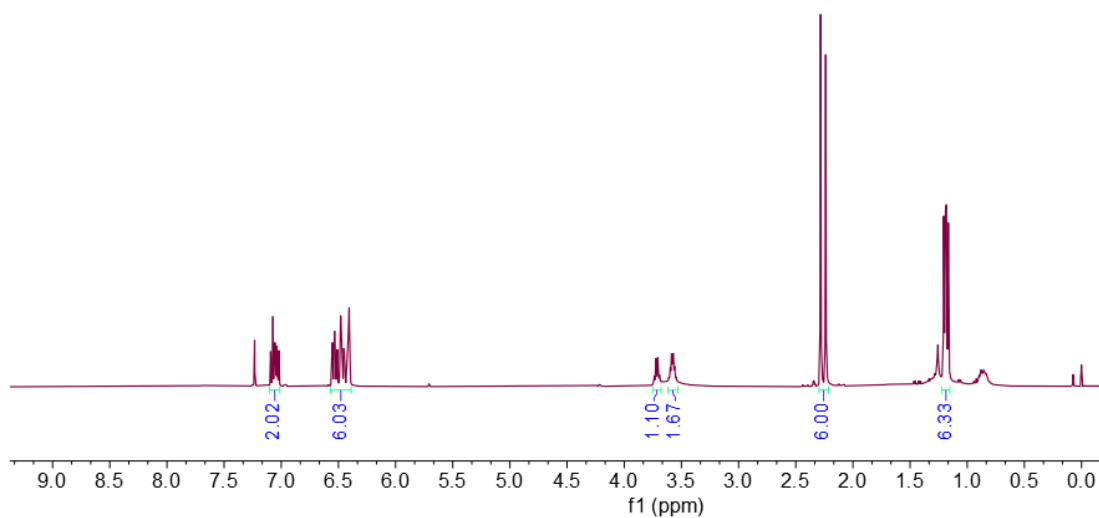

### <sup>13</sup>C-NMR spectrum of **3j** (CDCl<sub>3</sub>, 100 MHz)

MYY-2-26DY2.fid  
C13CPD CDCl<sub>3</sub> D:\other 3

147.6, 147.6, 139.2, 139.2, 129.3, 129.3, 128.9, 118.6, 118.5, 114.6, 114.4, 110.9, 110.8

52.4, 52.2

21.7, 21.7, 16.9, 16.4

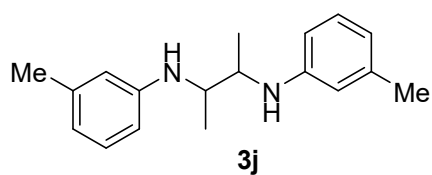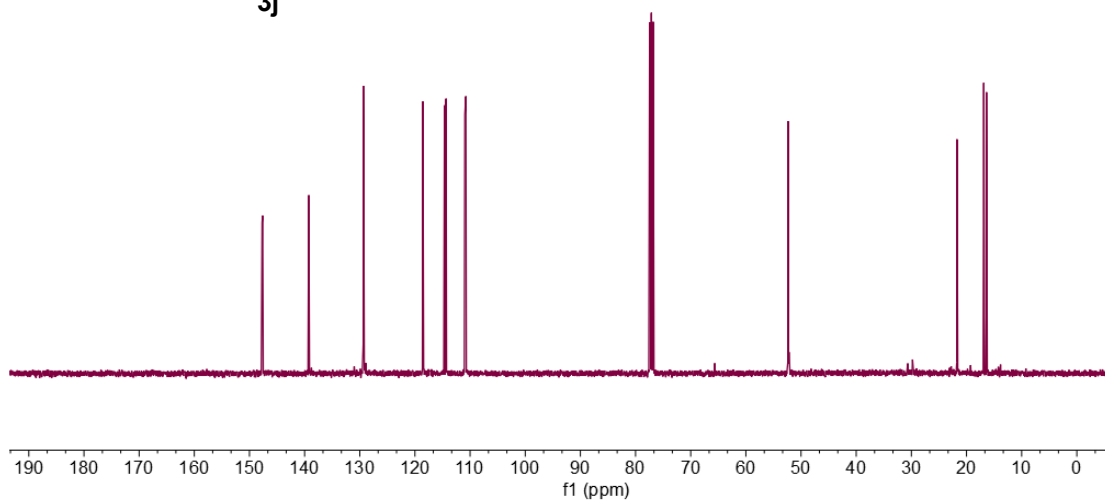



### <sup>1</sup>H-NMR spectrum of **3k** (CDCl<sub>3</sub>, 400 MHz)

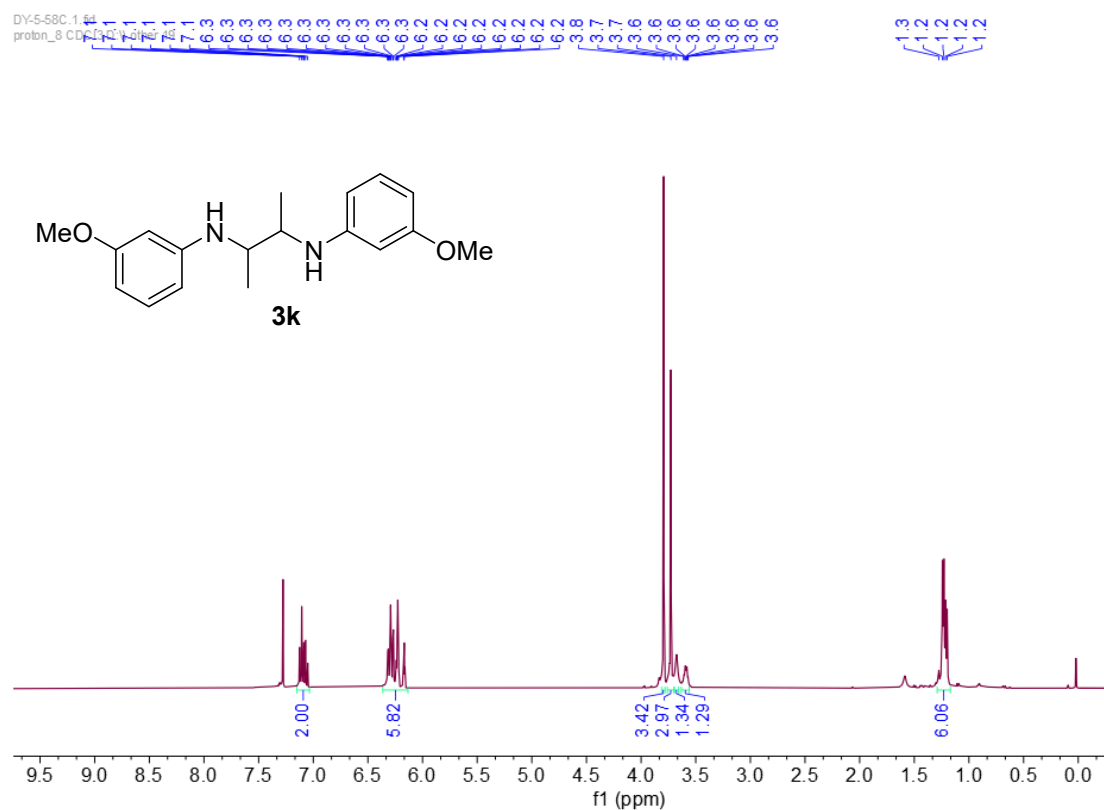

### <sup>13</sup>C-NMR spectrum of **3k** (CDCl<sub>3</sub>, 100 MHz)

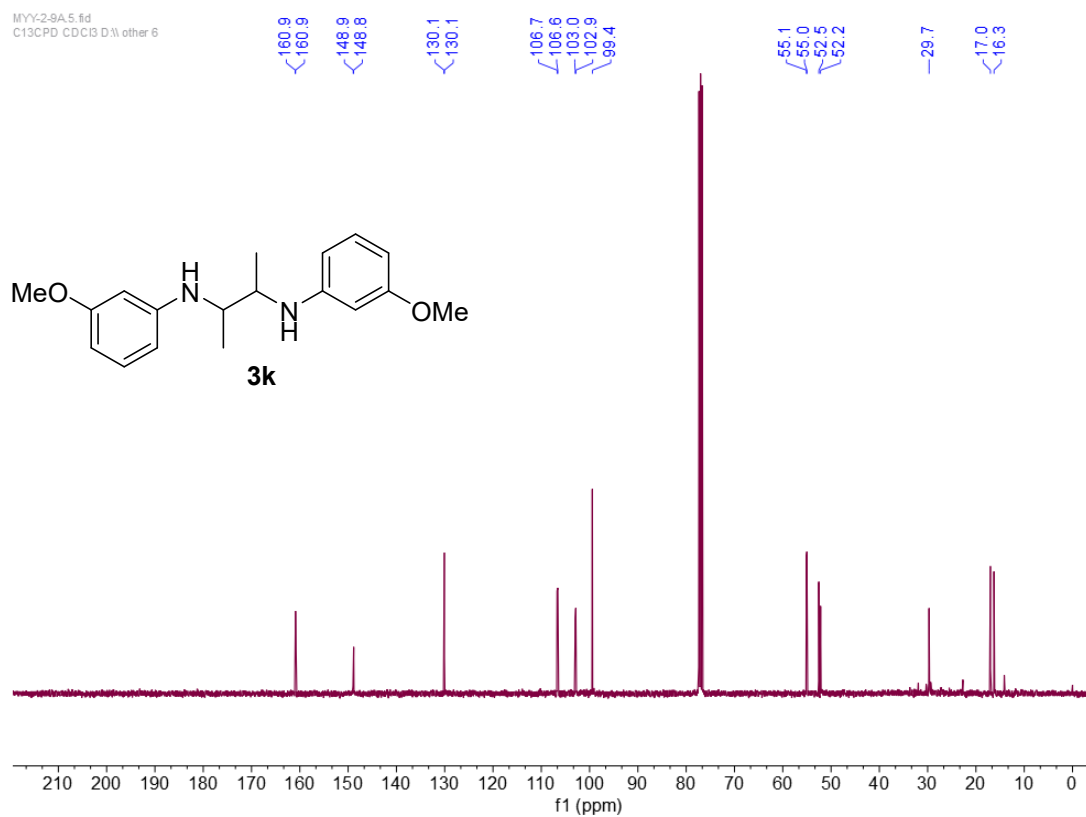

<sup>1</sup>H-NMR spectrum of **31** (CDCl<sub>3</sub>, 400 MHz)

MYY-2-47A3.fid  
PROTON CDCl3 D:\other19

7.12, 7.10, 7.09, 7.08, 7.07, 7.06, 7.05, 6.56, 6.54, 6.50, 6.49, 6.48, 6.47, 6.46, 6.44, 6.42, 6.41, 3.73, 3.71, 3.71, 3.61, 3.60, 3.59, 3.59, 3.58, 3.57, 2.60, 2.58, 2.56, 2.55, 2.54, 2.54, 2.52, 2.50, 1.24, 1.22, 1.20, 1.19, 1.18, 1.16

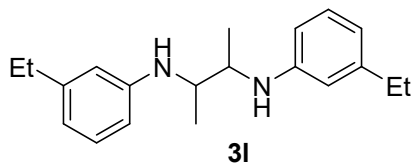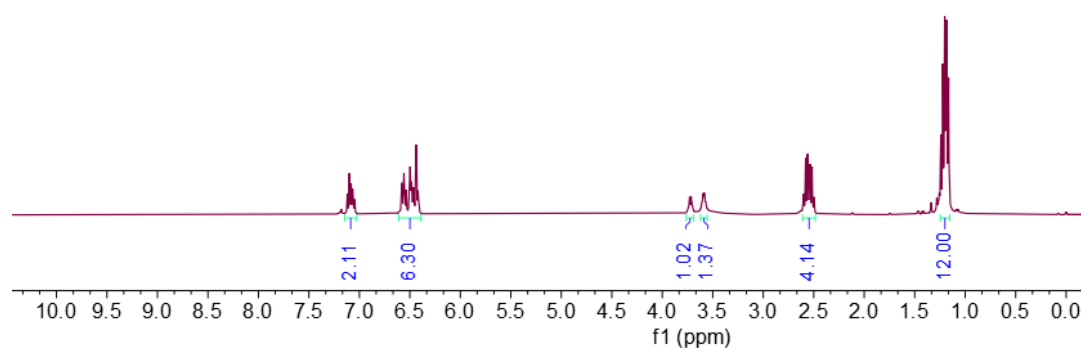

<sup>13</sup>C-NMR spectrum of **31** (CDCl<sub>3</sub>, 100 MHz)

MYY-2-47A.4.fid  
C13CPD CDCl3 D:\other19

147.8, 147.7, 145.7, 145.6, 129.4, 129.3, 117.4, 117.3, 113.6, 113.3, 111.1, 110.9, 52.4, 52.3, 29.1, 29.1, 16.9, 16.4, 15.7, 15.6

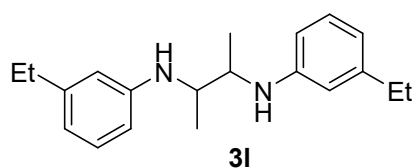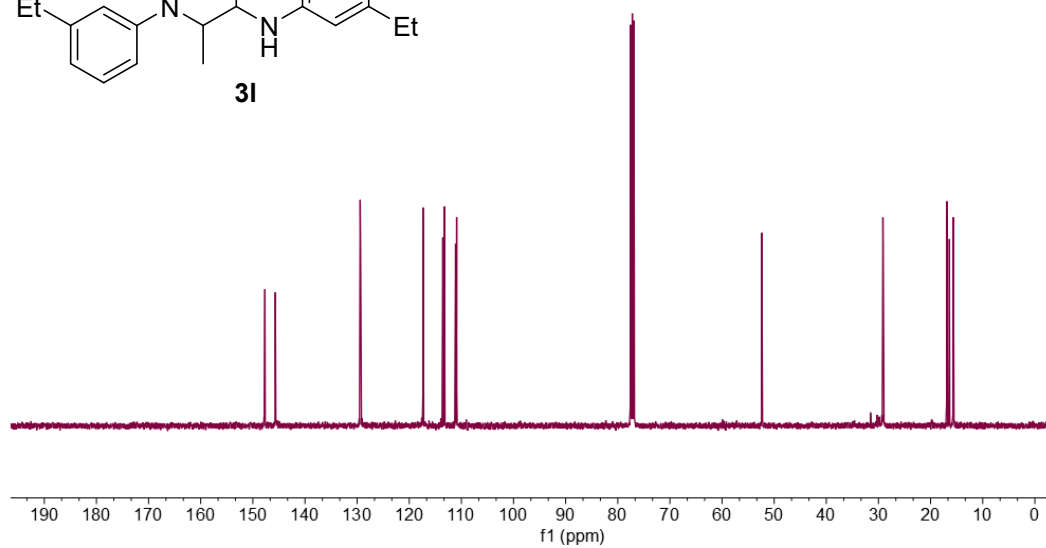

<sup>1</sup>H-NMR spectrum of **3m** (CDCl<sub>3</sub>, 400 MHz)

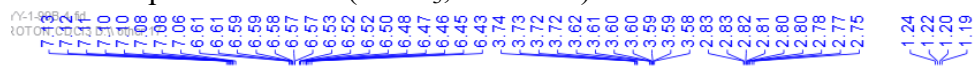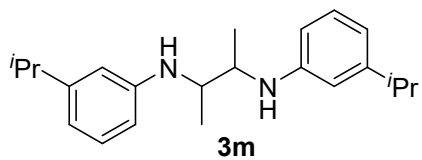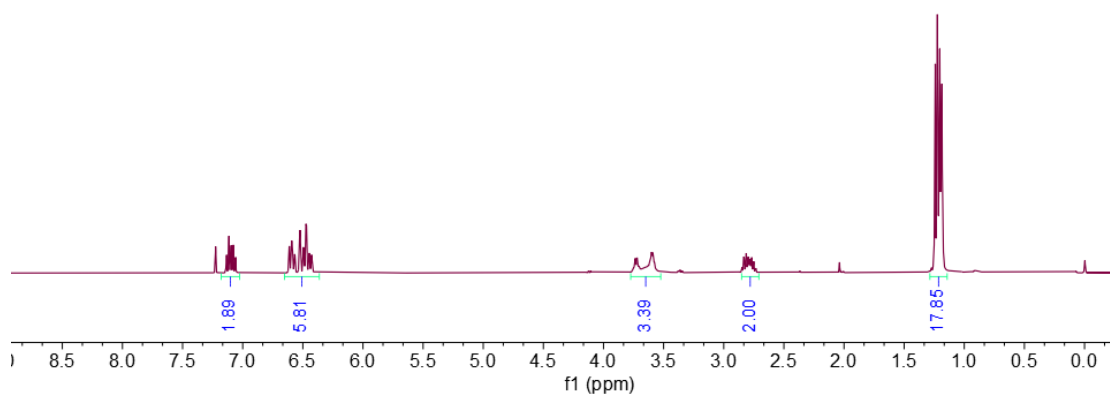

<sup>13</sup>C-NMR spectrum of **3m** (CDCl<sub>3</sub>, 100 MHz)

MY-1-99B 7.fid  
C13CPD CDCB.D\ other 1

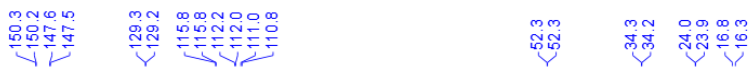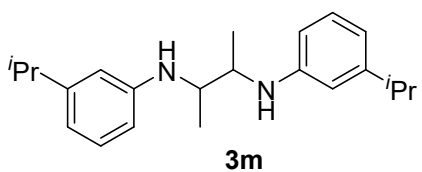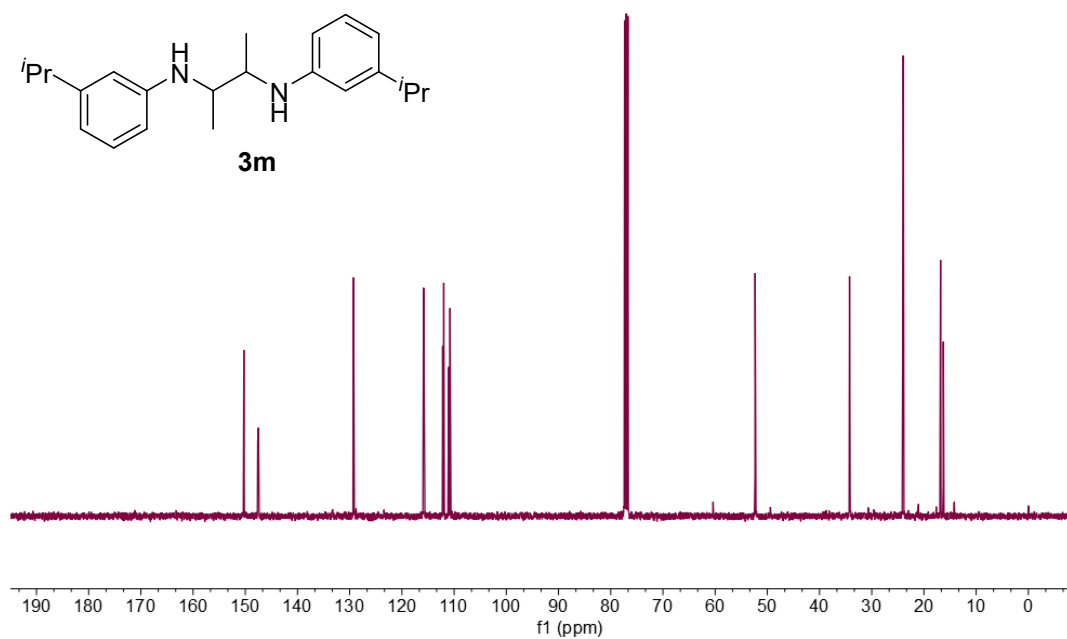

$^1\text{H-NMR}$  spectrum of **3n** ( $\text{CDCl}_3$ , 400 MHz)

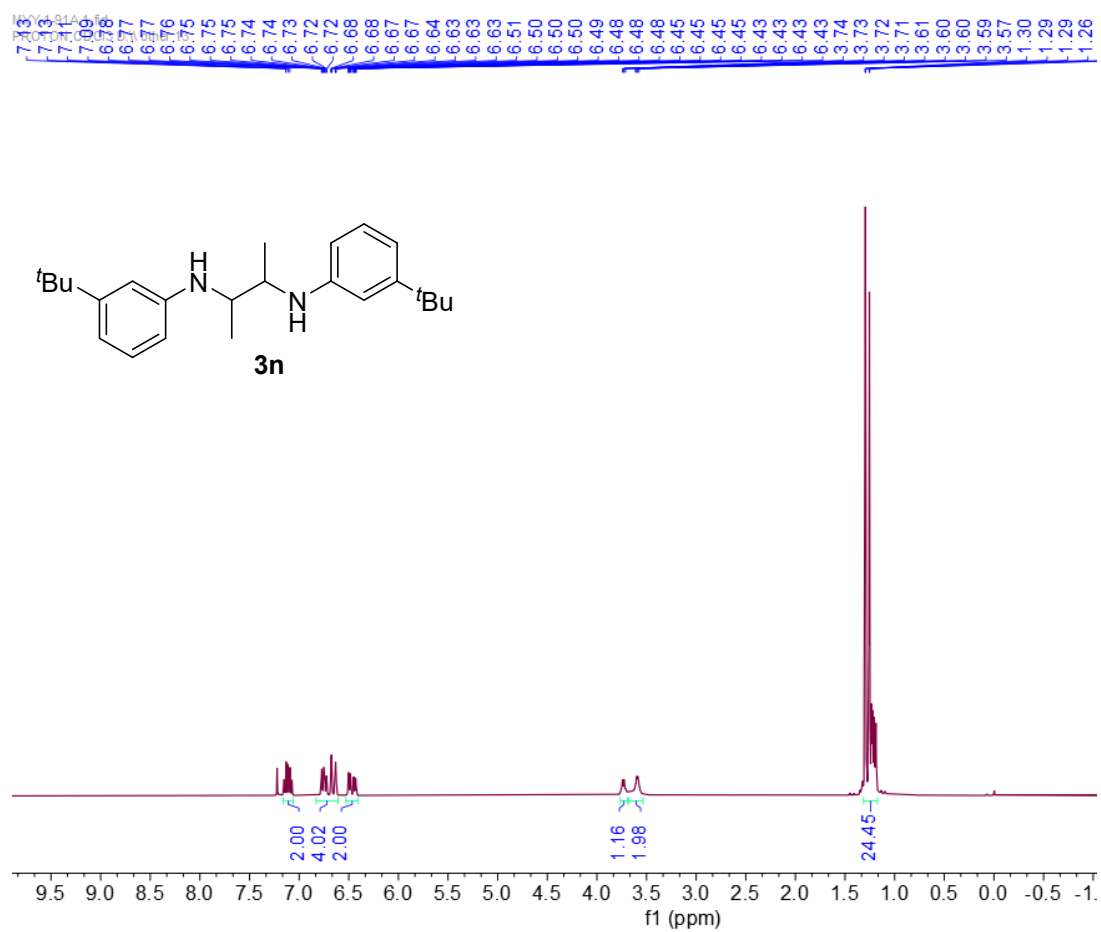

$^{13}\text{C-NMR}$  spectrum of **3n** ( $\text{CDCl}_3$ , 100 MHz)

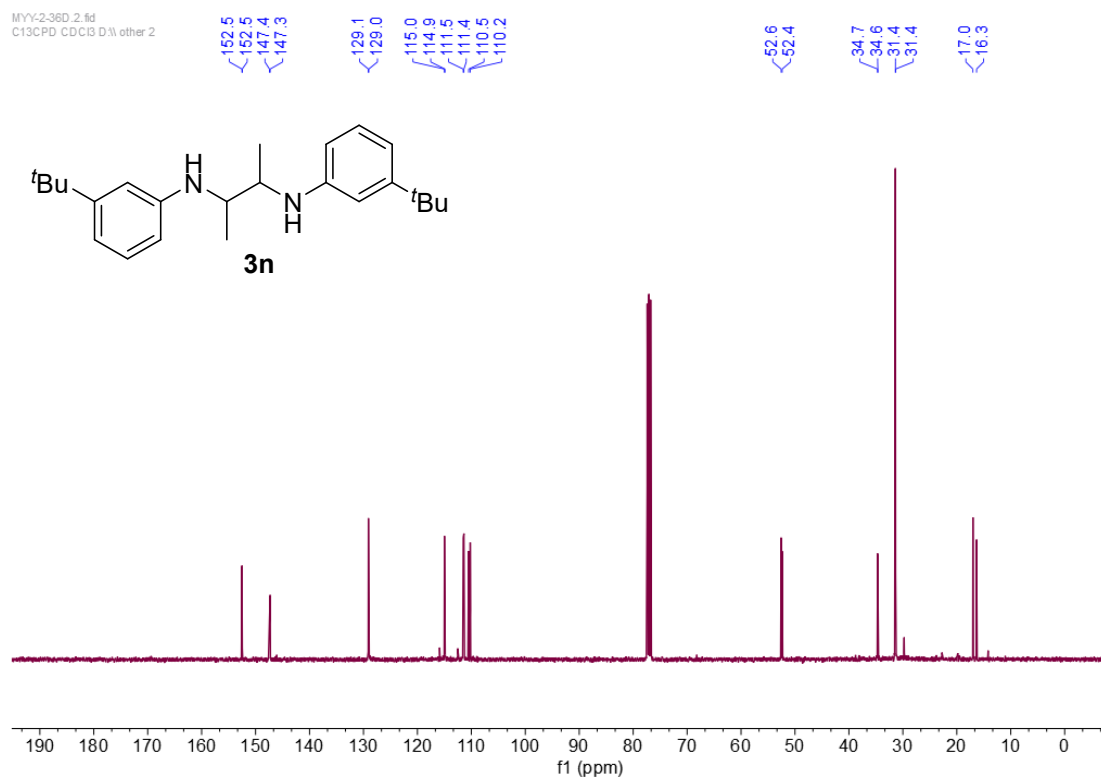

### <sup>1</sup>H-NMR spectrum of **3o** (CDCl<sub>3</sub>, 400 MHz)

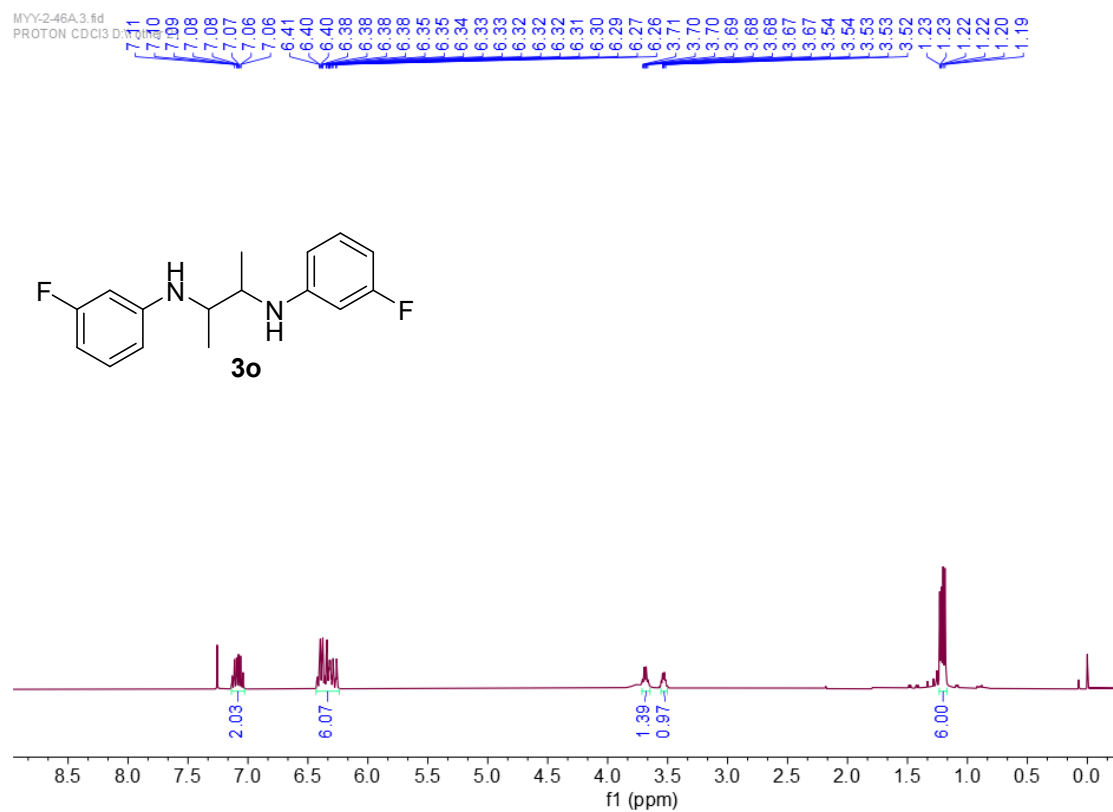

### <sup>19</sup>F-NMR spectrum of **3o** (CDCl<sub>3</sub>, 376 MHz)

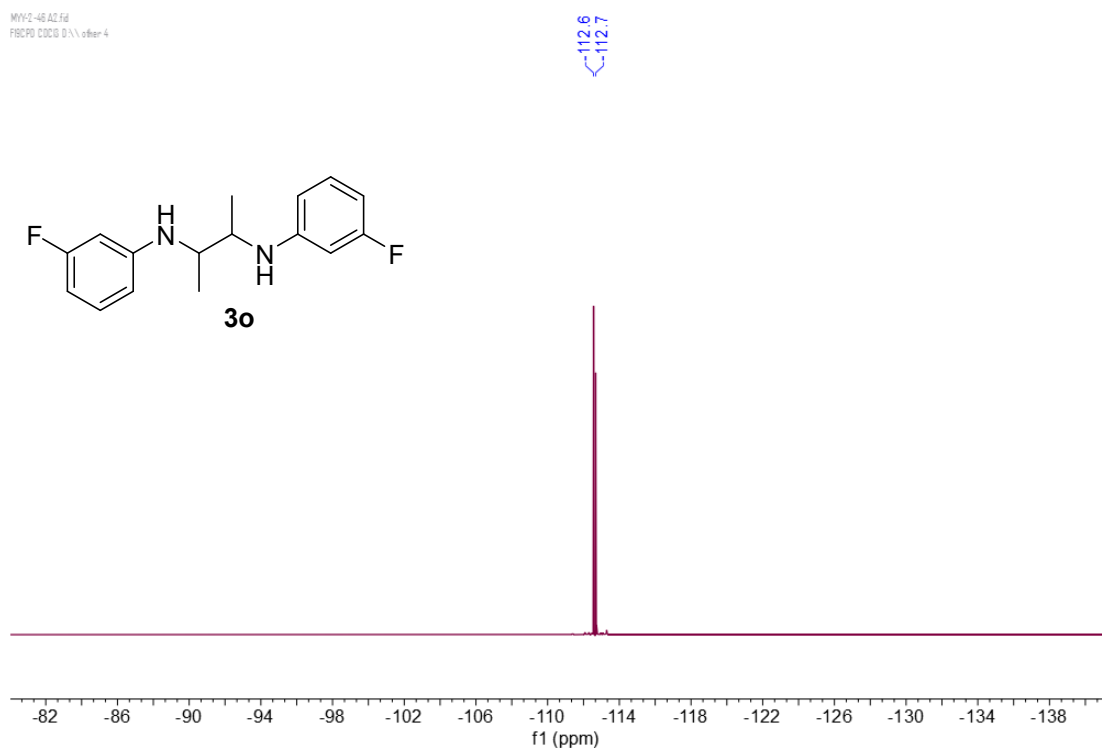

$^{13}\text{C}$ -NMR spectrum of **3o** ( $\text{CDCl}_3$ , 100 MHz)

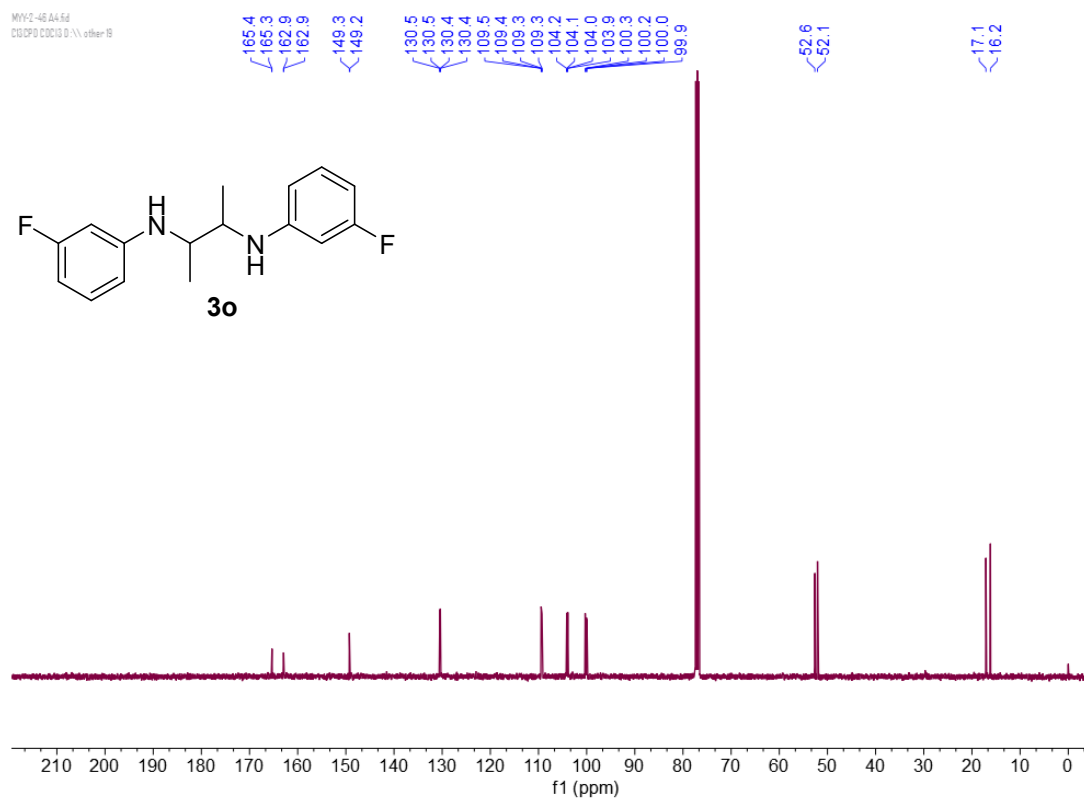

$^1\text{H}$ -NMR spectrum of **3p** ( $\text{CDCl}_3$ , 400 MHz)

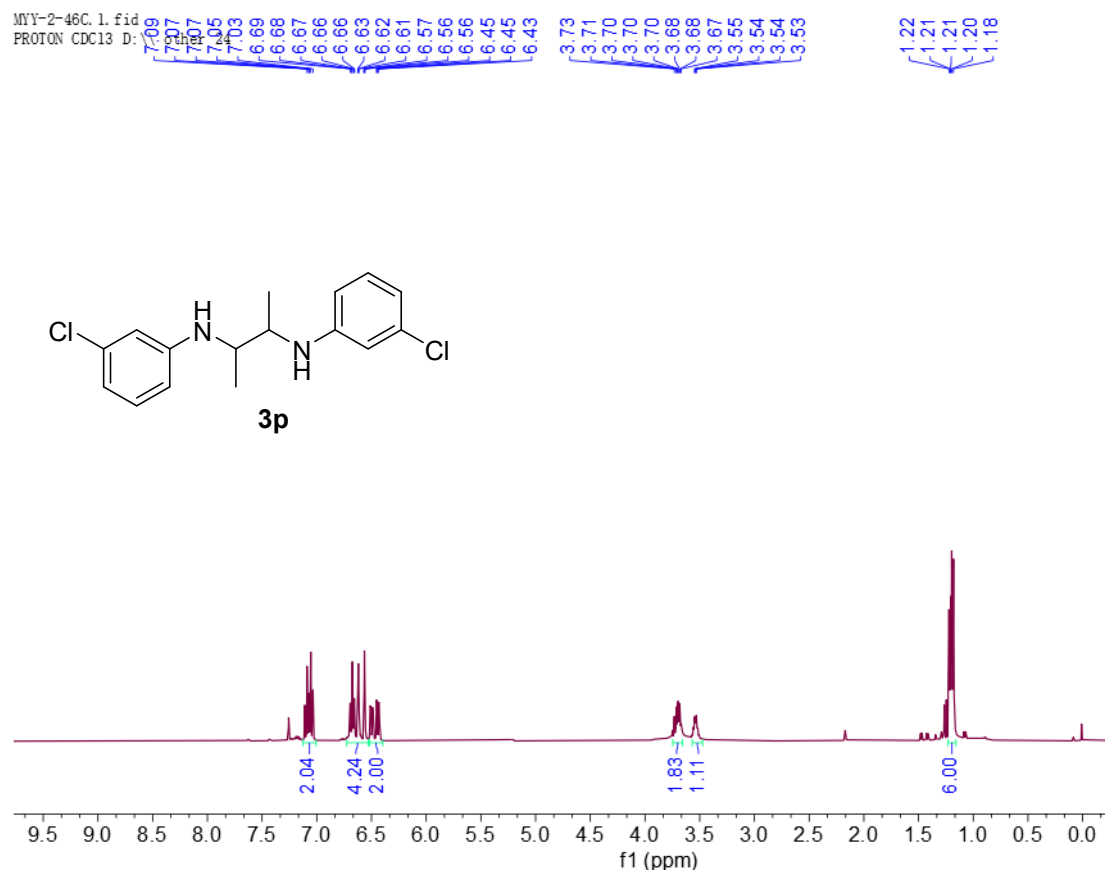

$^{13}\text{C}$ -NMR spectrum of **3p** ( $\text{CDCl}_3$ , 100 MHz)

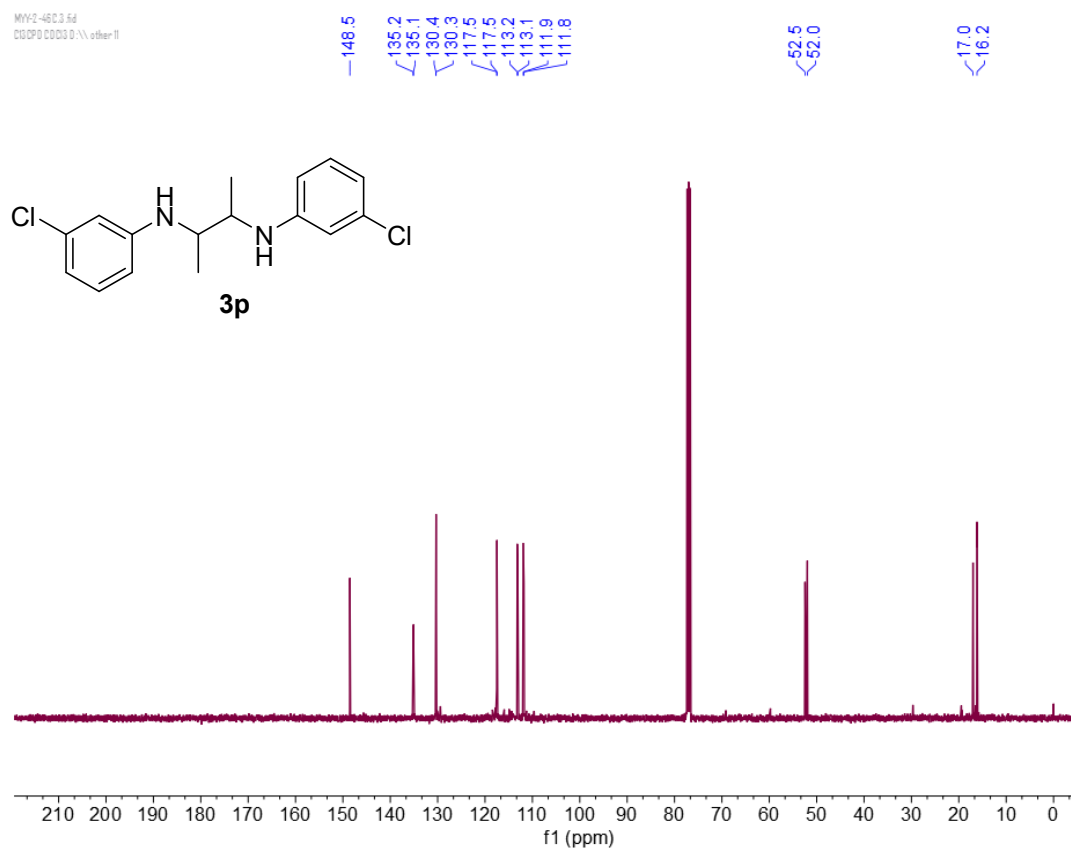

$^1\text{H}$ -NMR spectrum of **3q** ( $\text{CDCl}_3$ , 400 MHz)

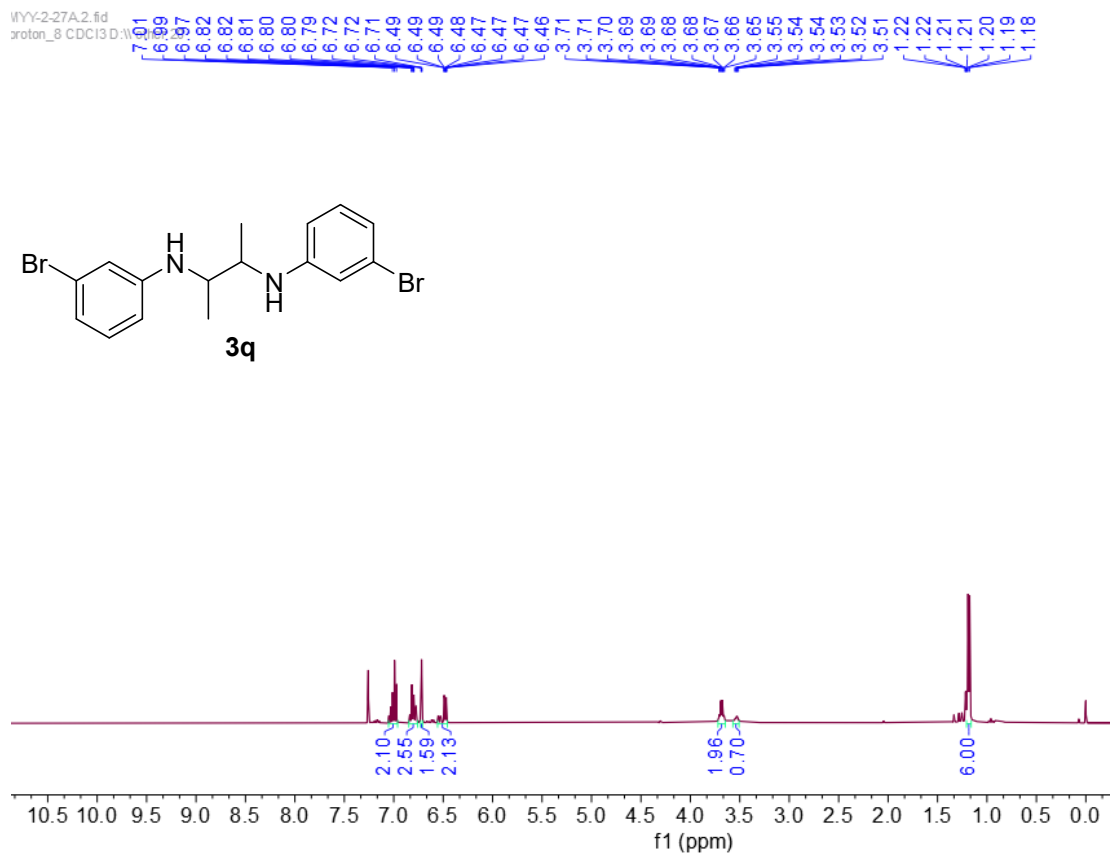

<sup>13</sup>C-NMR spectrum of **3q** (CDCl<sub>3</sub>, 100 MHz)

MY-2-27A.3.fid  
C13CPD CDCl3.D\\ other 8

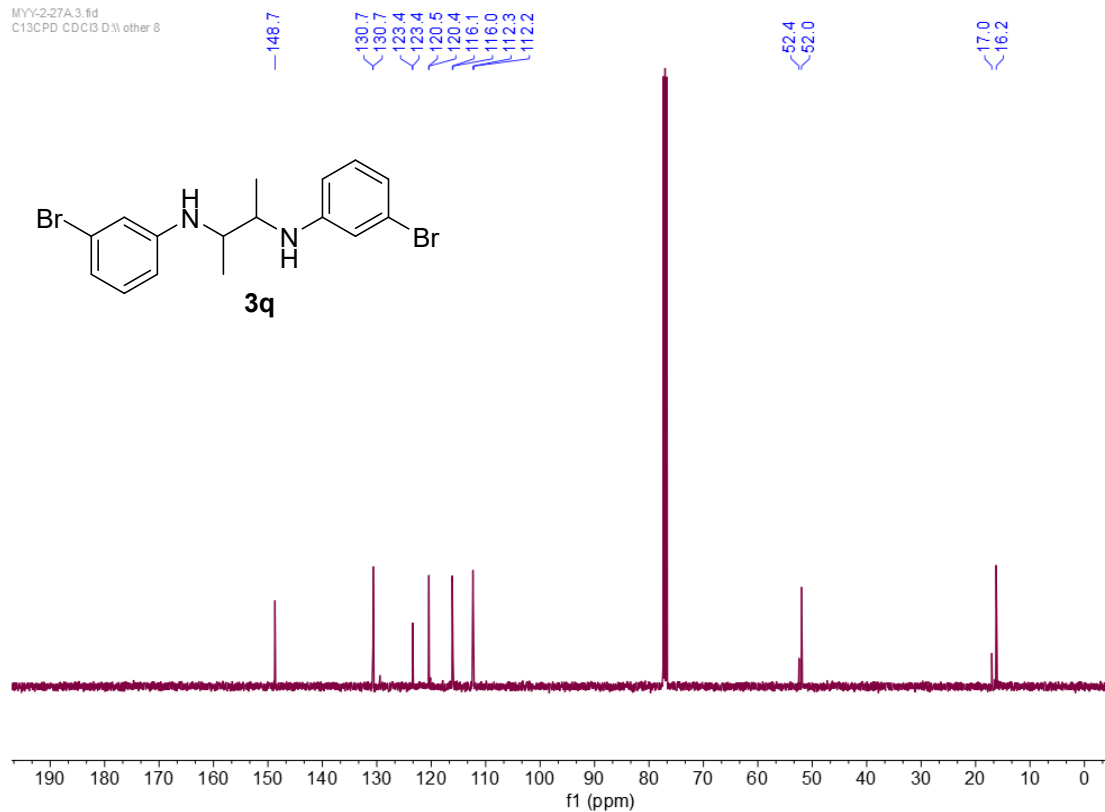

<sup>1</sup>H-NMR spectrum of **3r** (CDCl<sub>3</sub>, 400 MHz)

MY-2-58A.3.fid  
proton\_8 CDCl3

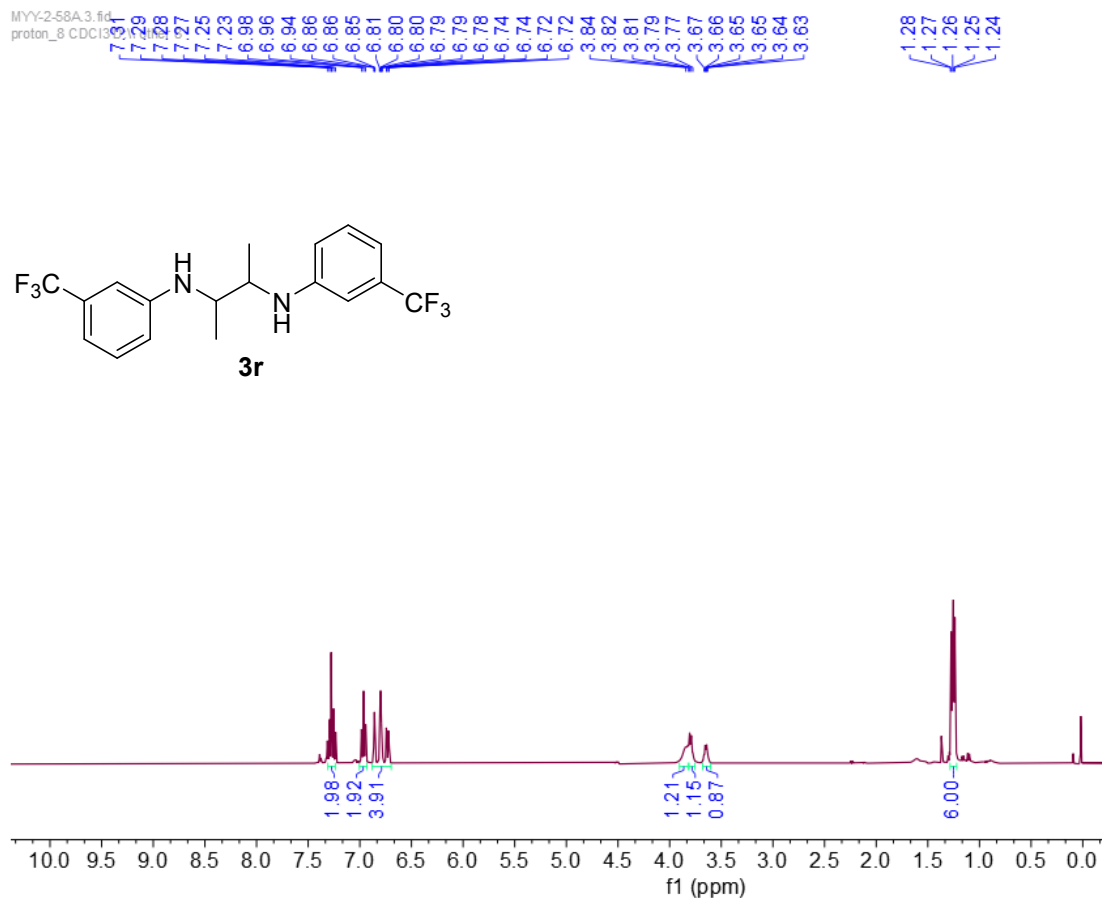



$^{19}\text{F}$ -NMR spectrum of **3r** ( $\text{CDCl}_3$ , 376 MHz)

MYY-2-58A.4.fid  
F19CPD CDC13 D:\other 8

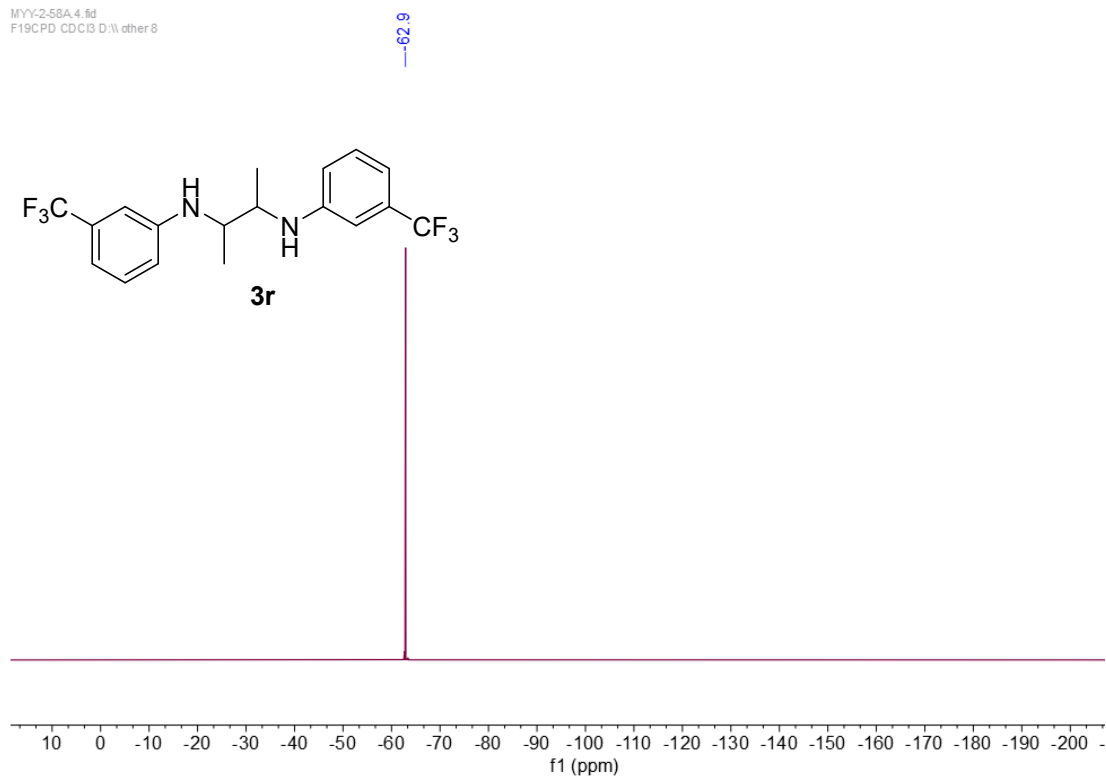

$^{13}\text{C}$ -NMR spectrum of **3r** ( $\text{CDCl}_3$ , 100 MHz)

MYY-2-58A.5.fid  
C13CPD CDC13 D:\other 3

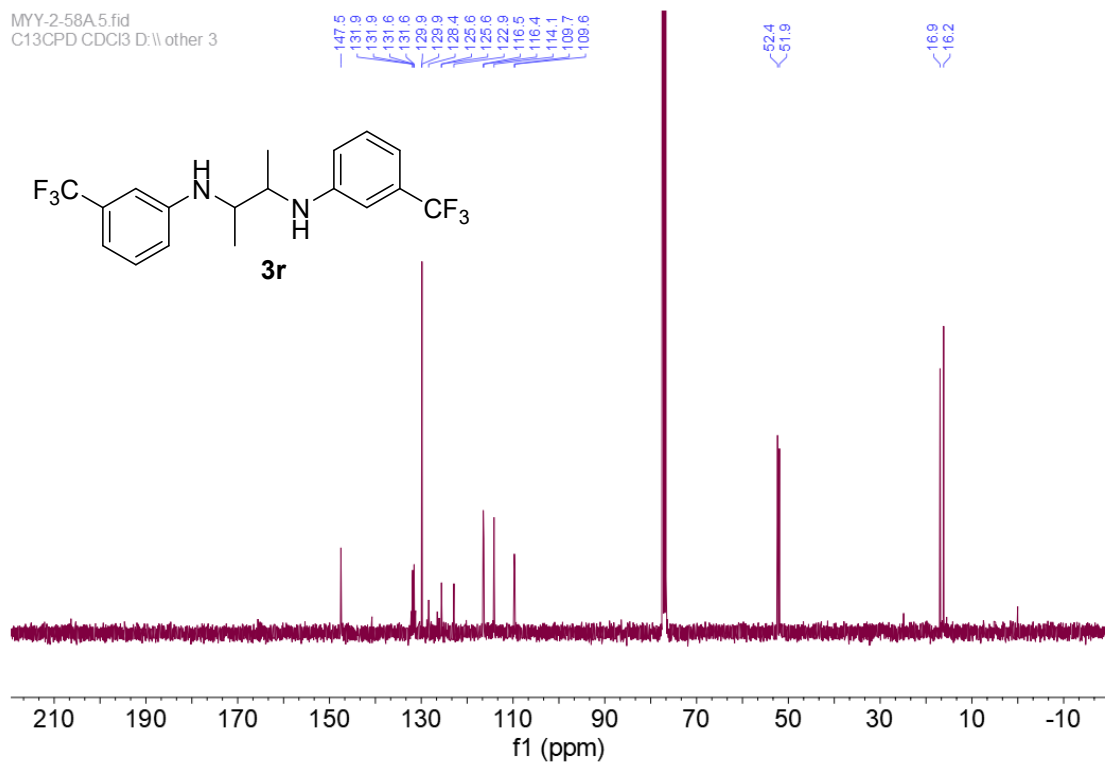

### $^1\text{H-NMR}$ spectrum of **3s** ( $\text{CDCl}_3$ , 400 MHz)

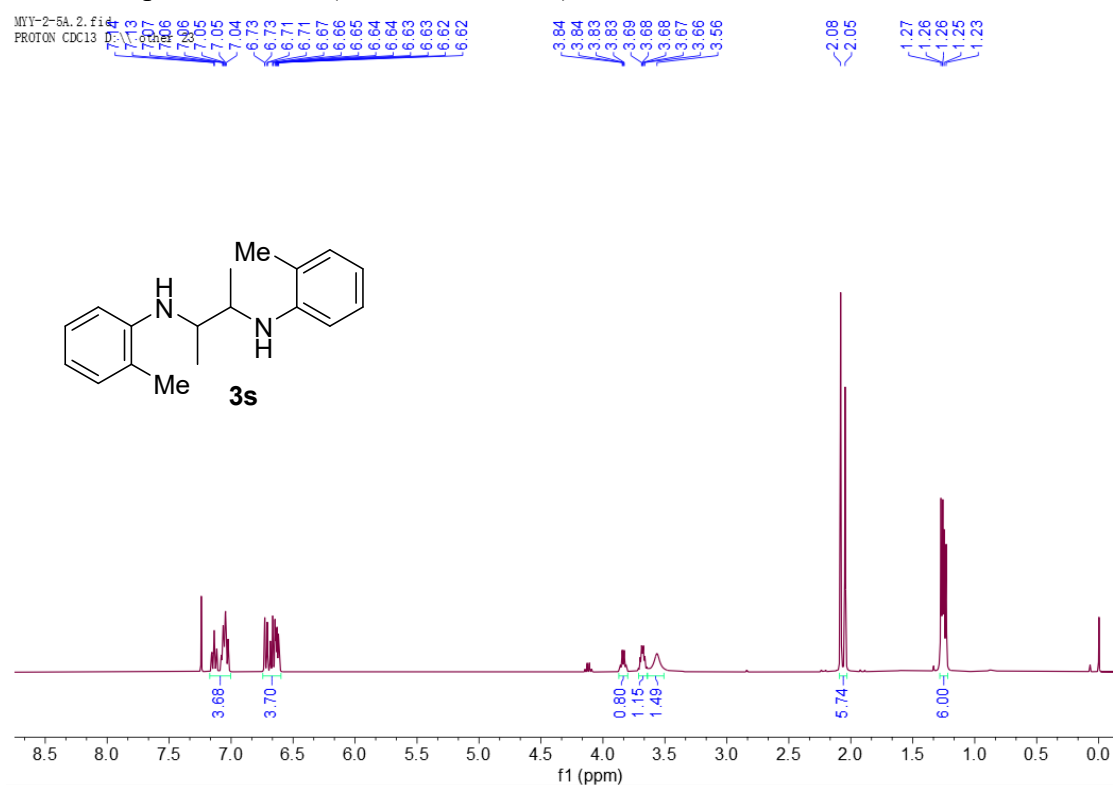

### $^{13}\text{C-NMR}$ spectrum of **3s** ( $\text{CDCl}_3$ , 100 MHz)

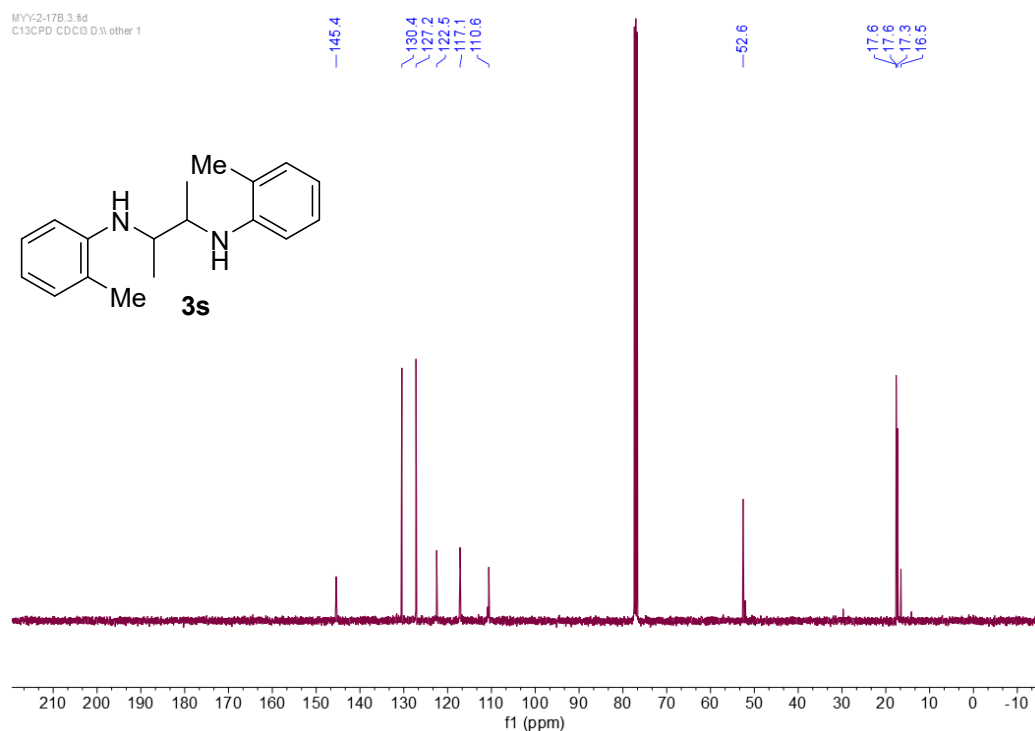

$^1\text{H-NMR}$  spectrum of **3t** ( $\text{CDCl}_3$ , 400 MHz)

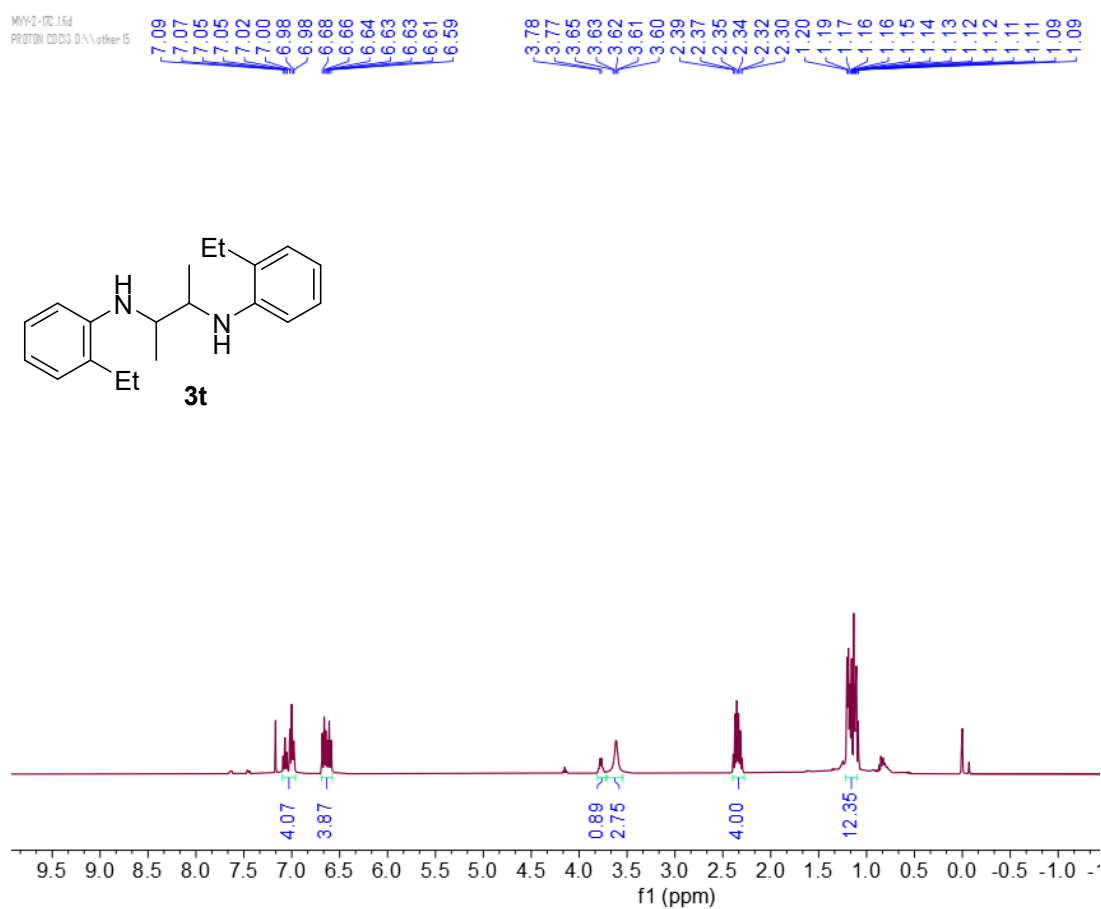

$^{13}\text{C-NMR}$  spectrum of **3t** ( $\text{CDCl}_3$ , 100 MHz)

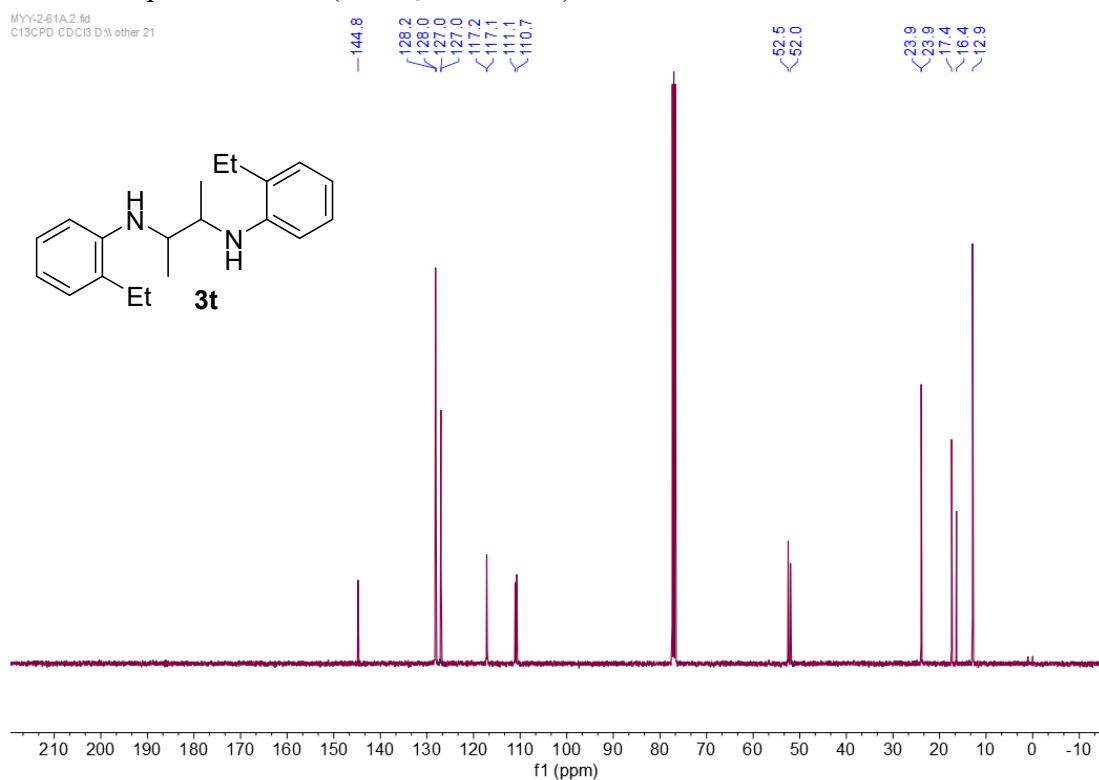

$^1\text{H-NMR}$  spectrum of **3u** ( $\text{CDCl}_3$ , 400 MHz)

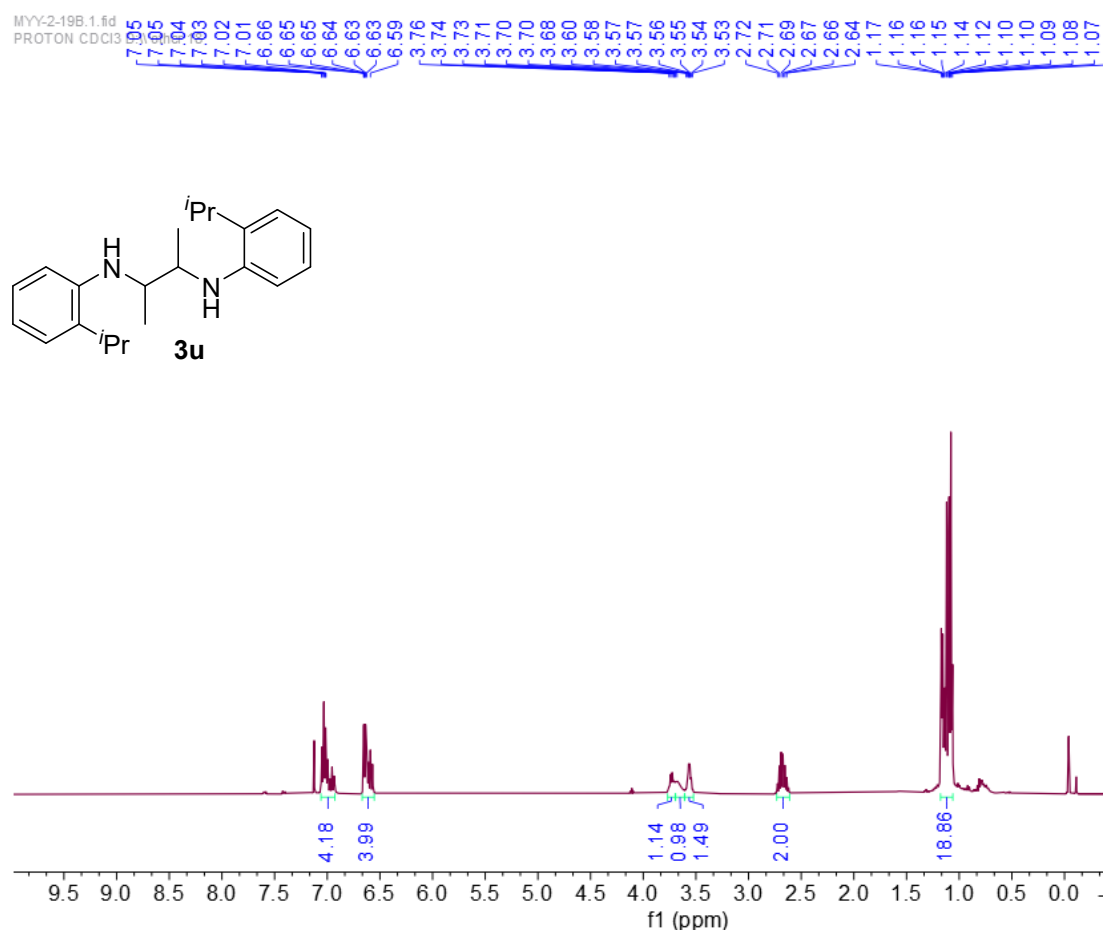

$^{13}\text{C-NMR}$  spectrum of **3u** ( $\text{CDCl}_3$ , 100 MHz)

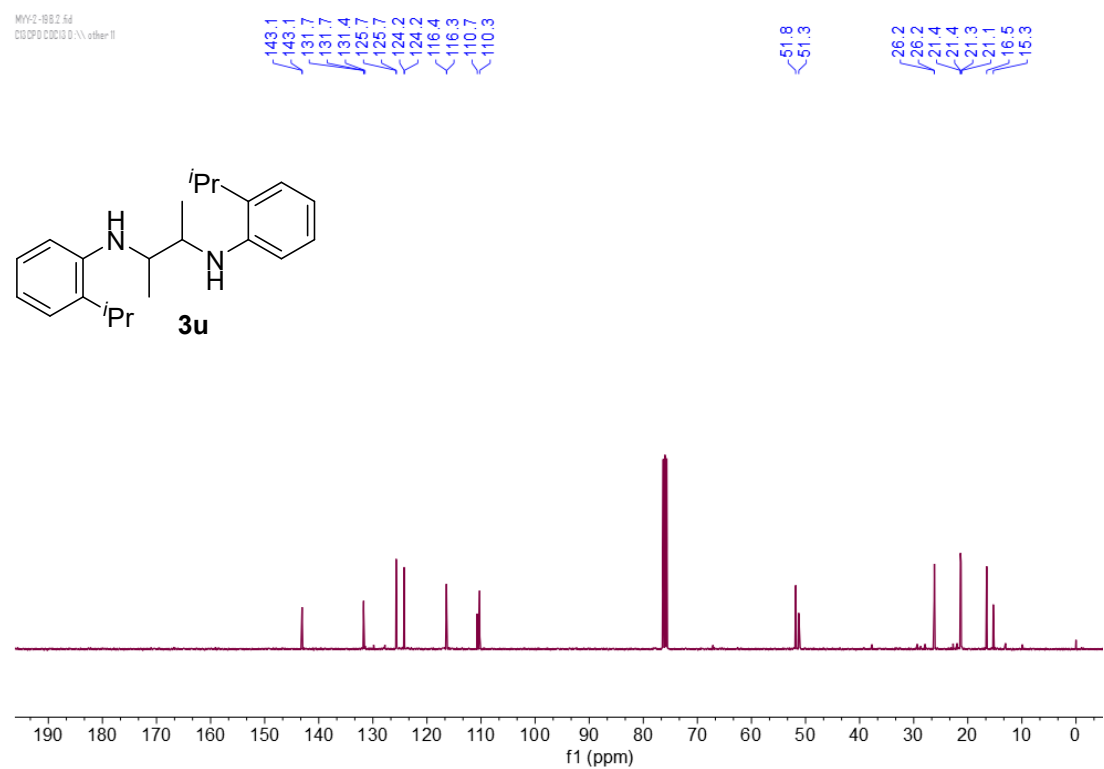

### <sup>1</sup>H-NMR spectrum of **3v** (CDCl<sub>3</sub>, 400 MHz)

MYY-3-8E.1.fid  
proton\_8 CDCl3 D:\

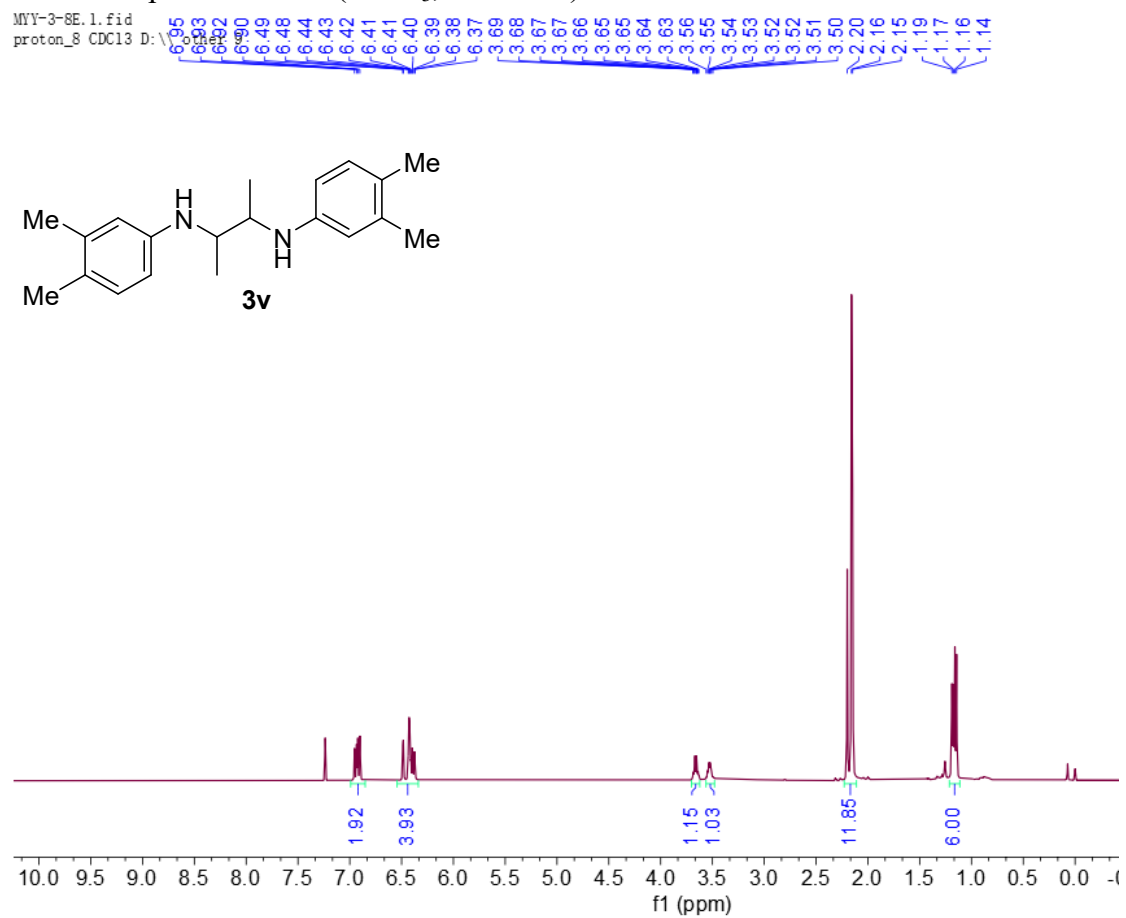

### <sup>13</sup>C-NMR spectrum of **3v** (CDCl<sub>3</sub>, 100 MHz)

MYY-2-48B.2.fid  
C13CPD CDCl3 D:\other 15

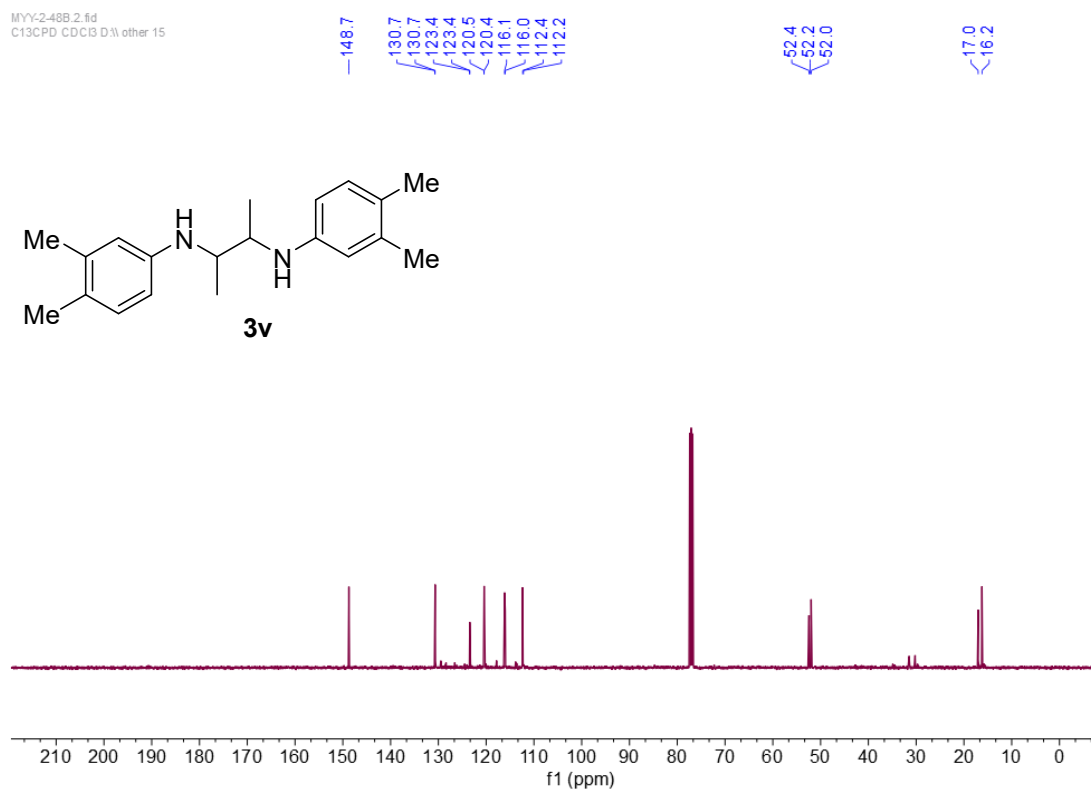

<sup>1</sup>H-NMR spectrum of **3w** (CDCl<sub>3</sub>, 400 MHz)

MYY-2-19B1.1.fid  
PROTON CDCl3 D:\other 1

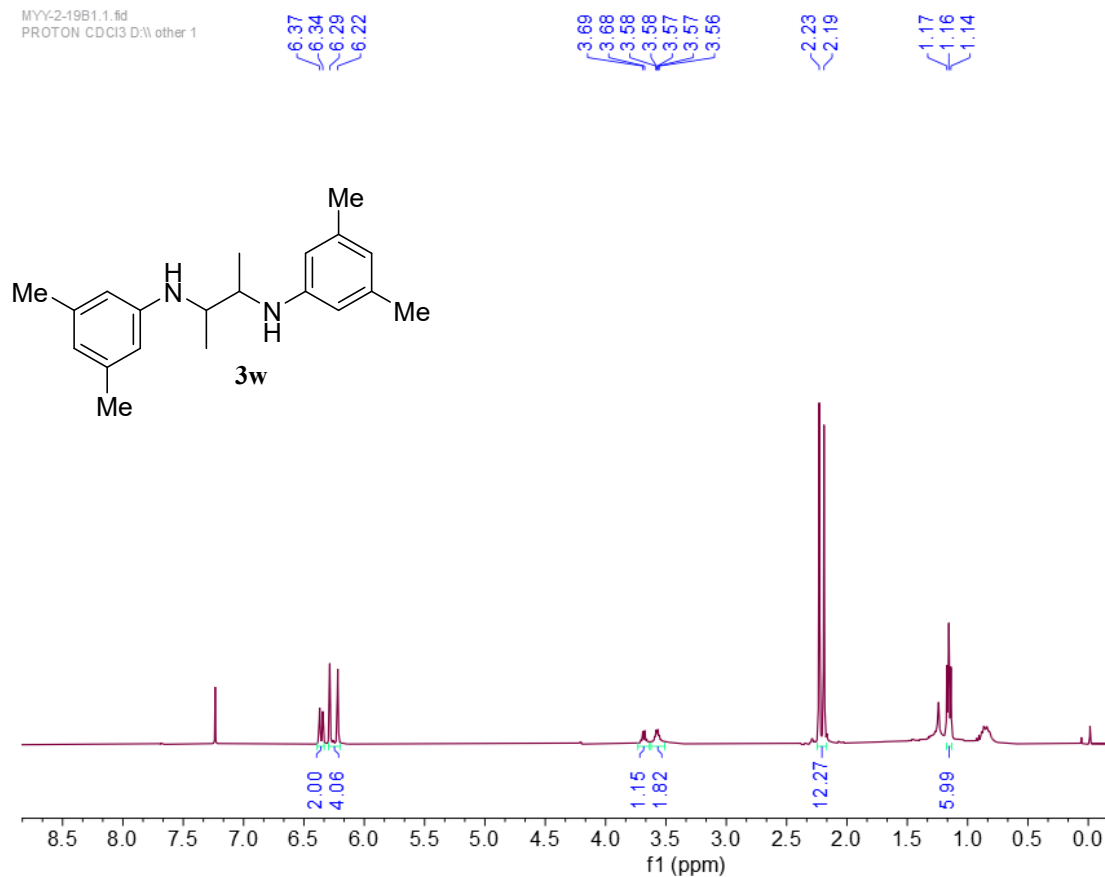

<sup>13</sup>C-NMR spectrum of **3w** (CDCl<sub>3</sub>, 100 MHz)

MW2-18B14.fid  
CDCl3 CDCl3 D:\other 20

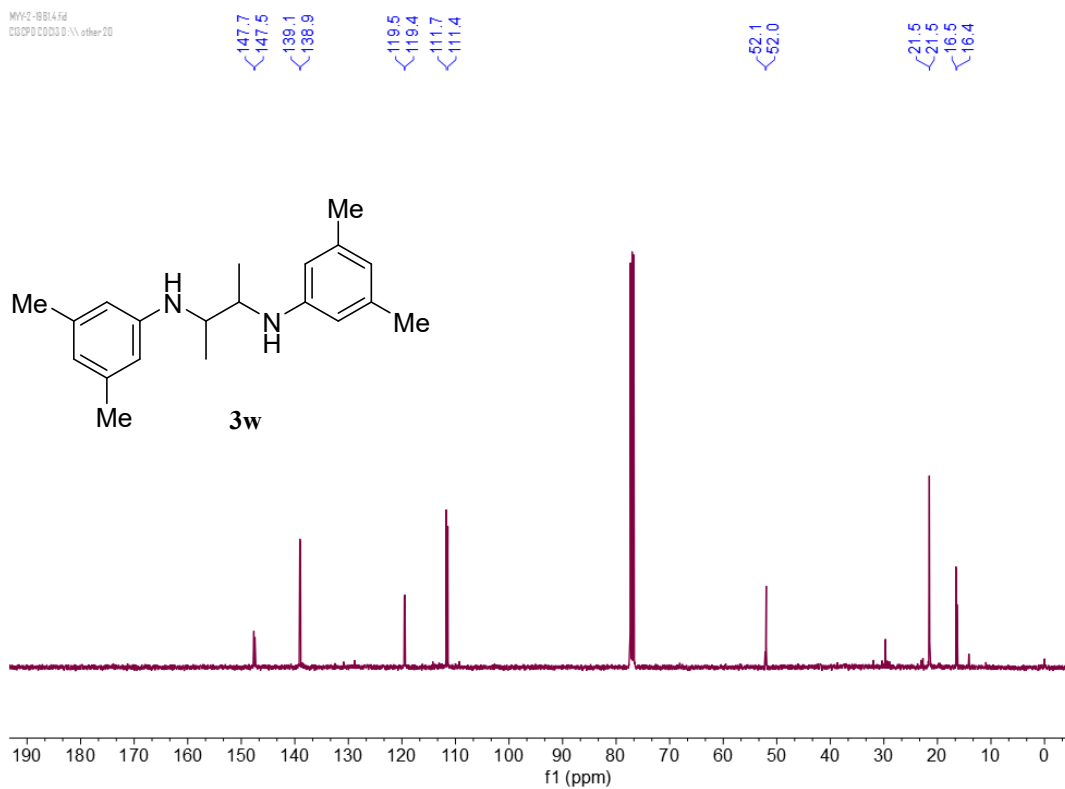

<sup>1</sup>H-NMR spectrum of **3x** (CDCl<sub>3</sub>, 400 MHz)

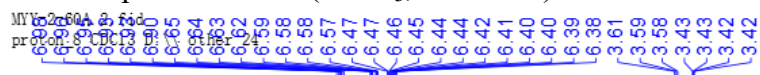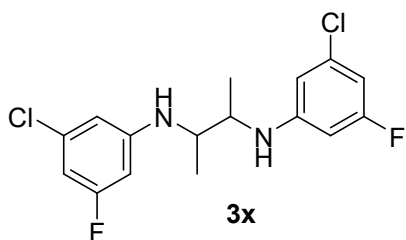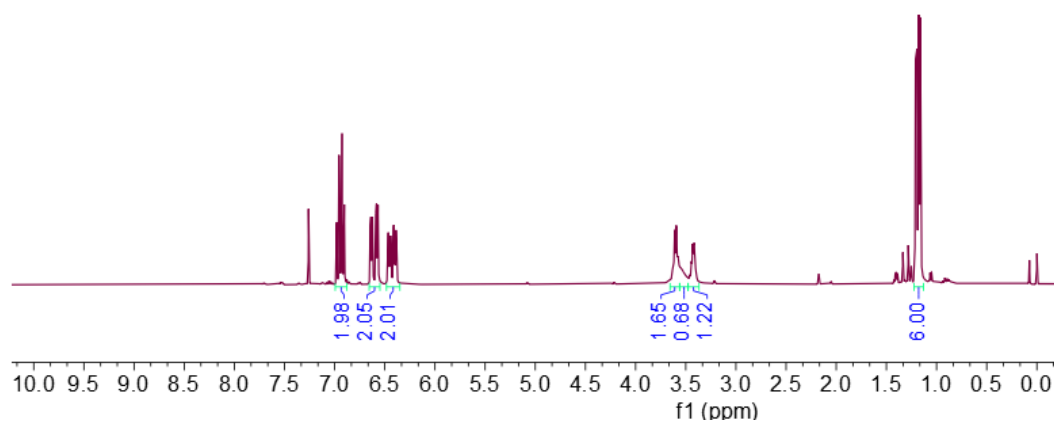

<sup>19</sup>F-NMR spectrum of **3x** (CDCl<sub>3</sub>, 376 MHz)

MY-2-60A-3.fid  
F19CPD CDCl3.D:\other 24

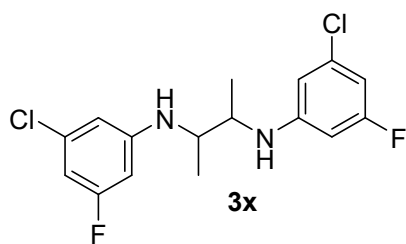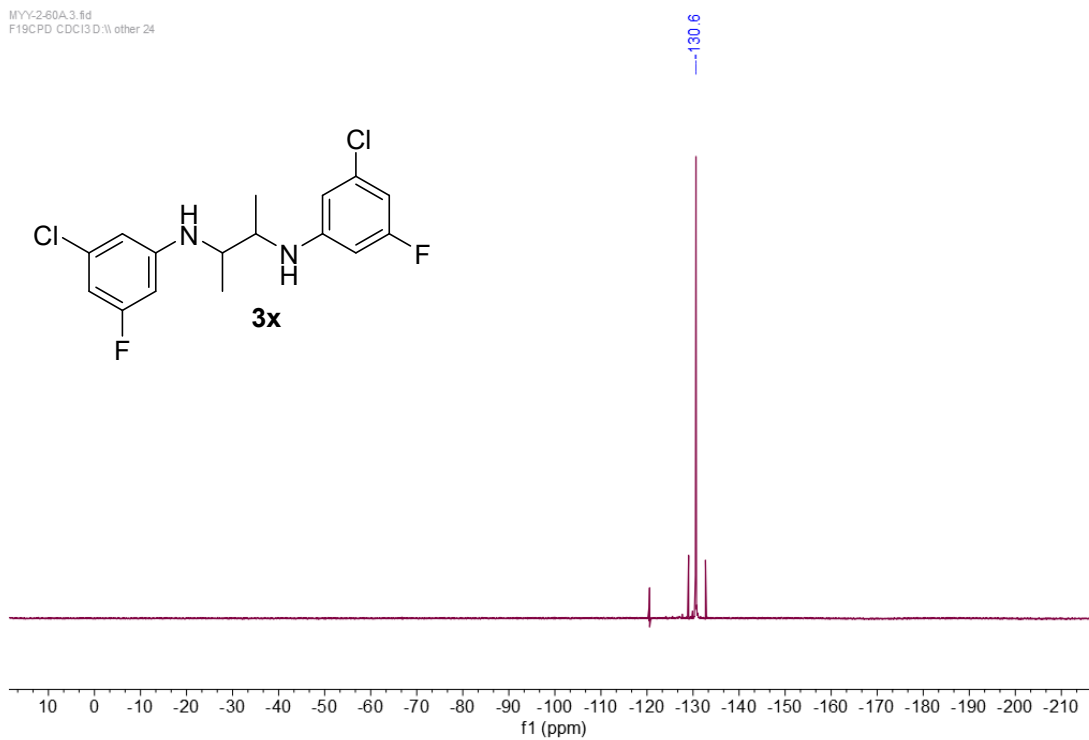

### $^{13}\text{C}$ -NMR spectrum of **3x** ( $\text{CDCl}_3$ , 100 MHz)

MYY-2-60A-4.fid  
C13CPD CDCl3 D:\other 24

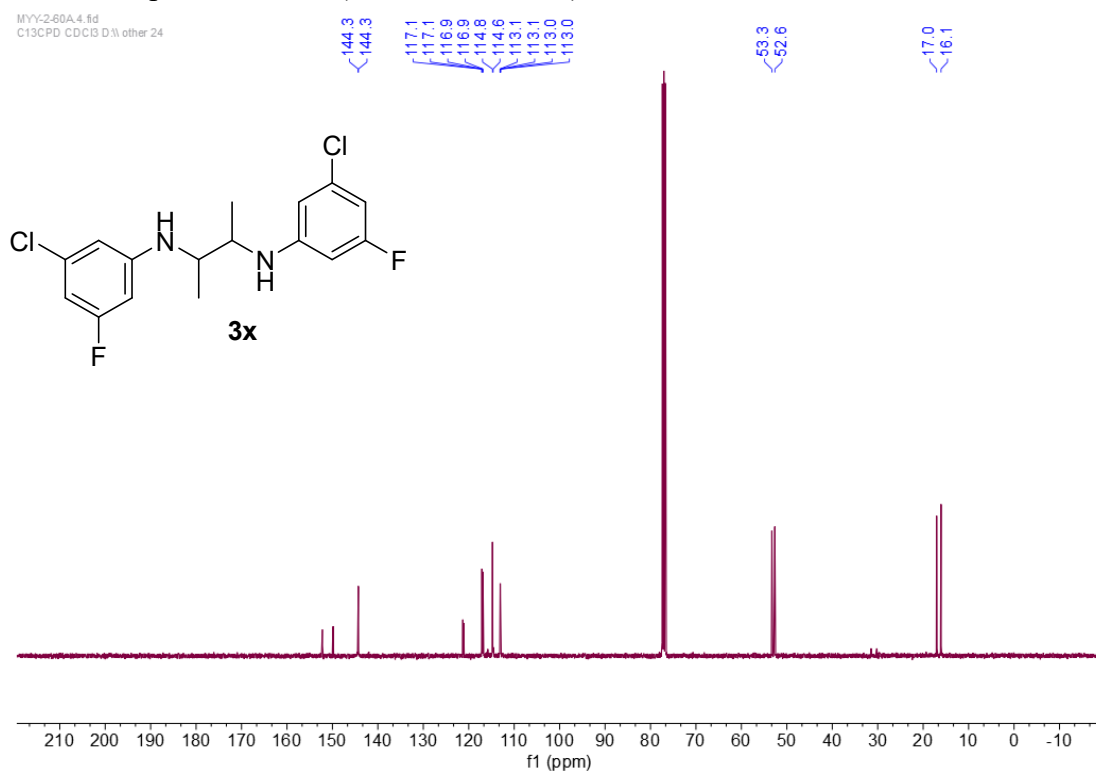

### $^1\text{H}$ -NMR spectrum of **3y** ( $\text{CDCl}_3$ , 400 MHz)

MYY-2-42B-1.fid  
probin\_8 CDCl3 D:\other 6

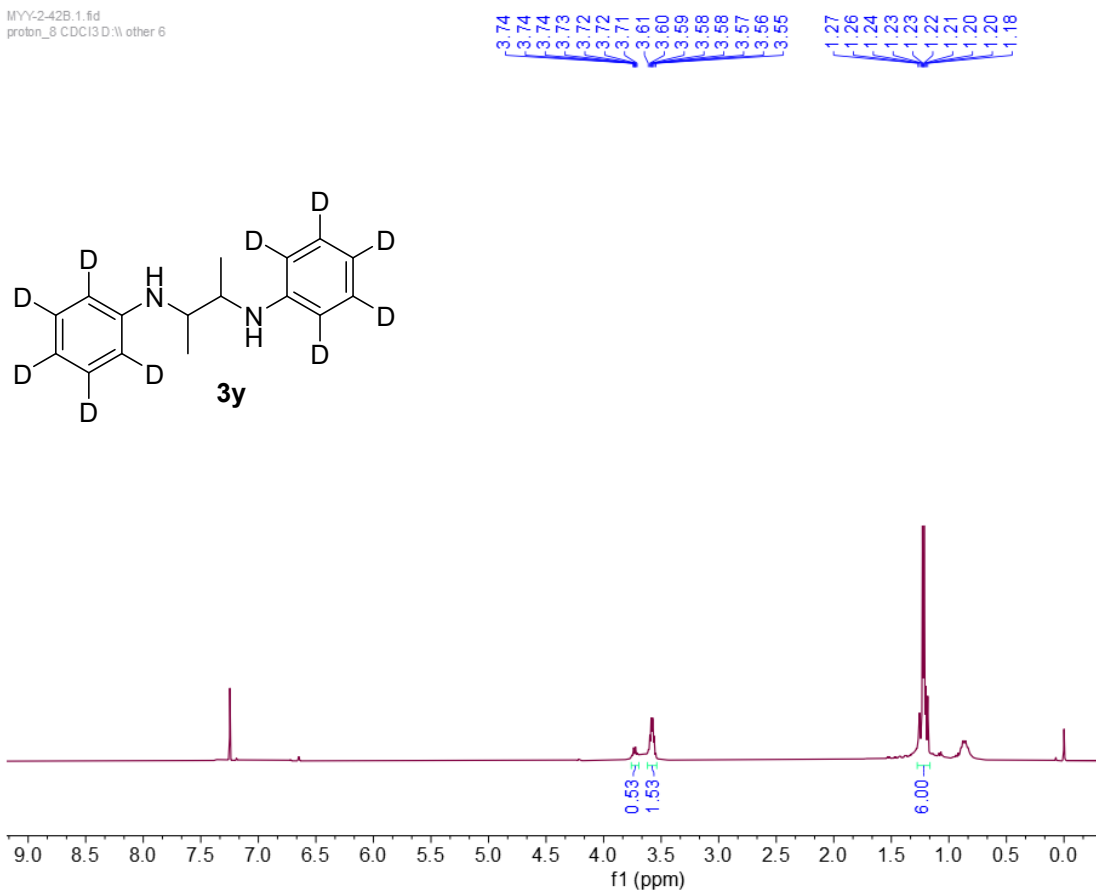



<sup>13</sup>C-NMR spectrum of **3y** (CDCl<sub>3</sub>, 100 MHz)

MYY-3-37B.11.fid  
MYY-3-37B

147.6  
147.5  
129.2  
129.0  
128.9  
128.8  
117.4  
117.1  
116.9  
113.7  
113.4  
113.2  
113.0  
52.6  
52.3  
17.1  
16.3

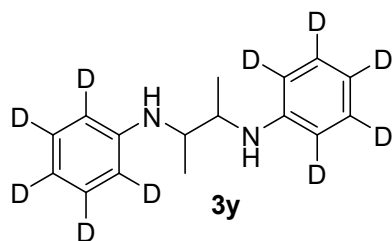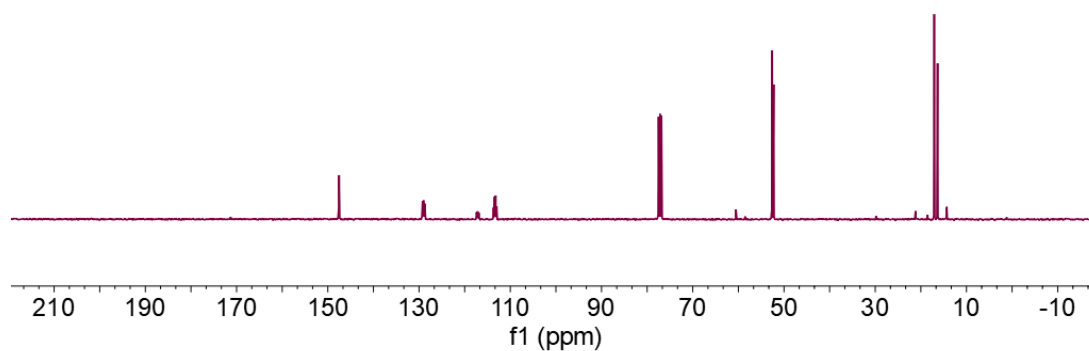

<sup>1</sup>H-NMR spectrum of **3z** (CDCl<sub>3</sub>, 400 MHz)

MYY-2-45A.1.fid  
proton\_8 CDCl3 D:\w other 22

7.05  
7.03  
7.03  
7.02  
7.00  
6.59  
6.58  
6.53  
6.53  
6.47  
6.45  
6.45  
6.44  
6.44  
6.42  
6.42  
3.69  
3.69  
3.68  
3.68  
3.67  
3.67  
3.54  
3.54  
3.53  
3.53  
3.53  
2.84  
2.83  
2.82  
2.81  
2.80  
2.79  
2.78  
2.06  
2.05  
2.04  
2.03  
2.03  
2.01  
1.21  
1.19  
1.18  
1.16

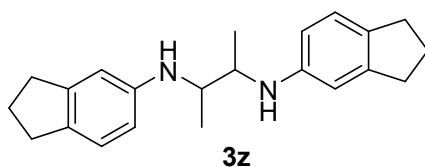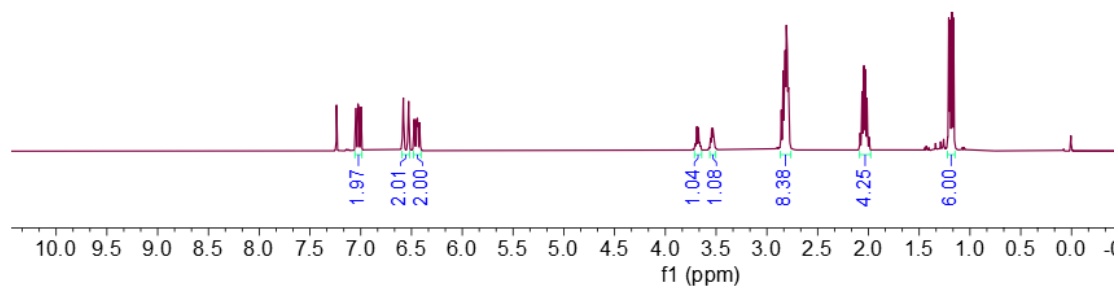

<sup>13</sup>C-NMR spectrum of **3z** (CDCl<sub>3</sub>, 100 MHz)

MYY-2-45A.2.fid  
C13CPD CDCl3 D:\other 3

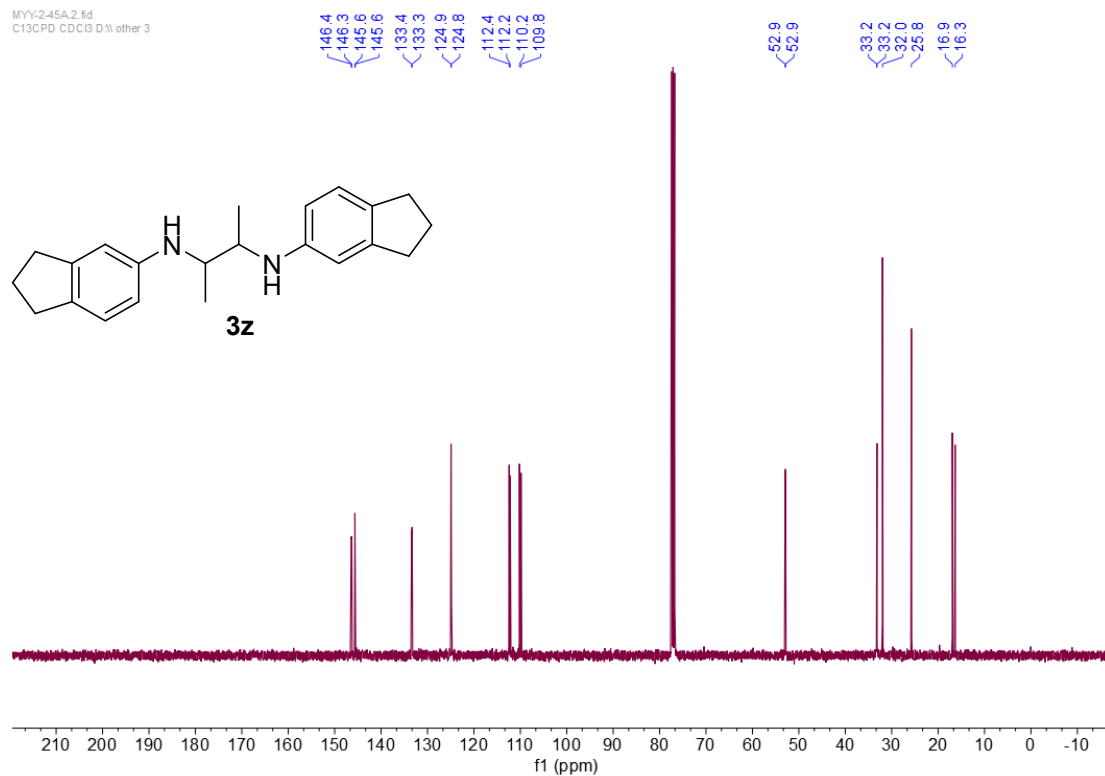

<sup>1</sup>H-NMR spectrum of **6** (CDCl<sub>3</sub>, 400 MHz)

MYY-2-52B.1.fid  
proton\_8 CDCl3 D:\other 2

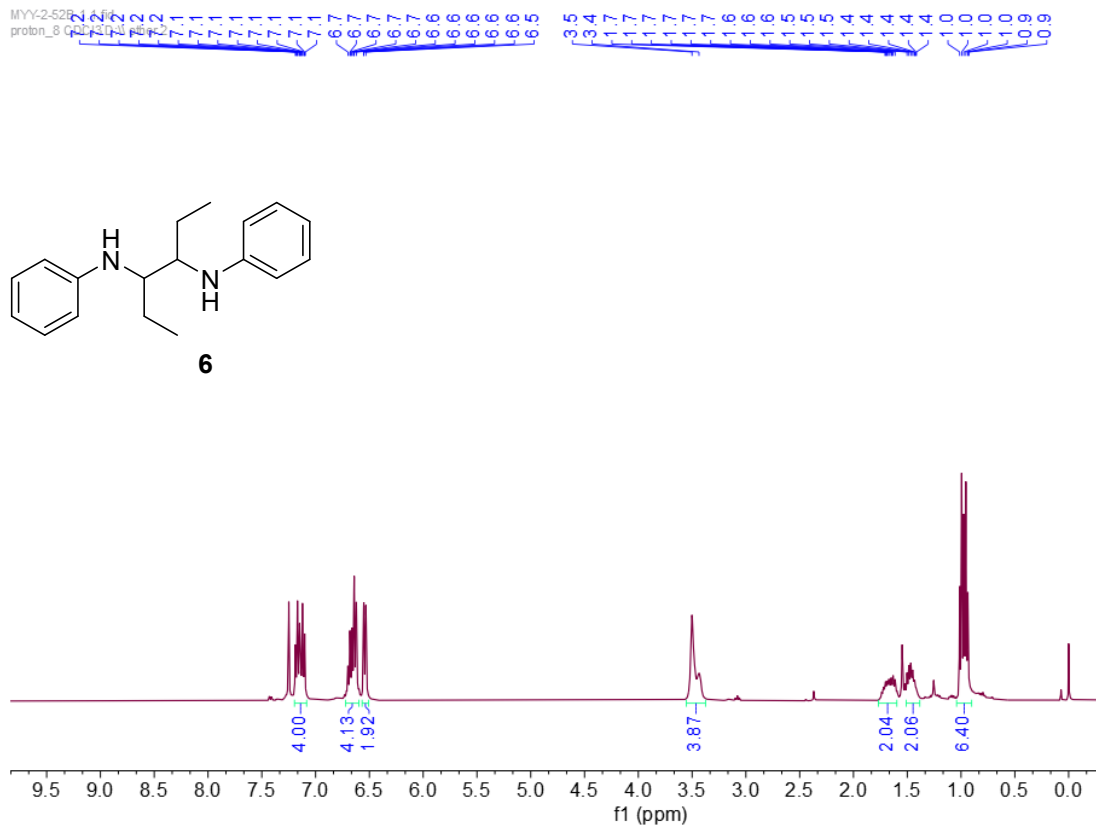

<sup>13</sup>C-NMR spectrum of **6** (CDCl<sub>3</sub>, 100 MHz)

MY2-52B164  
CDCl<sub>3</sub> CDCl<sub>3</sub>D:\other\B

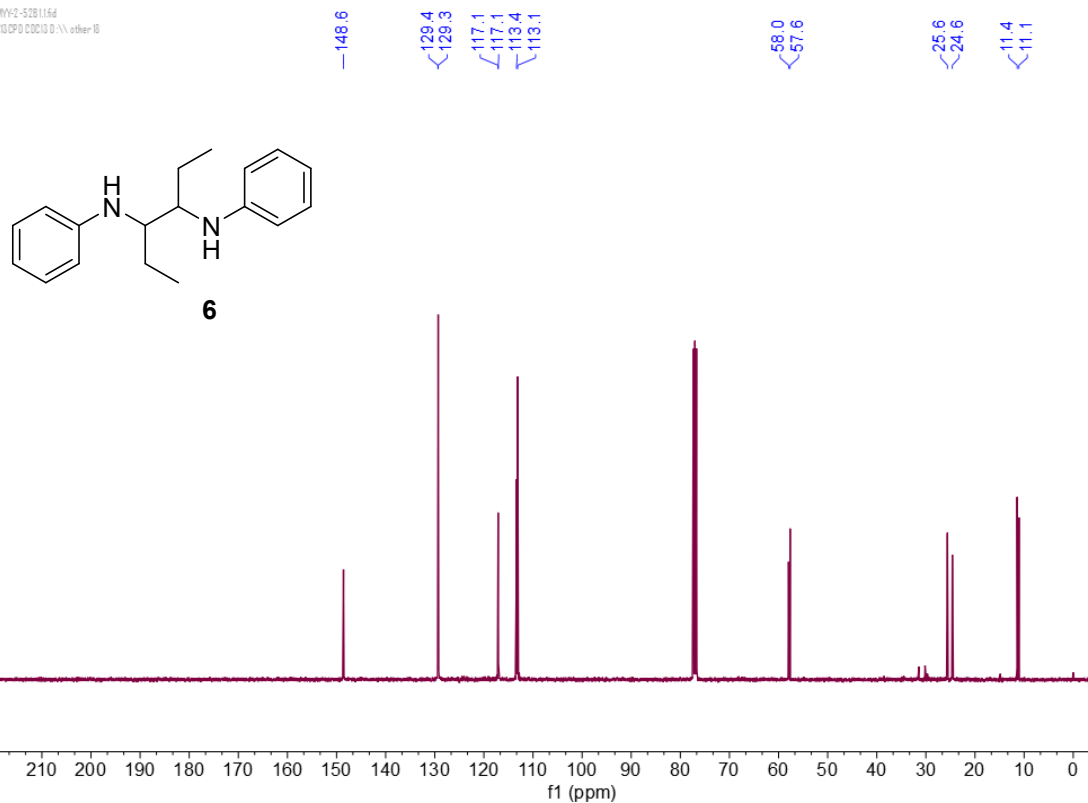

<sup>1</sup>H-NMR spectrum of **7** (CDCl<sub>3</sub>, 400 MHz)

MY2-52B-2.1.fid  
proton\_8 CDCl<sub>3</sub>D:\other\3

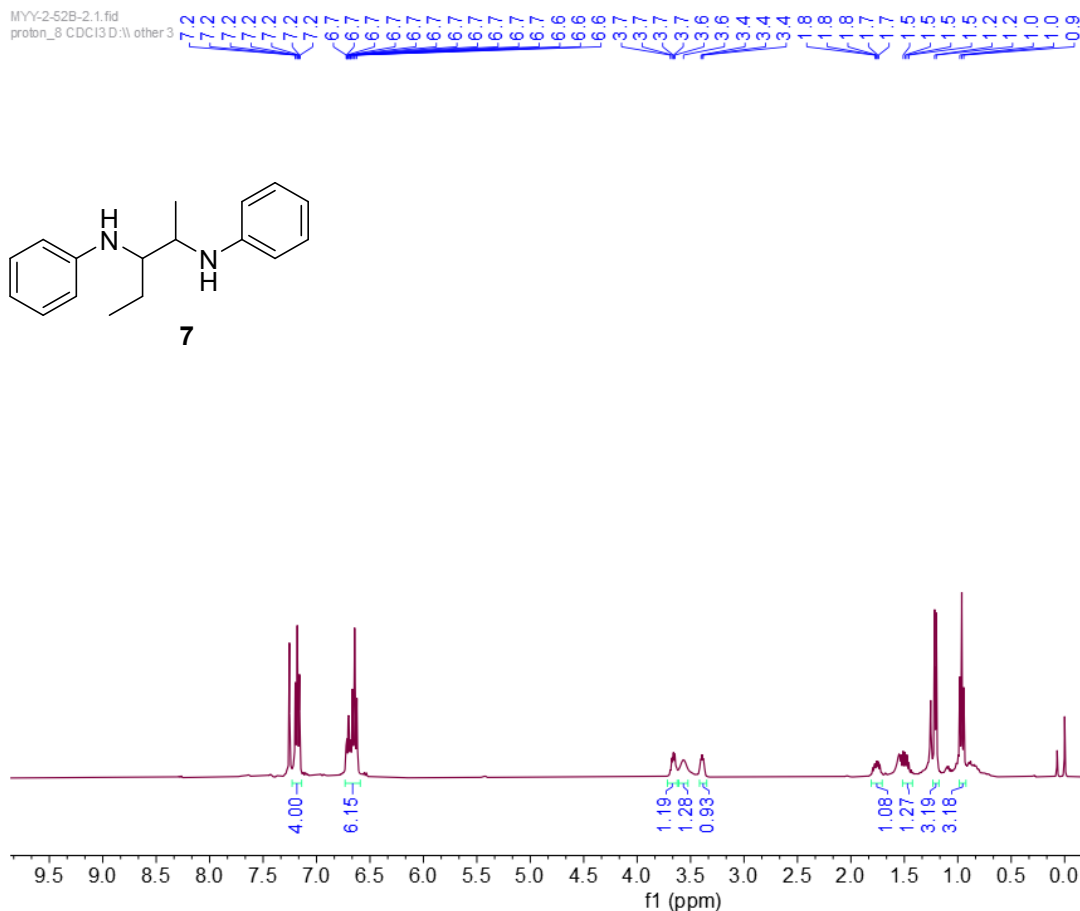

<sup>13</sup>C-NMR spectrum of **7** (CDCl<sub>3</sub>, 100 MHz)

MW2-53212.64  
CDCl<sub>3</sub> CDCl<sub>3</sub> ether21

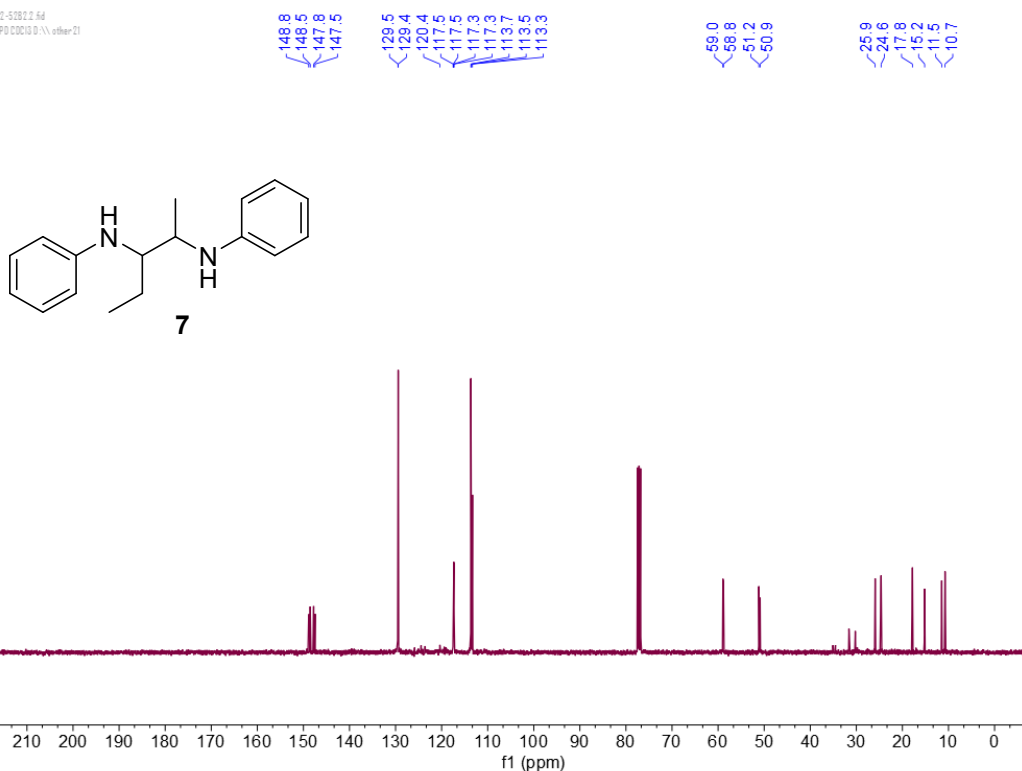

<sup>1</sup>H-NMR spectrum of **8** (CDCl<sub>3</sub>, 400 MHz)

MYY-2-78C-14.64  
proton\_8 CDCl<sub>3</sub> ether21

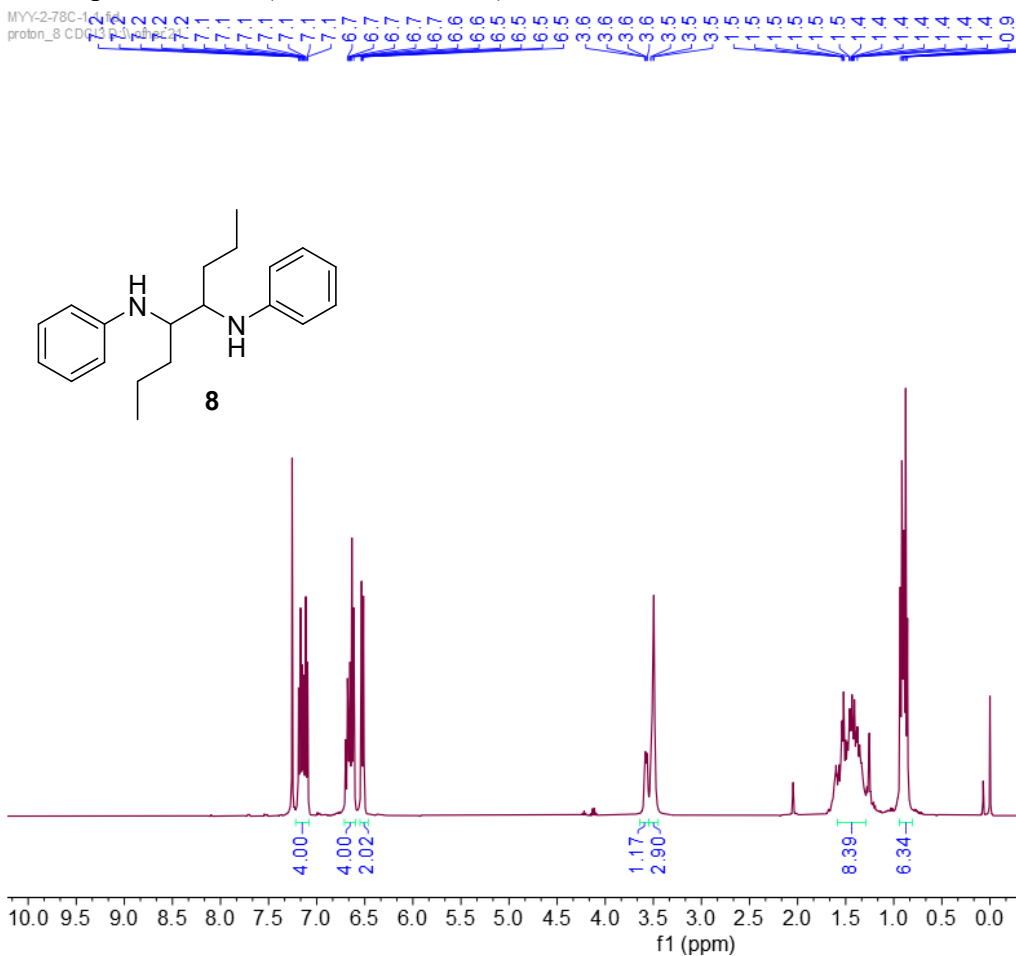

$^{13}\text{C}$ -NMR spectrum of **8** ( $\text{CDCl}_3$ , 100 MHz)

MY-2-78C1.2.fid  
C13CPD CDCl3 D:\other 9

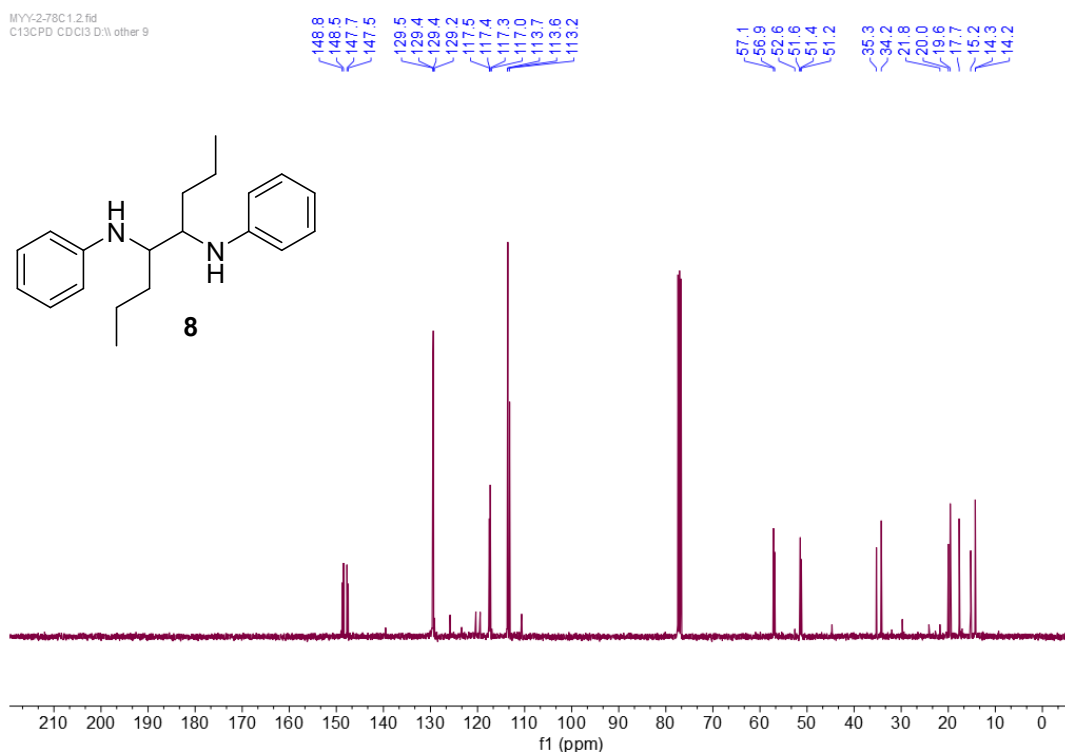

$^1\text{H}$ -NMR spectrum of **9** ( $\text{CDCl}_3$ , 400 MHz)

MY-2-78C2.1.fid  
proton\_8 CDCl3 D:\other 2

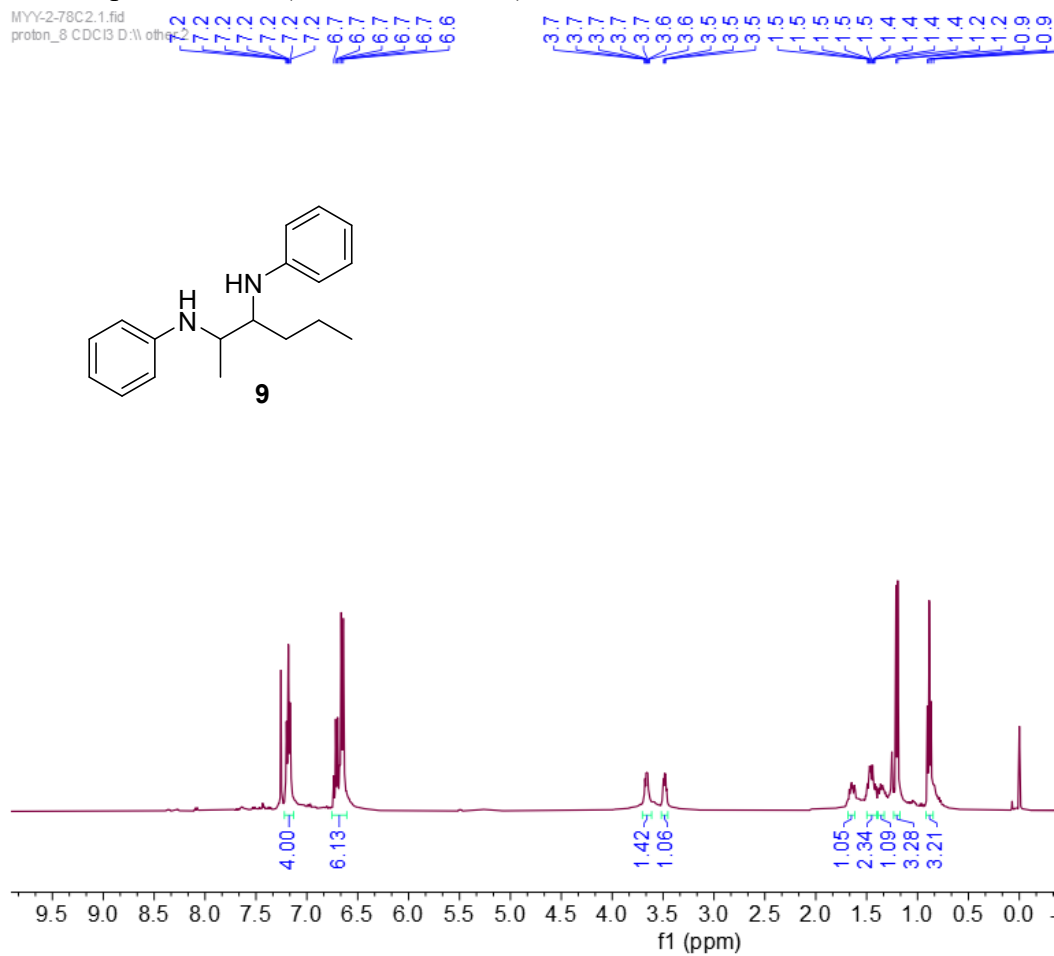



<sup>13</sup>C-NMR spectrum of **10** (CDCl<sub>3</sub>, 100 MHz)

DWJ(-4-7C2).11.fid  
DWJ(-4-7C2)

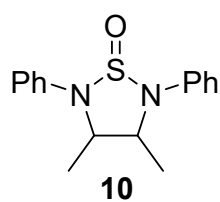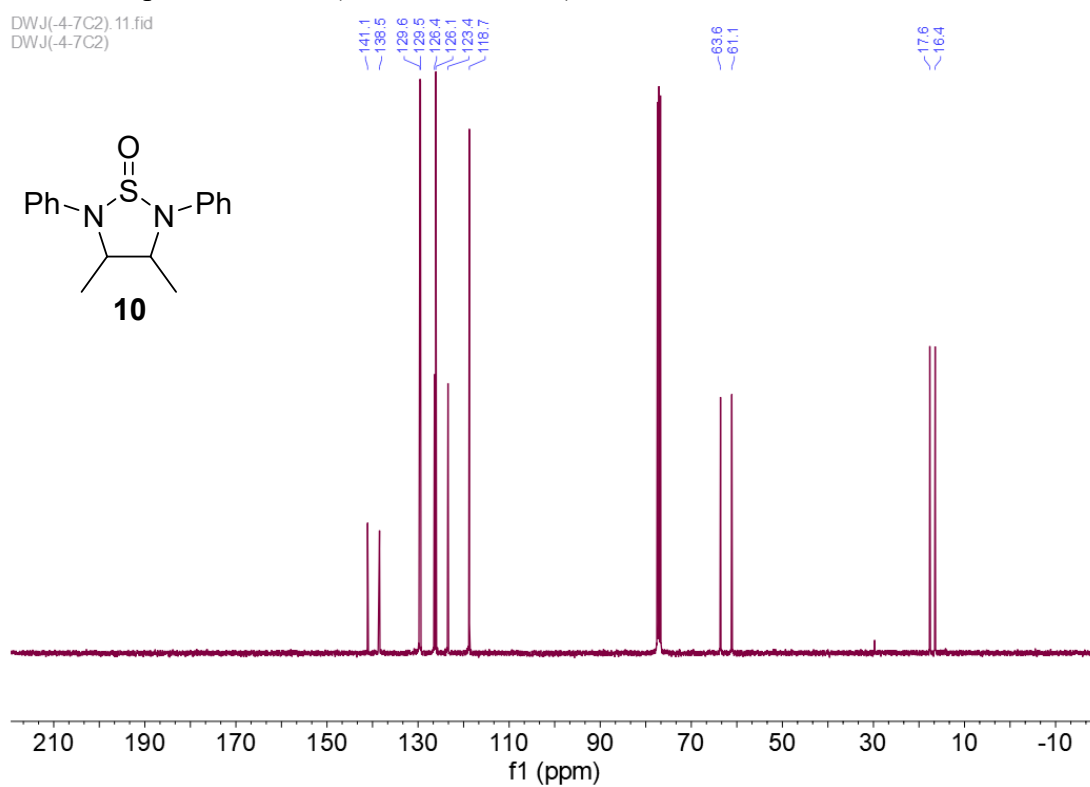

<sup>1</sup>H-NMR spectrum of **11** (CDCl<sub>3</sub>, 400 MHz)

MYY-4-7D.2.fid  
proton\_8 CDCl3.D:\ other 6

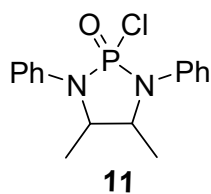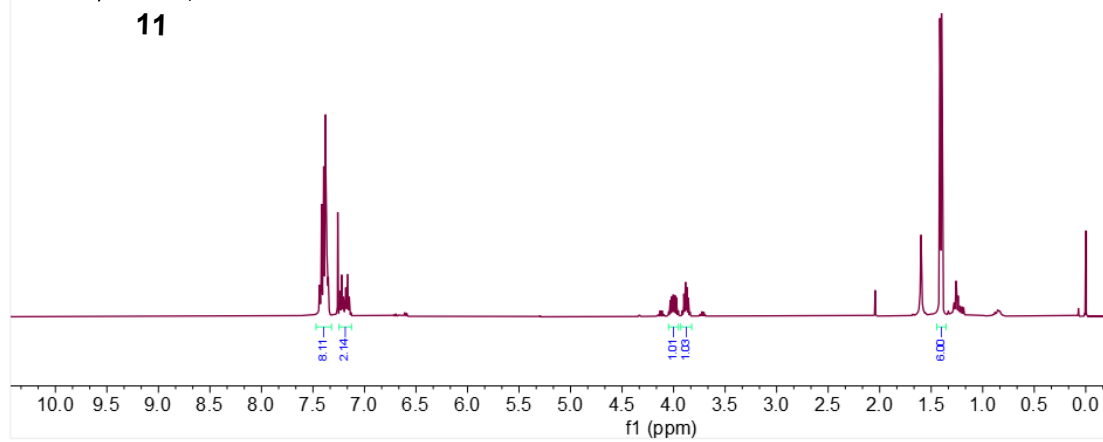

<sup>31</sup>P-NMR spectrum of **11** (CDCl<sub>3</sub>, 162 MHz)

MYY-4-7D.1.fid  
P31CPD CDCl3 D:\ other 16

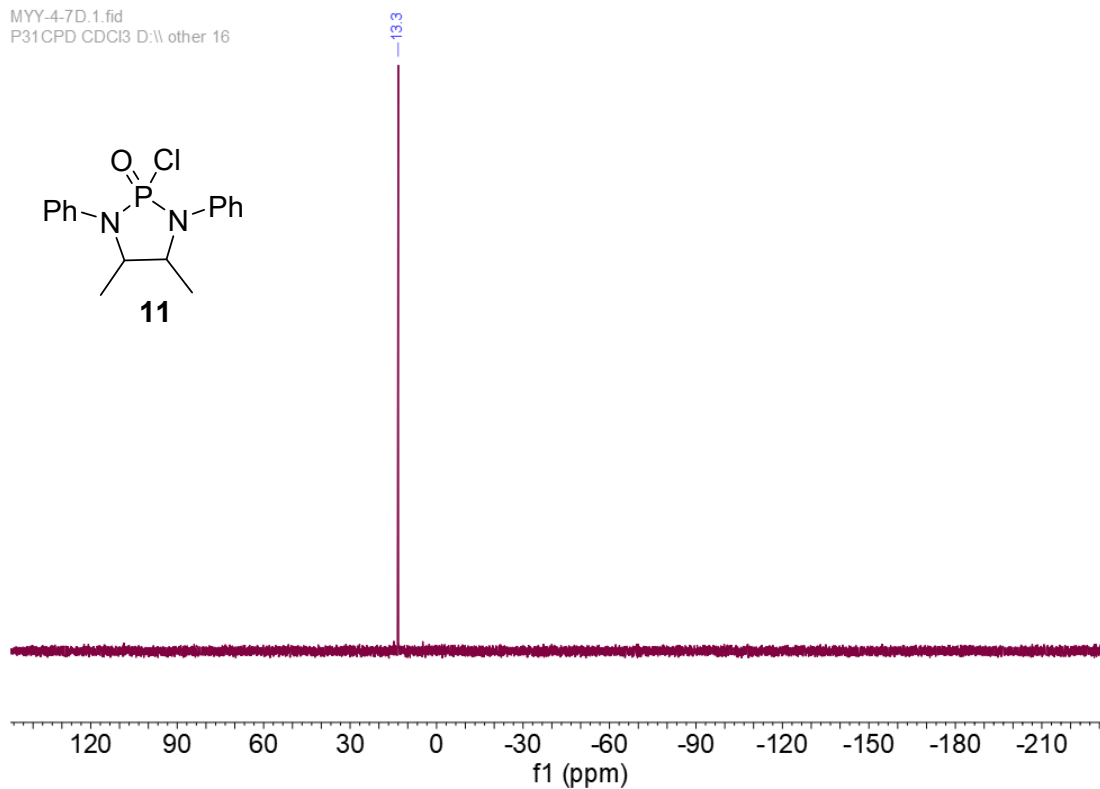

<sup>13</sup>C-NMR spectrum of **11** (CDCl<sub>3</sub>, 100 MHz)

MYY-4-7D.3.fid  
C13CPD CDCl3 D:\ other 12

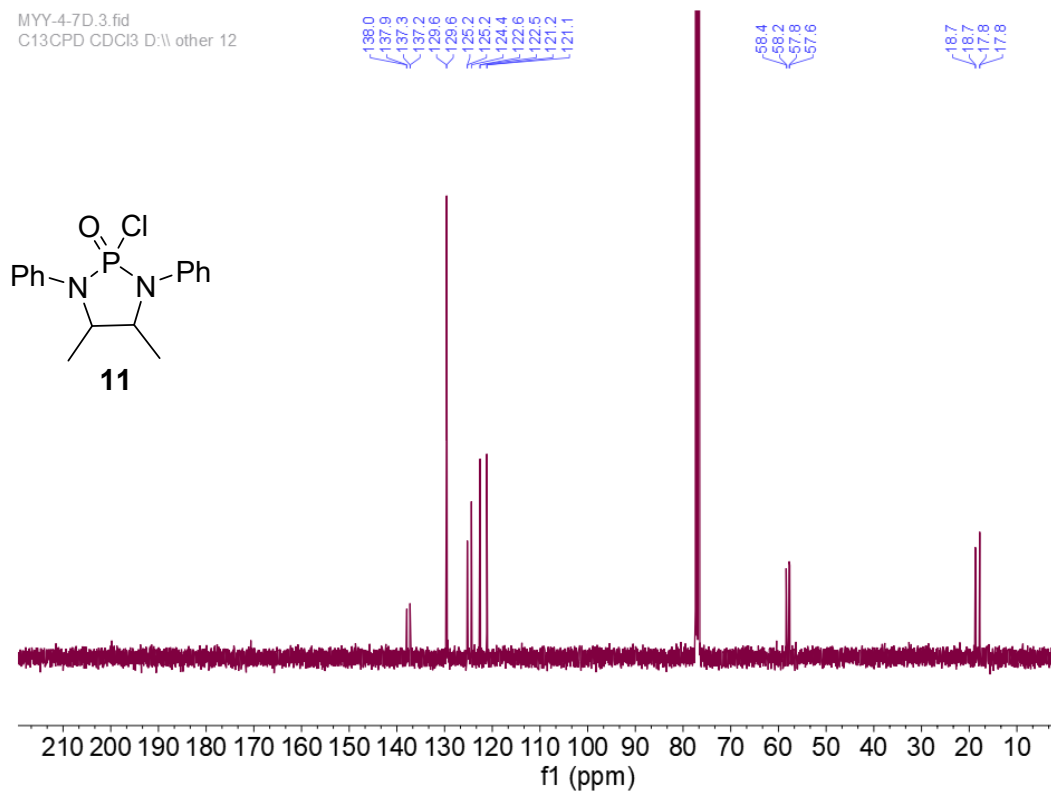

<sup>1</sup>H-NMR spectrum of **5a** (CDCl<sub>3</sub>, 400 MHz)



MYY-3-94.1.fid  
 protn\_8 CDCl3 D:\other 21

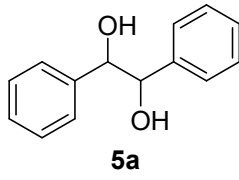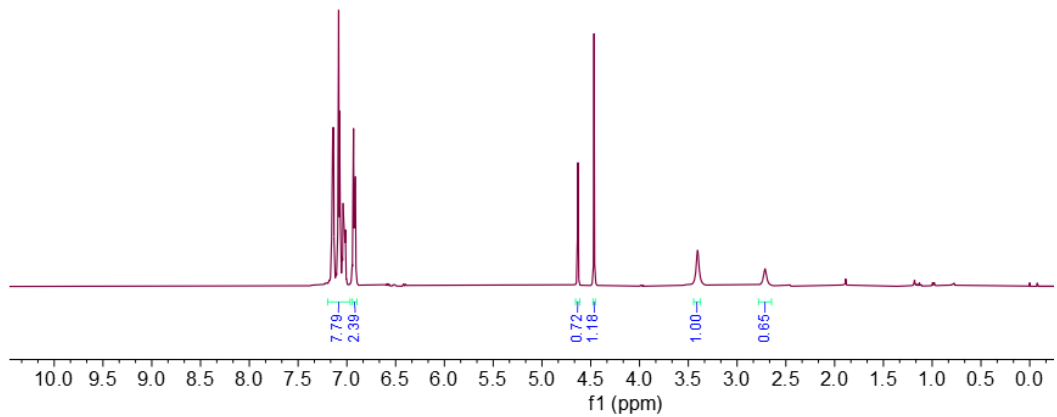

<sup>13</sup>C-NMR spectrum of **5a** (CDCl<sub>3</sub>, 100 MHz)

MYY-3-94.2.fid  
 C13CPD CDCl3 D:\other 21

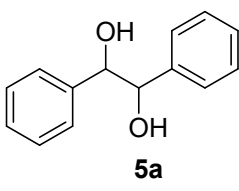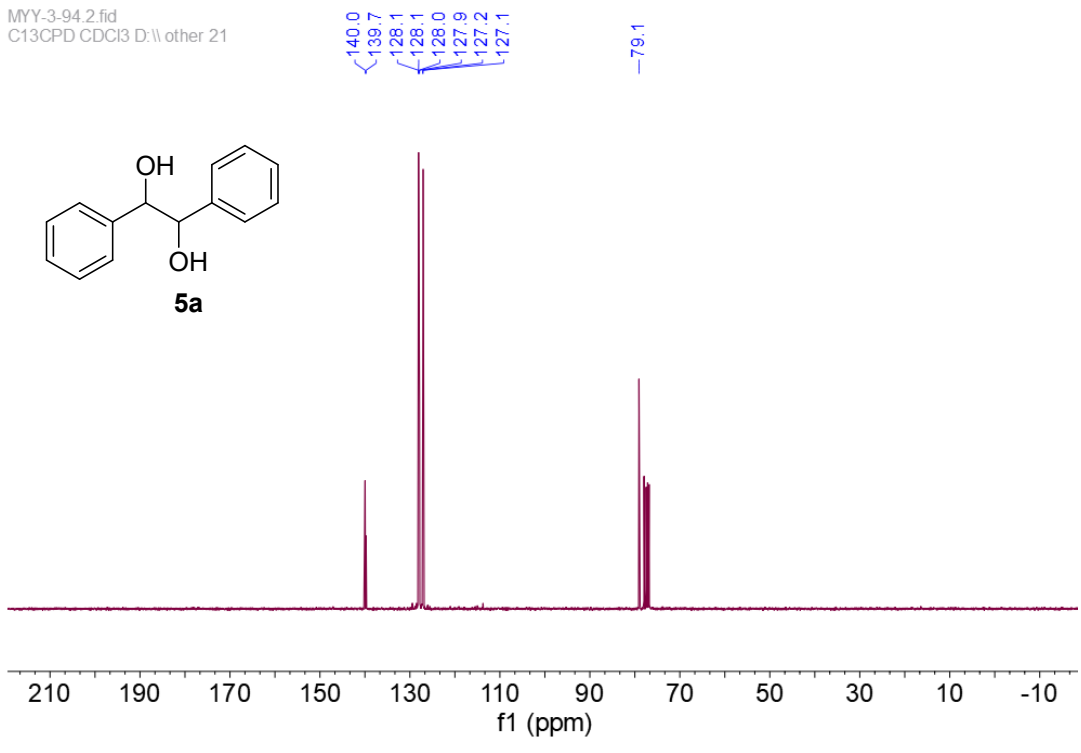

<sup>1</sup>H-NMR spectrum of **5b** (CDCl<sub>3</sub>, 400 MHz)

MYY-3-90A.1.fid  
proton\_8 CDCl3 D:\other 1

7.2  
7.2  
7.2  
7.1  
7.1  
7.1  
7.1  
7.0  
7.0  
7.0  
7.0  
7.0  
7.0  
7.0  
4.7  
4.6  
-2.9  
2.3  
2.3  
2.2

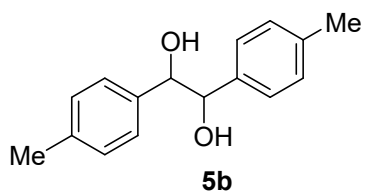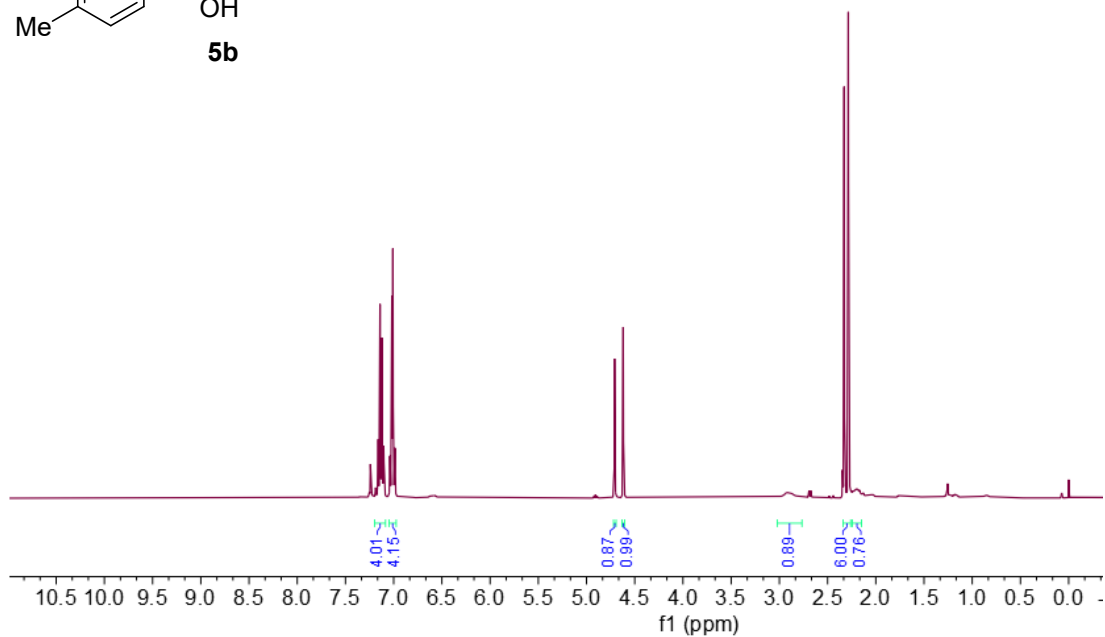

<sup>13</sup>C-NMR spectrum of **5b** (CDCl<sub>3</sub>, 100 MHz)

MYY-3-90A.2.fid  
C13CPD CDCl3 D:\other 22

137.8  
137.5  
137.0  
137.0  
129.0  
128.8  
127.1  
126.9  
78.8  
78.0  
21.2  
21.2

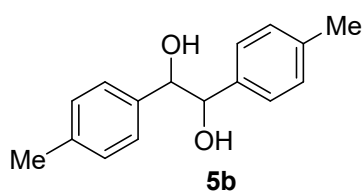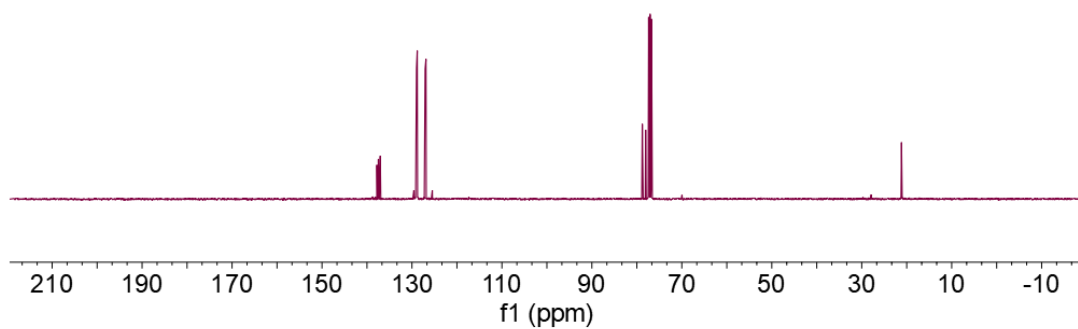

<sup>1</sup>H-NMR spectrum of **5c** (CDCl<sub>3</sub>, 400 MHz)

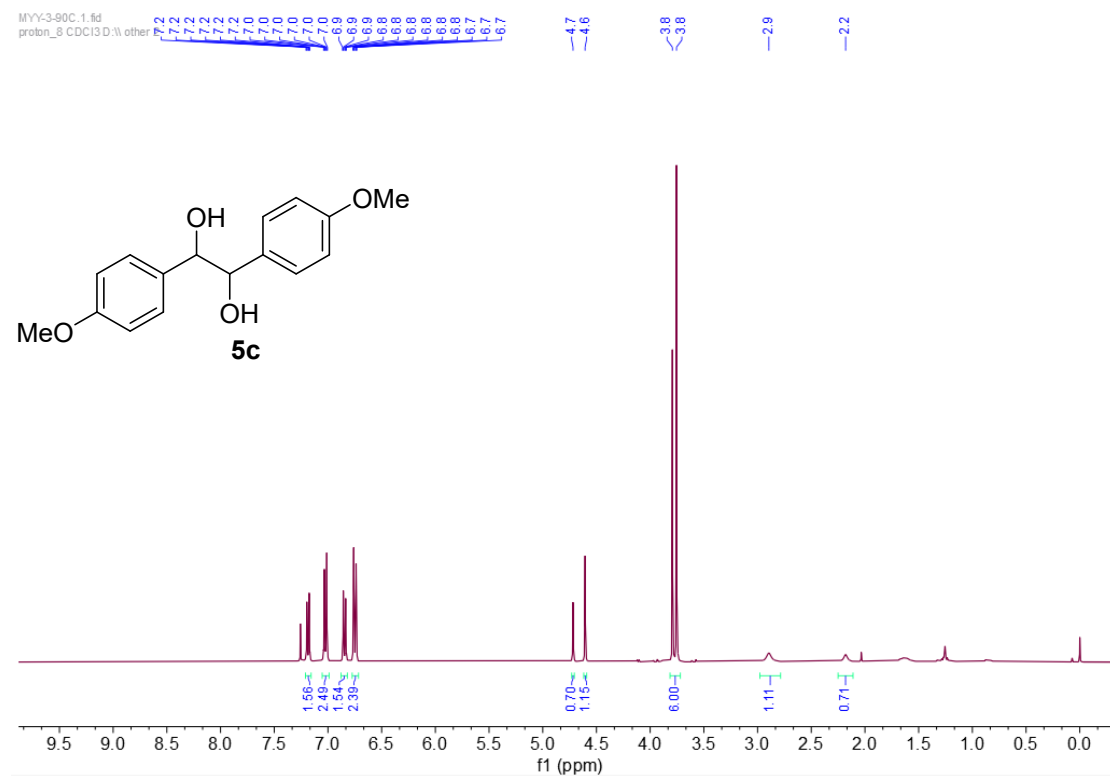

<sup>13</sup>C-NMR spectrum of **5c** (CDCl<sub>3</sub>, 100 MHz)

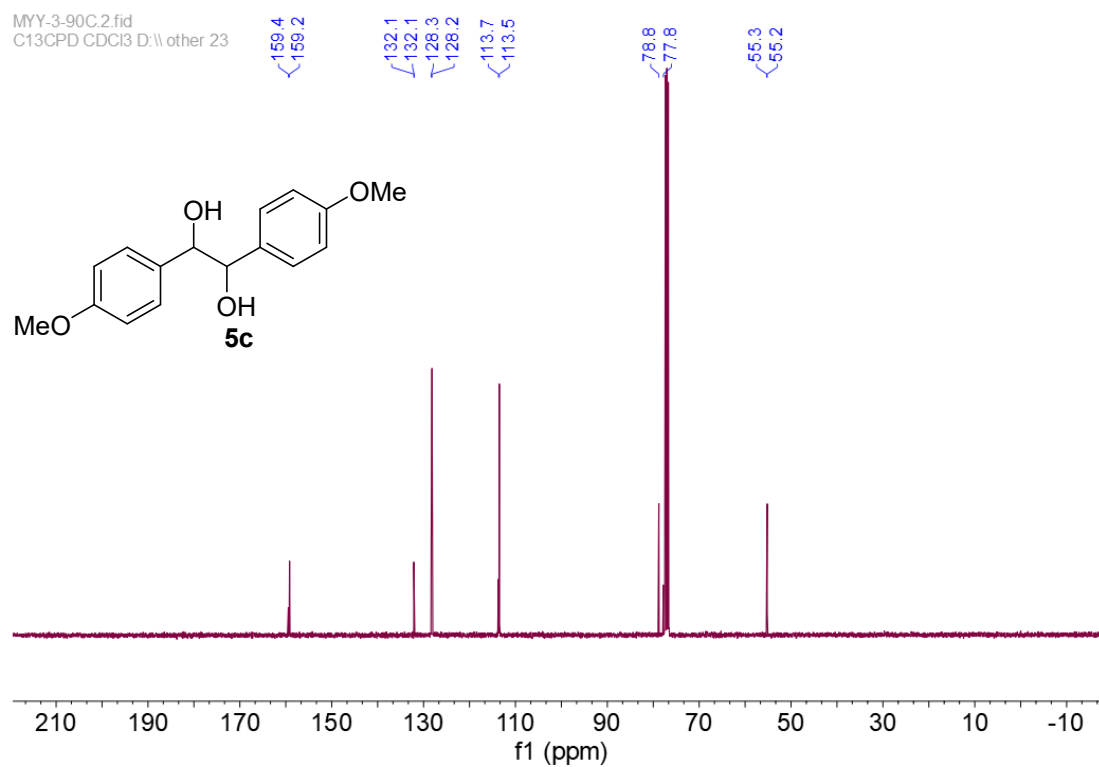

<sup>1</sup>H-NMR spectrum of **5d** (CDCl<sub>3</sub>, 400 MHz)

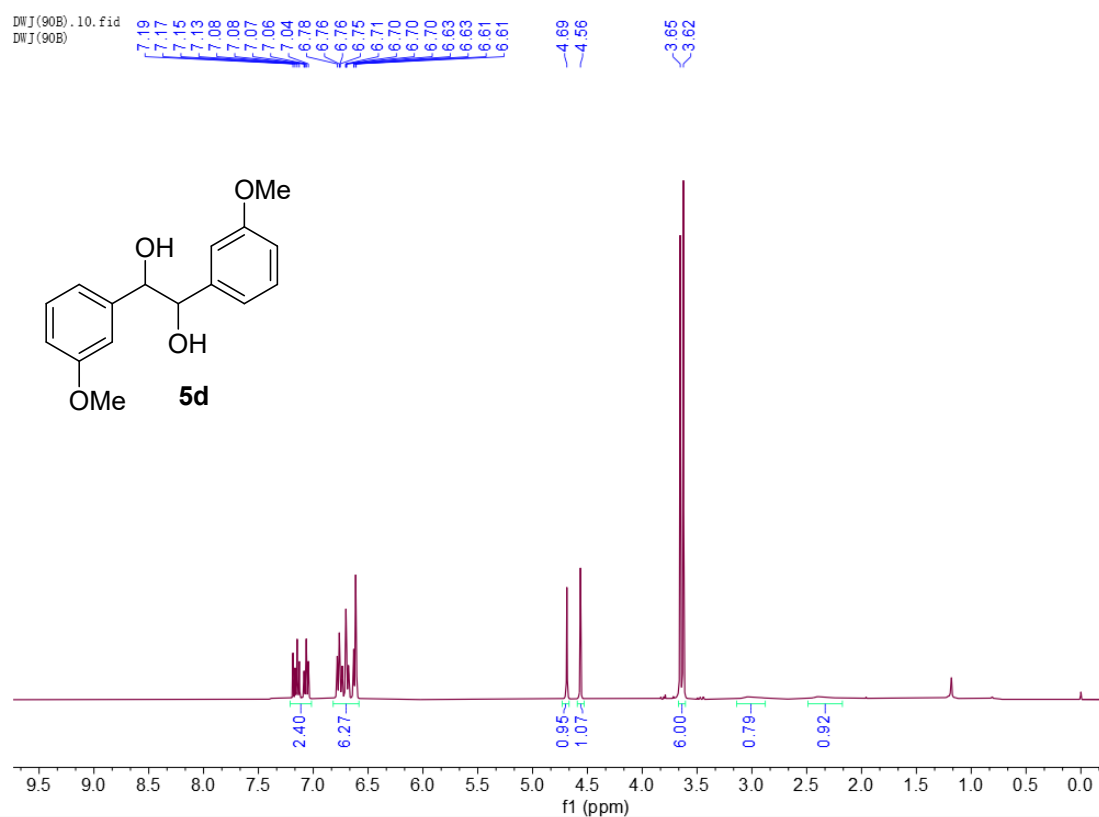

<sup>13</sup>C-NMR spectrum of **5d** (CDCl<sub>3</sub>, 100 MHz)

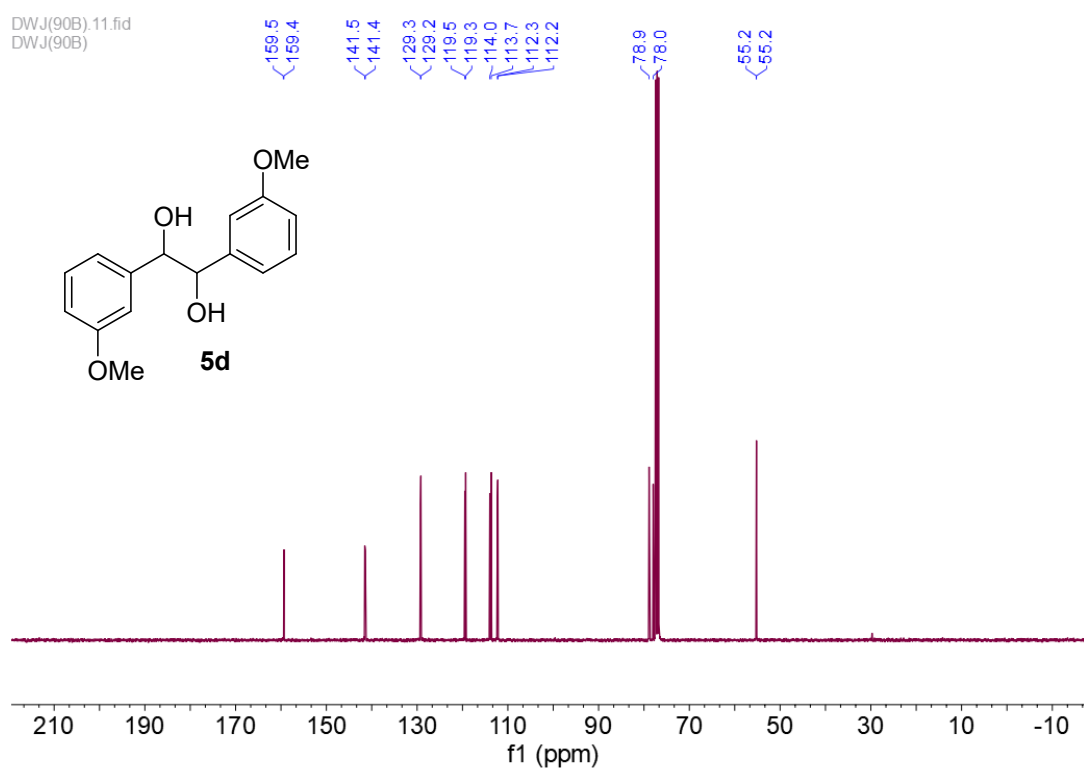

<sup>1</sup>H-NMR spectrum of **5e** (CDCl<sub>3</sub>, 400 MHz)

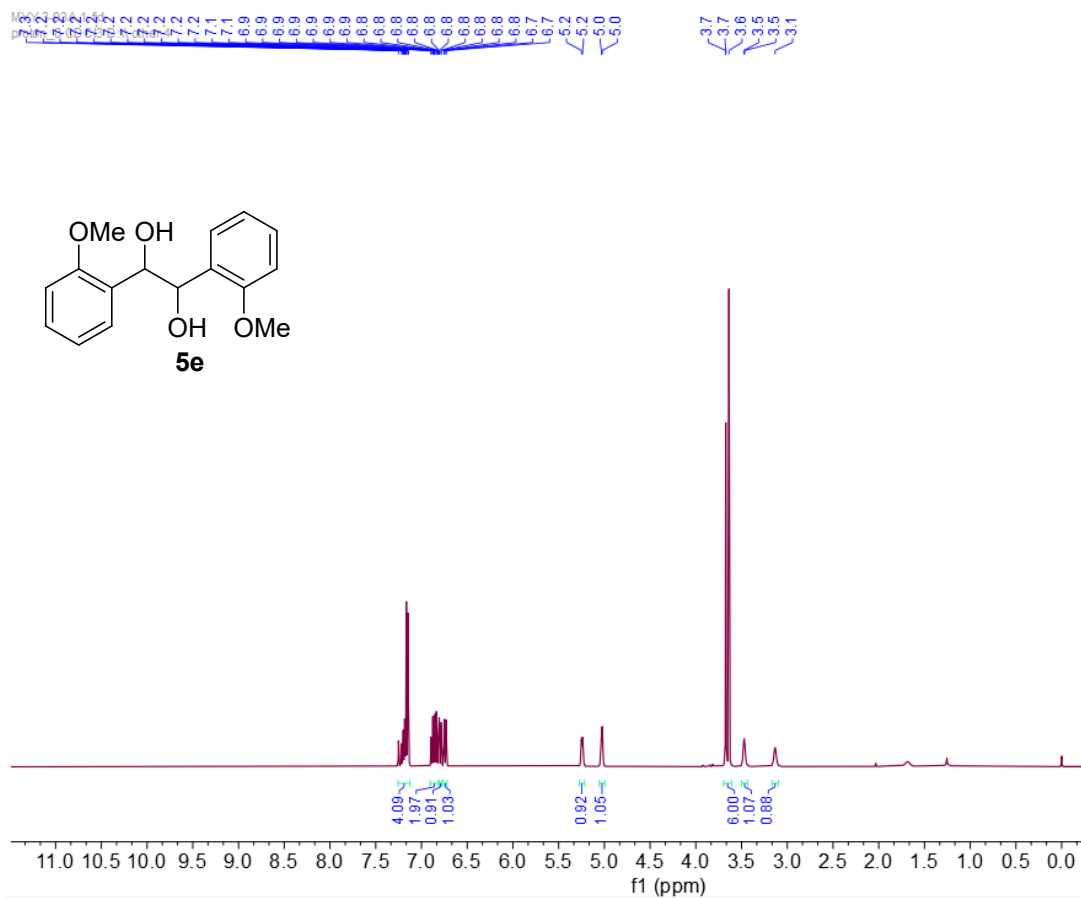

<sup>13</sup>C-NMR spectrum of **5e** (CDCl<sub>3</sub>, 100 MHz)

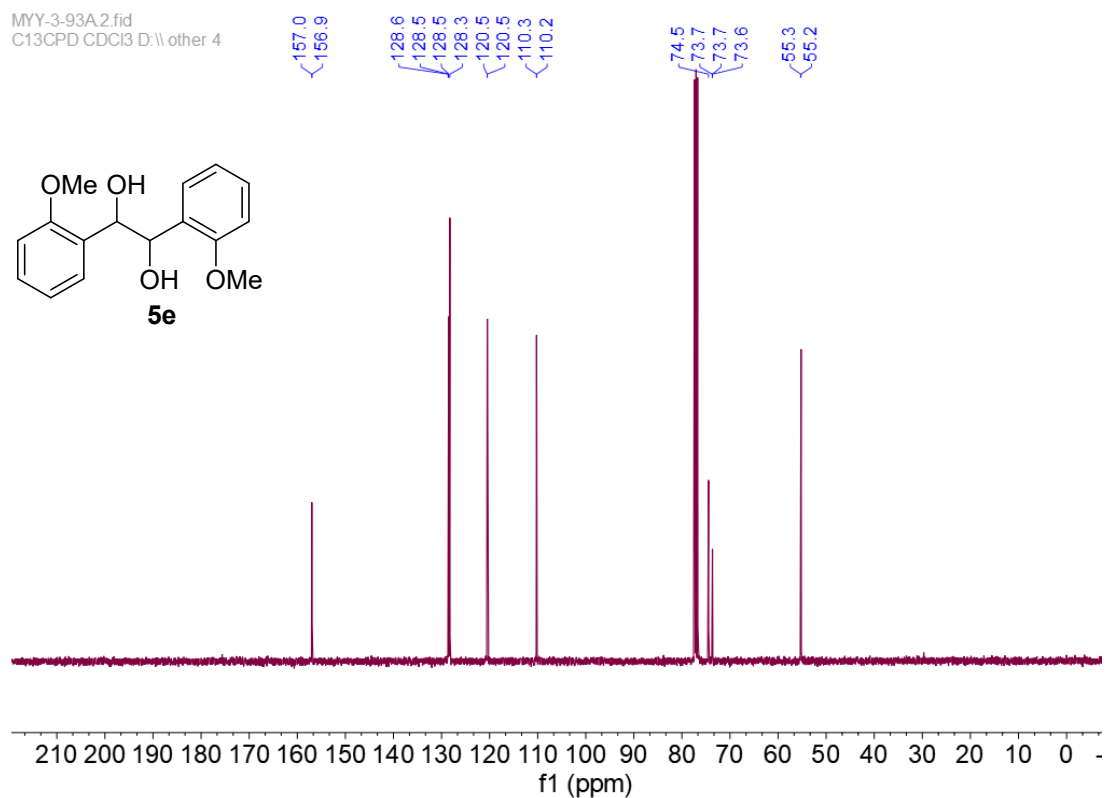

# $^1\text{H-NMR}$ spectrum of **5f** ( $\text{CDCl}_3$ , 400 MHz)

MYY-3-91B.2.fid  
proton\_8\_CDCl3 D:\other 18

7.6  
7.6  
7.5  
7.5  
7.4  
7.4  
7.3  
7.3  
7.3  
7.2

—4.8

—2.9

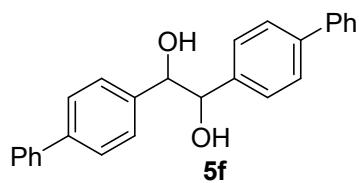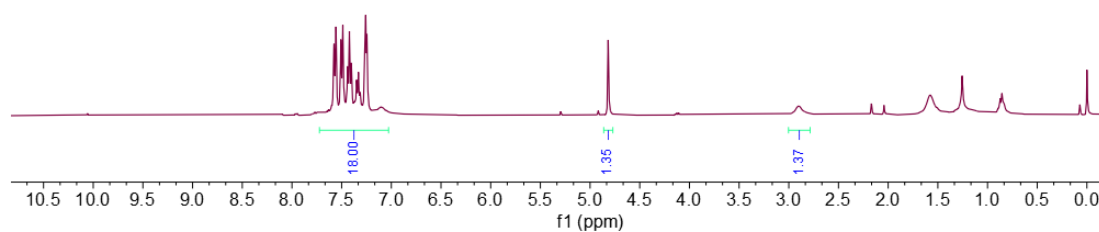

# $^{13}\text{C-NMR}$ spectrum of **5f** ( $\text{CDCl}_3$ , 100 MHz)

MYY-3-91B.3.fid  
C13CPD CDCl3 D:\other 18

140.8  
140.6  
138.9  
128.8  
127.4  
127.4  
127.0  
126.9

—78.8

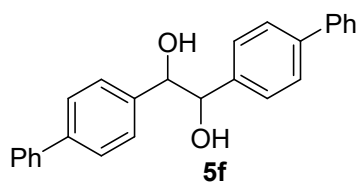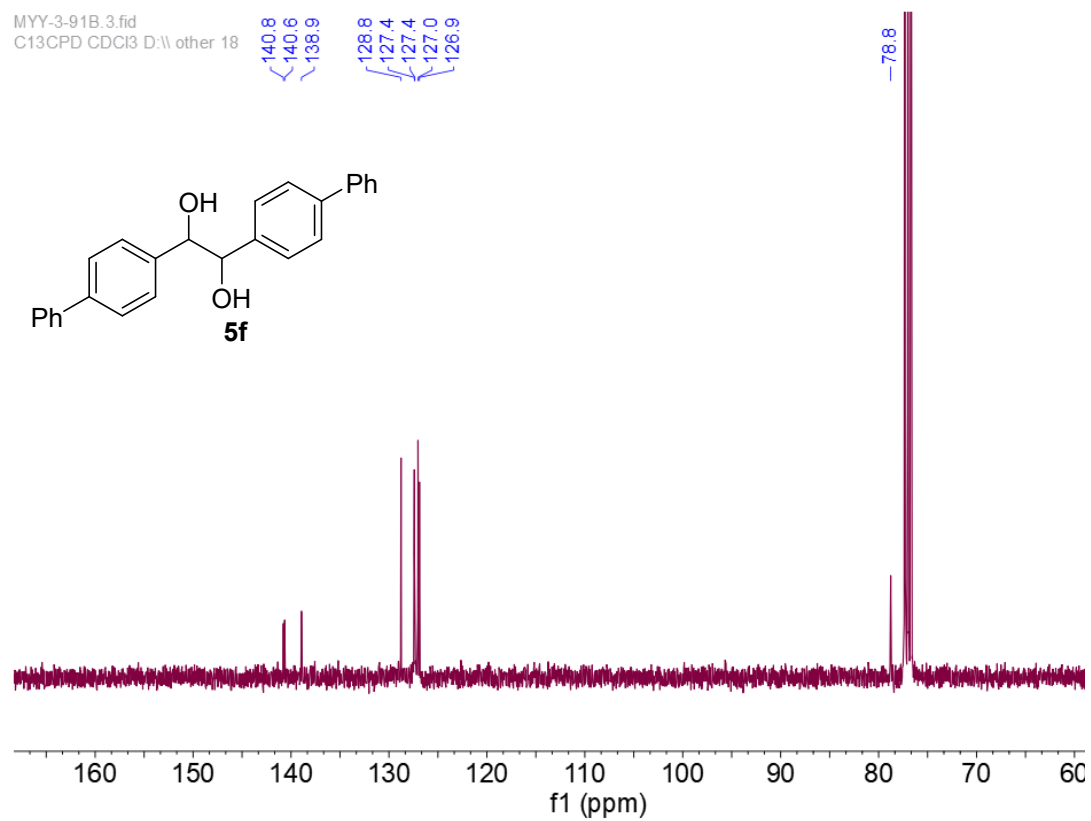

<sup>1</sup>H-NMR spectrum of **5g** (CDCl<sub>3</sub>, 400 MHz)

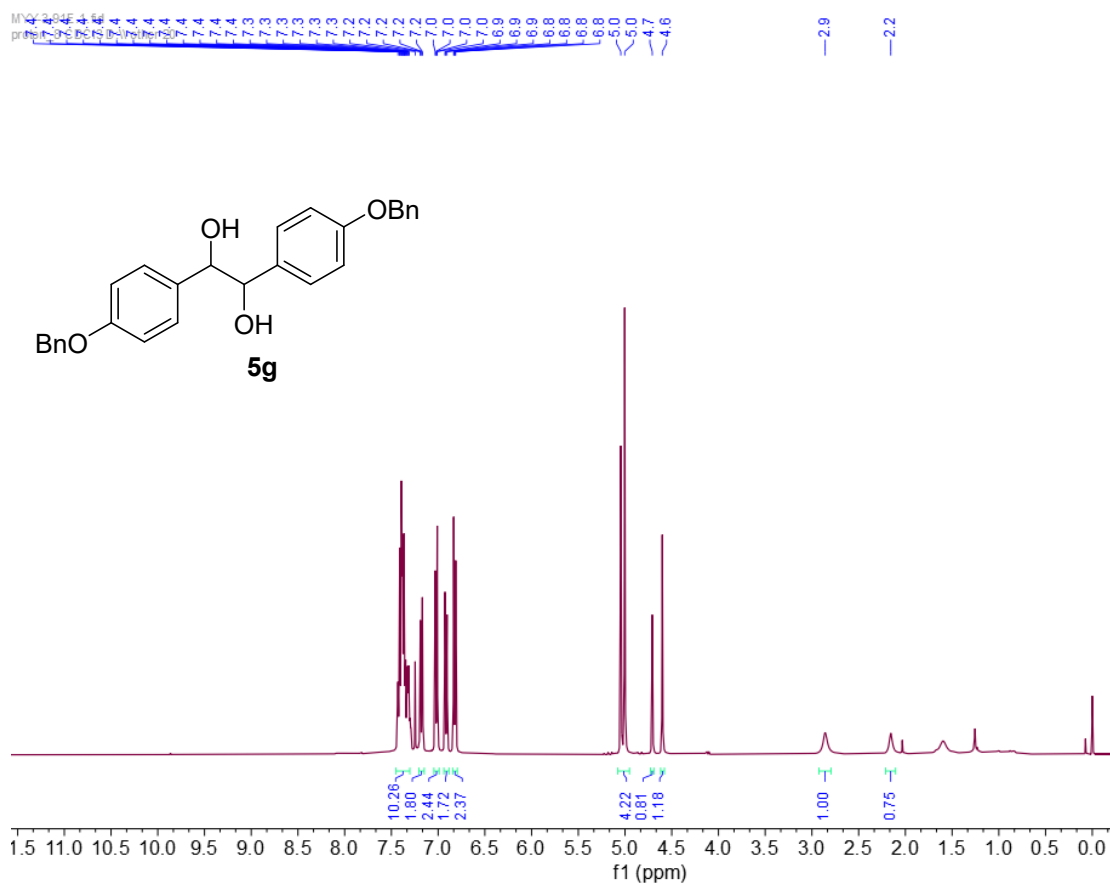

<sup>13</sup>C-NMR spectrum of **5g** (CDCl<sub>3</sub>, 100 MHz)

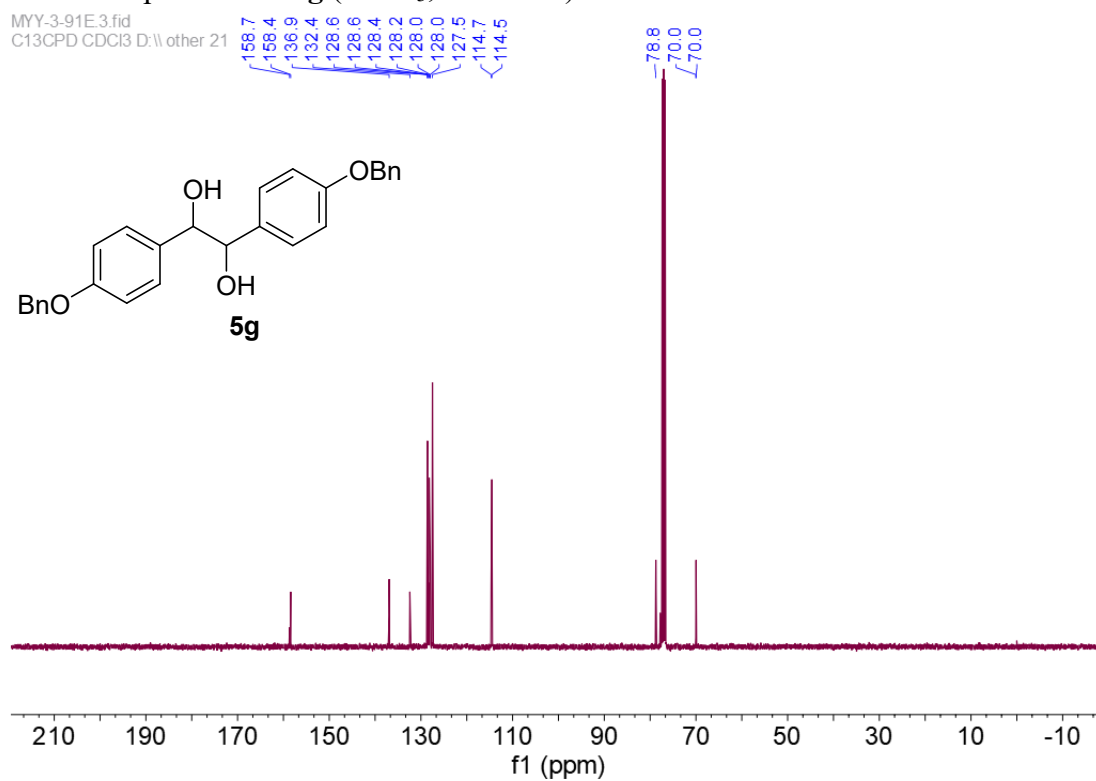

<sup>1</sup>H-NMR spectrum of **5h** (CDCl<sub>3</sub>, 400 MHz)

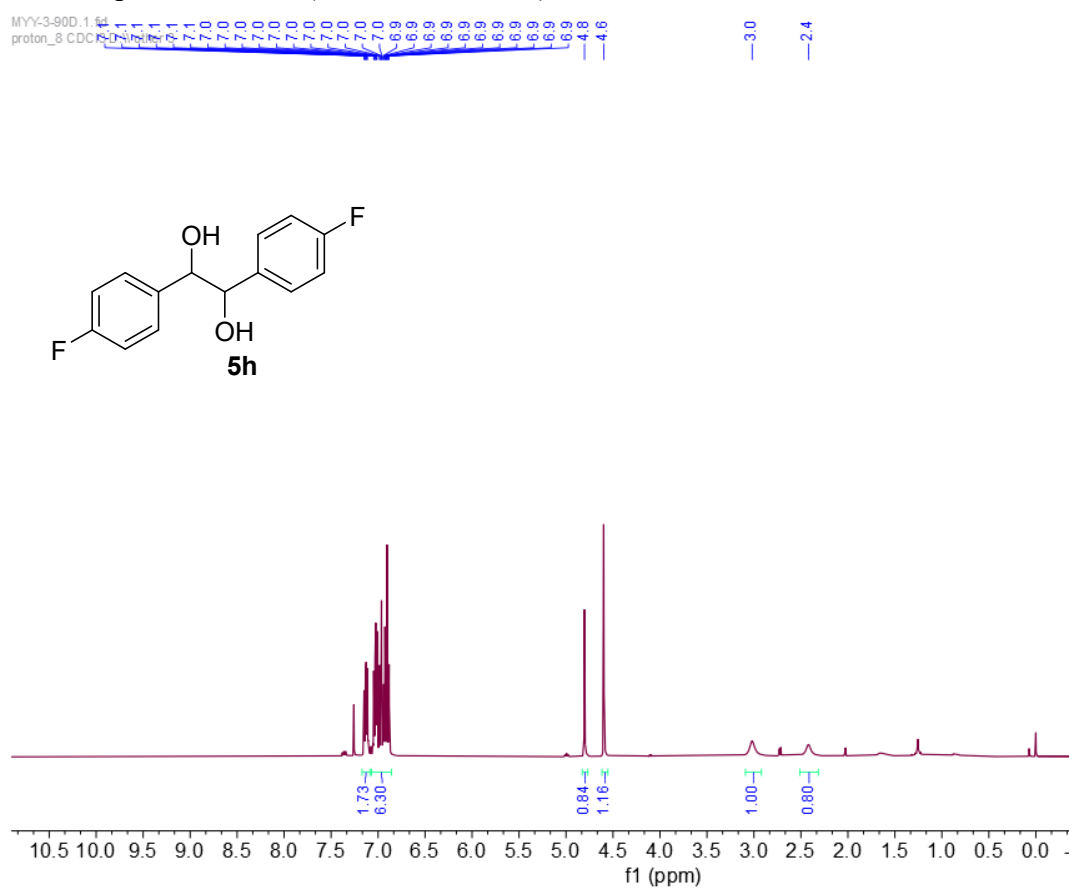

<sup>19</sup>F-NMR spectrum of **5h** (CDCl<sub>3</sub>, 376 MHz)

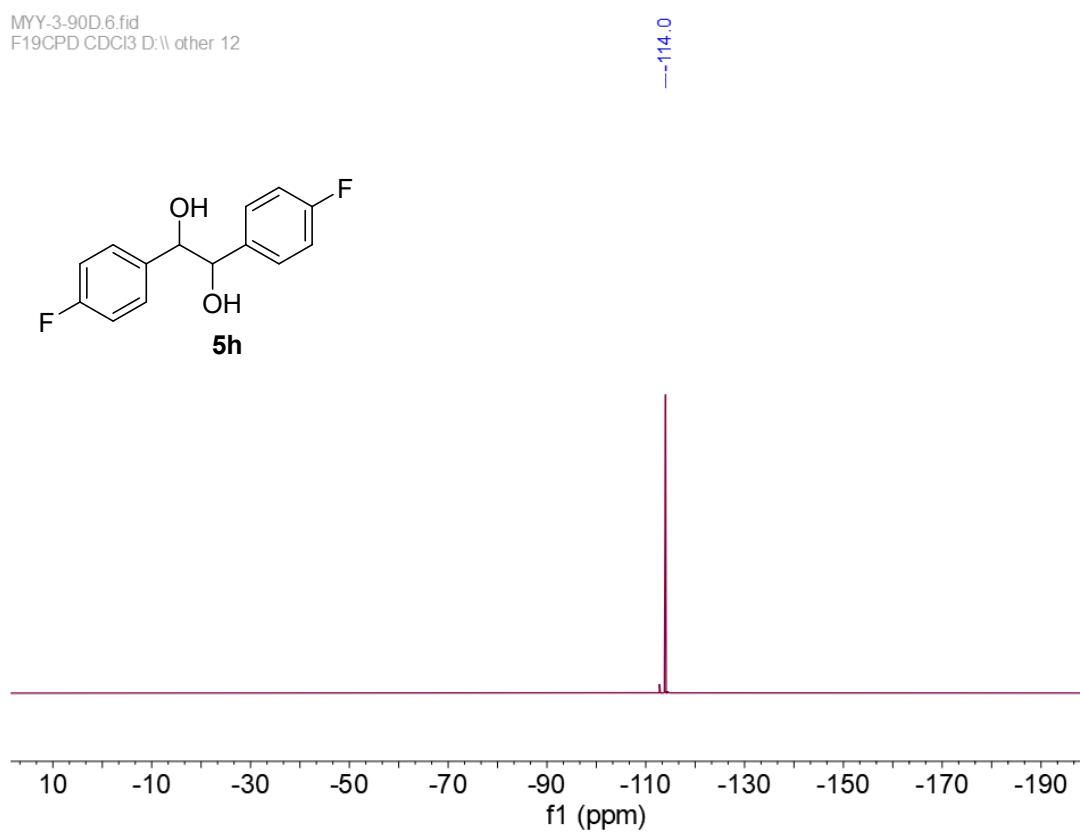



### $^{13}\text{C}$ -NMR spectrum of **5h** ( $\text{CDCl}_3$ , 100 MHz)

MYY-3-90D.2.fid  
C13CPD CDC13 D:\other 24

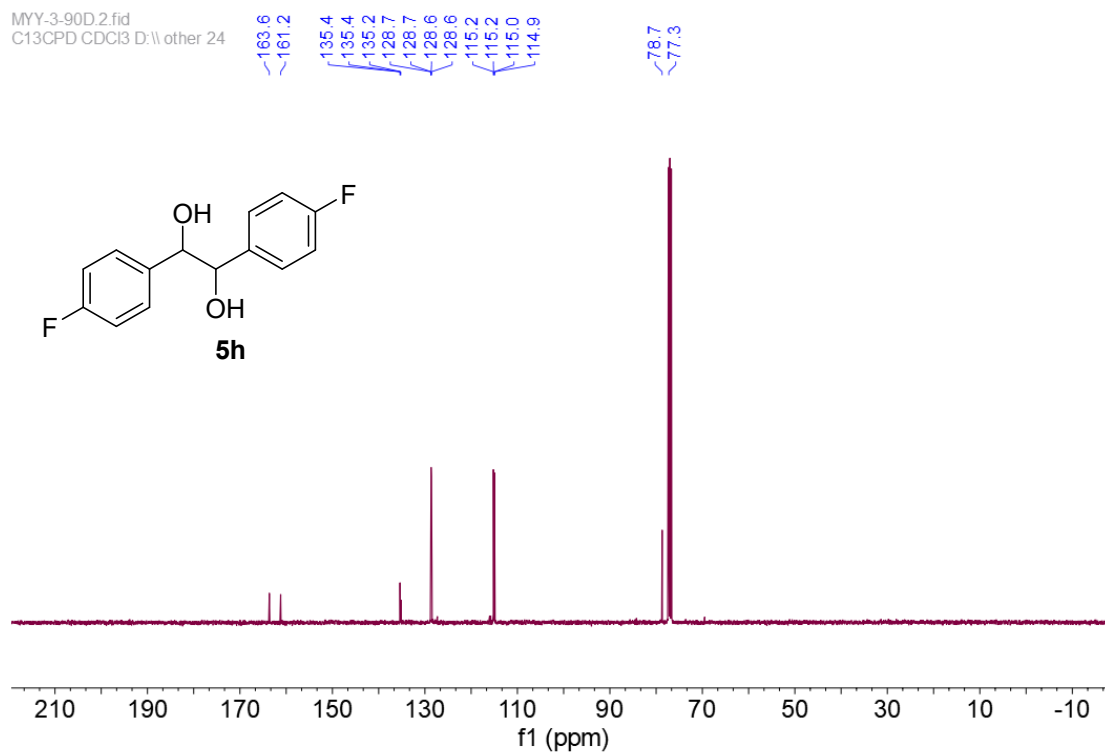

### $^1\text{H}$ -NMR spectrum of **5i** ( $\text{CDCl}_3$ , 400 MHz)

MYY-3-93D.5.fid  
proton\_8 CDC13 D:\other 14

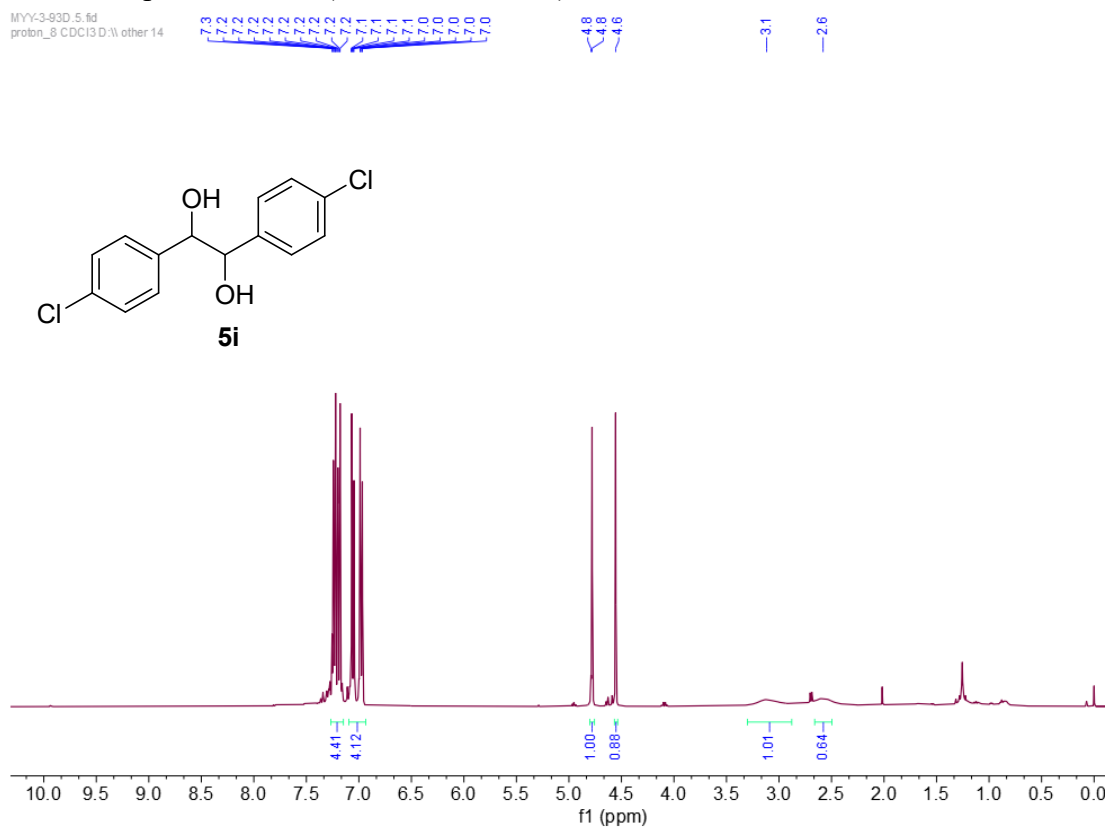

<sup>13</sup>C-NMR spectrum of **5i** (CDCl<sub>3</sub>, 100 MHz)

MYY-3-93D.4.fid  
C13CPD CDCl3 D:\other 15

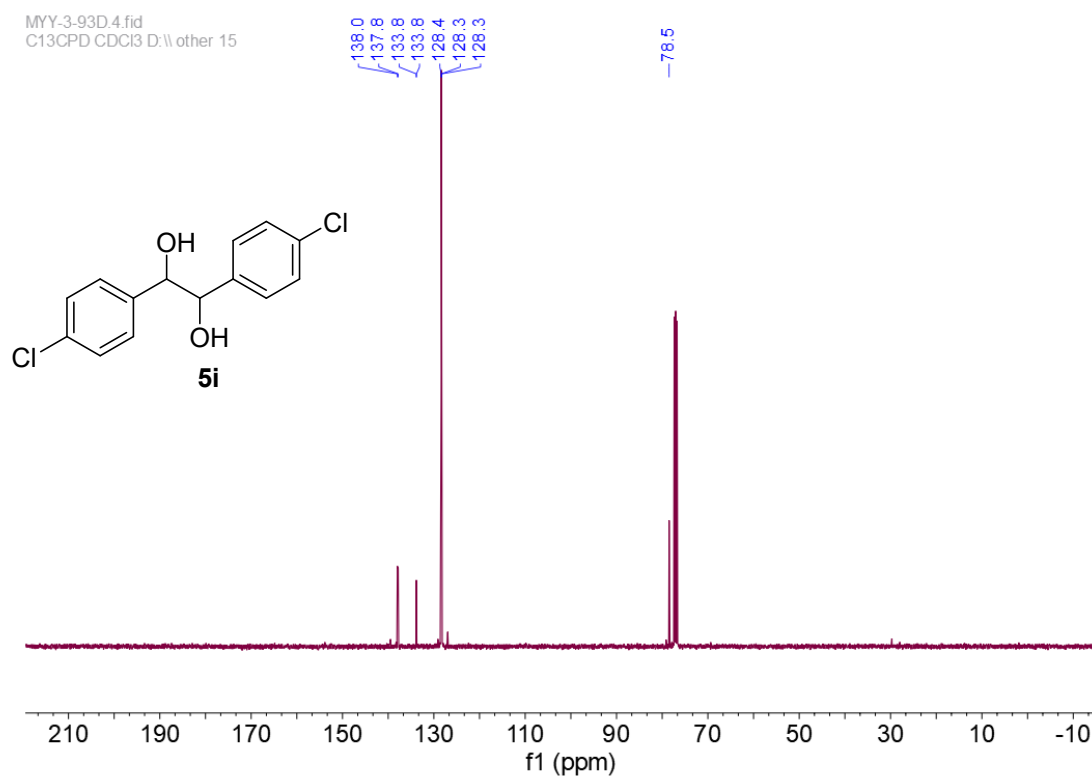

<sup>1</sup>H-NMR spectrum of **5j** (CDCl<sub>3</sub>, 400 MHz)

MYY-3-93E.1.fid  
proton\_8 CDCl3 D:\other 18

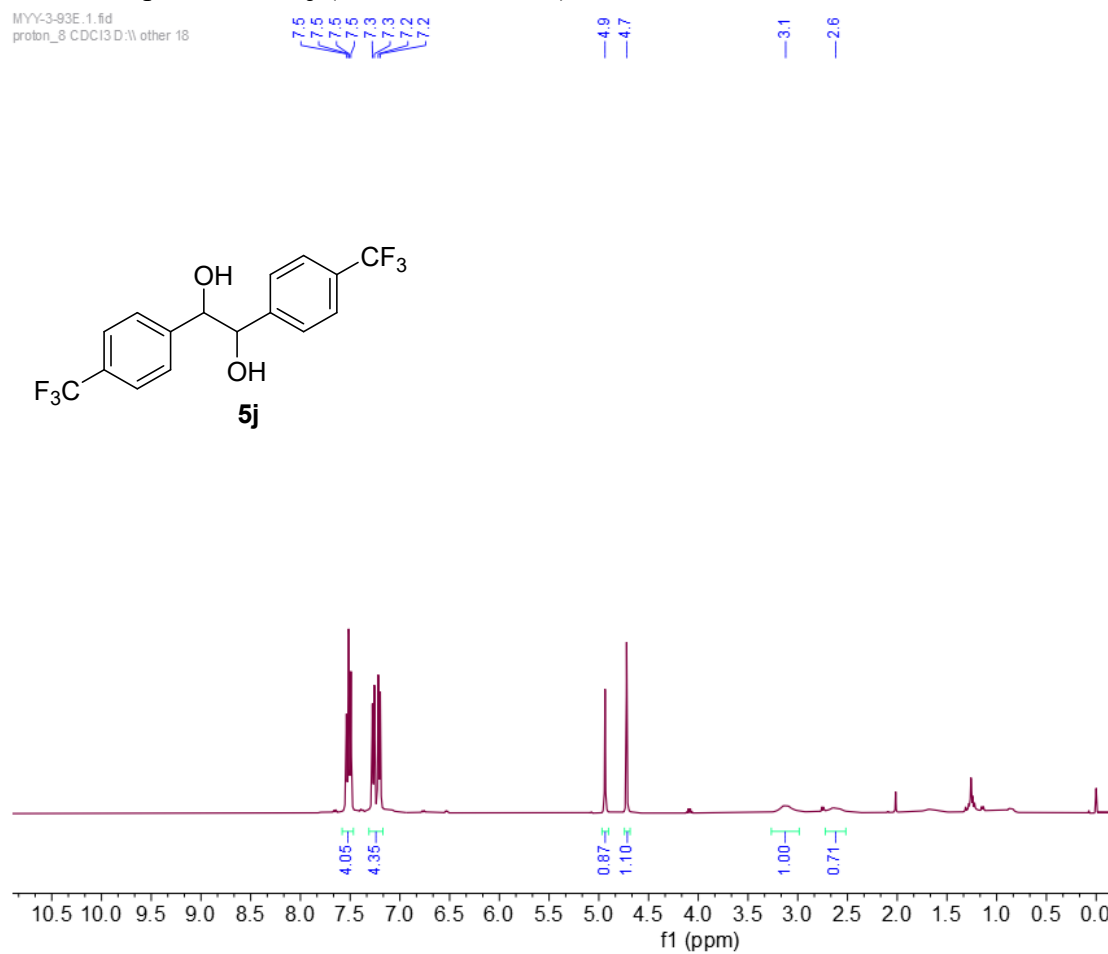

<sup>19</sup>F-NMR spectrum of **5j** (CDCl<sub>3</sub>, 376 MHz)

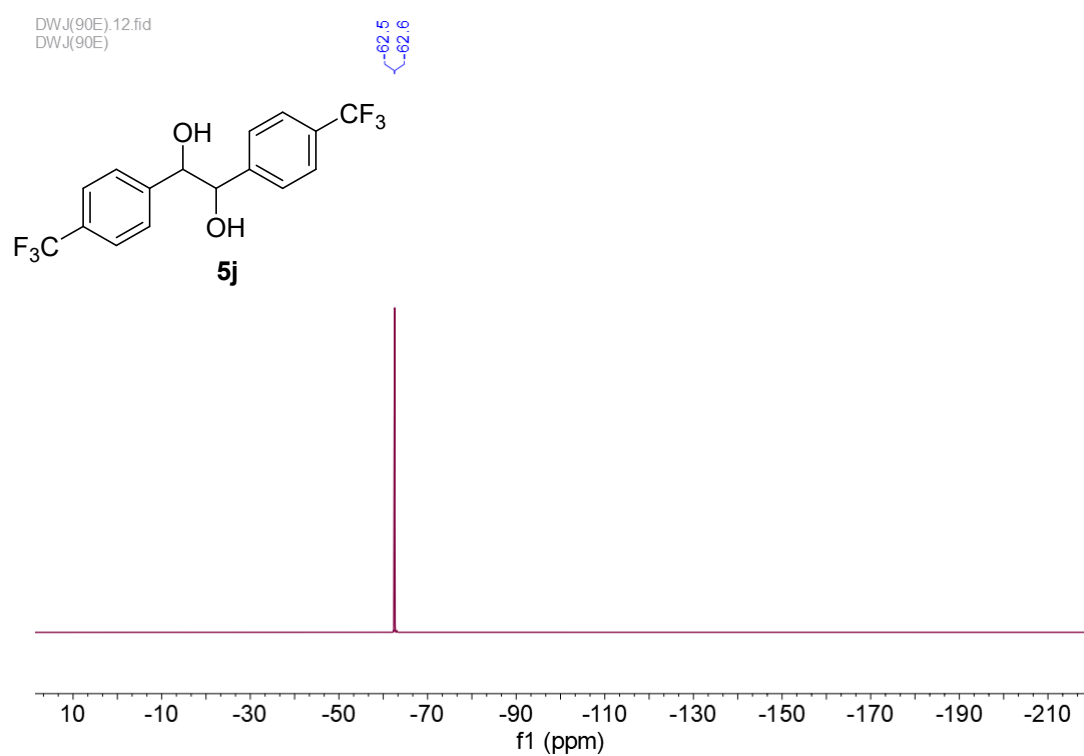

<sup>13</sup>C-NMR spectrum of **5j** (CDCl<sub>3</sub>, 100 MHz)

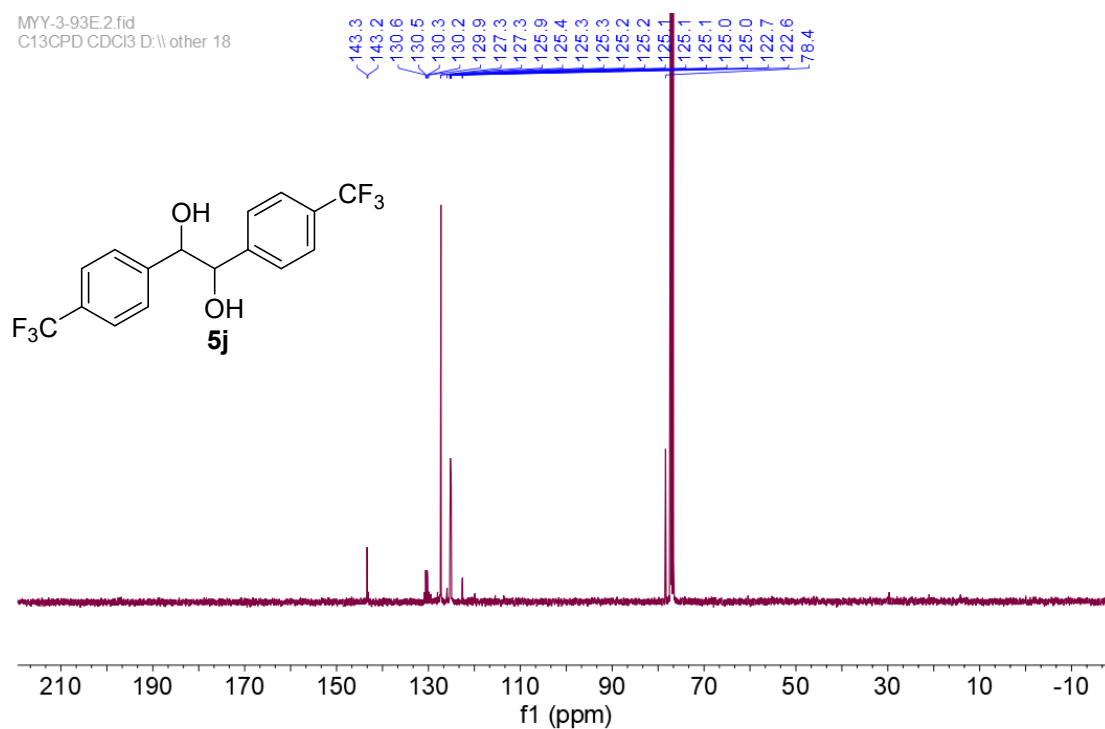

<sup>1</sup>H-NMR spectrum of **5k** (CDCl<sub>3</sub>, 400 MHz)

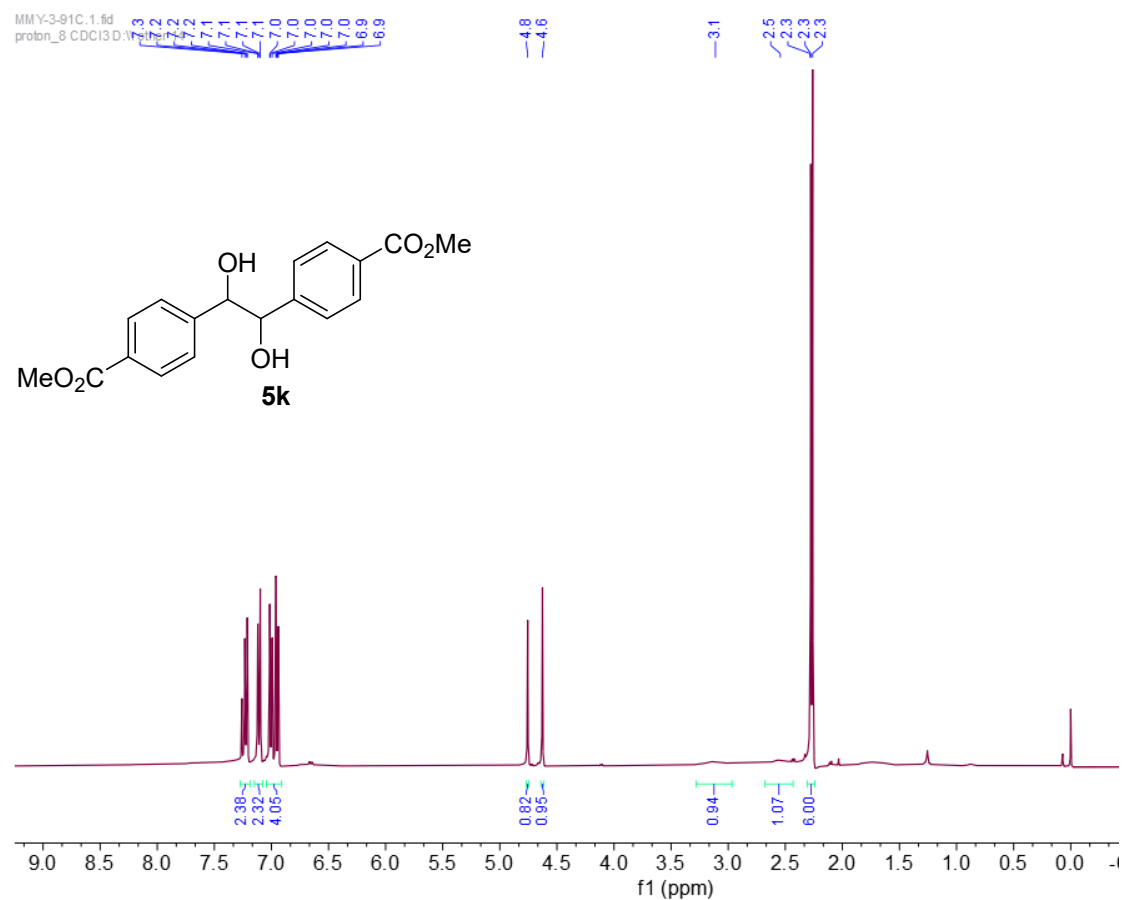

<sup>13</sup>C-NMR spectrum of **5k** (CDCl<sub>3</sub>, 100 MHz)

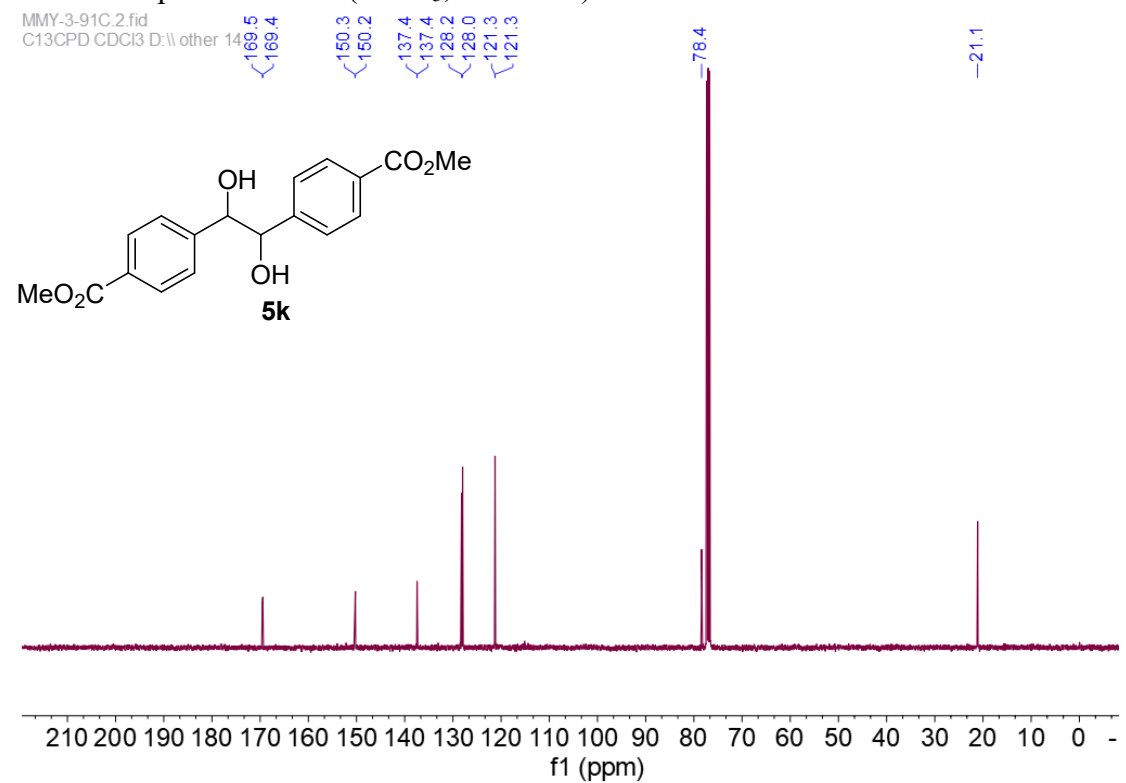

### <sup>1</sup>H-NMR spectrum of **5I** (CDCl<sub>3</sub>, 400 MHz)

MYY-3-93H.1.fid  
proton\_8 CDCl3 D:\other 4

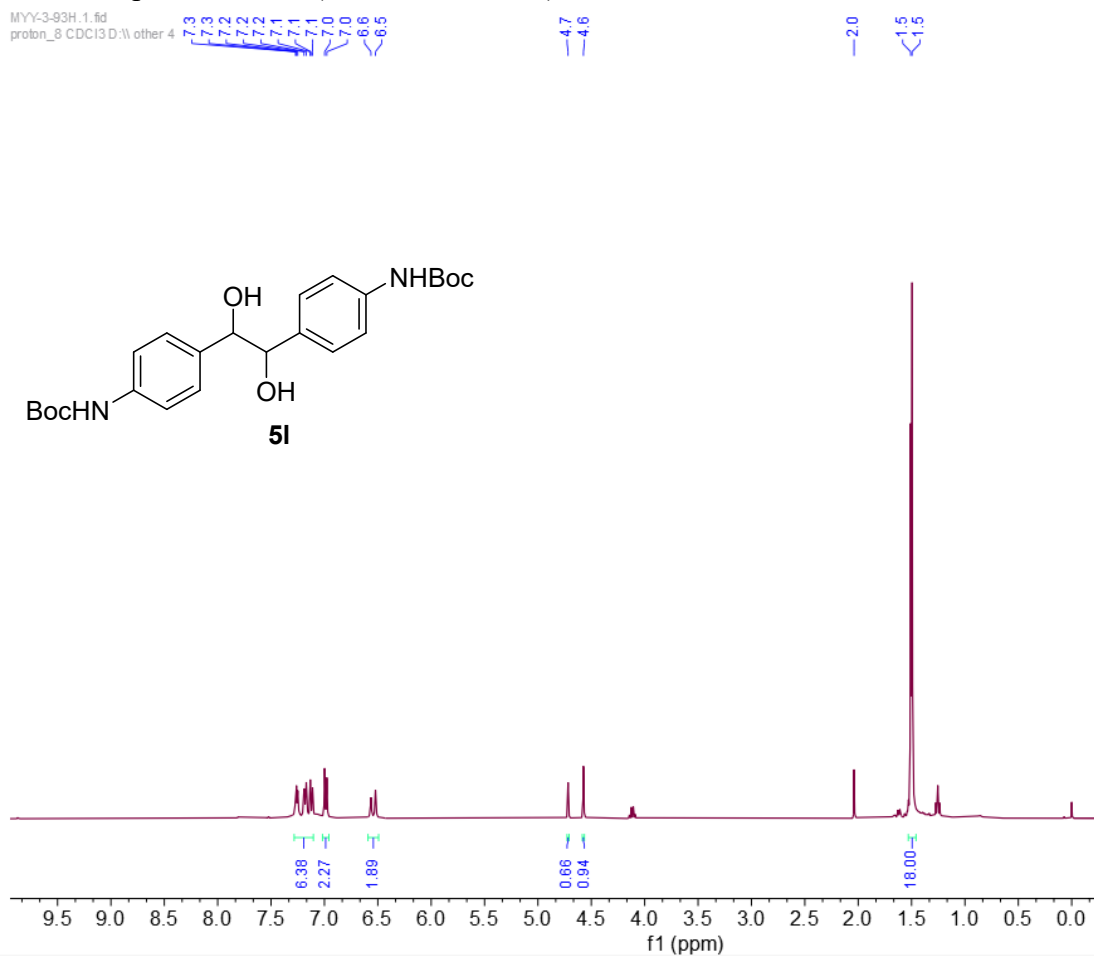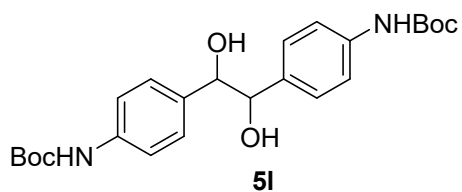

### <sup>13</sup>C-NMR spectrum of **5I** (CDCl<sub>3</sub>, 100 MHz)

MYY-3-93H.5.fid  
C13CPD CDCl3 D:\other 18

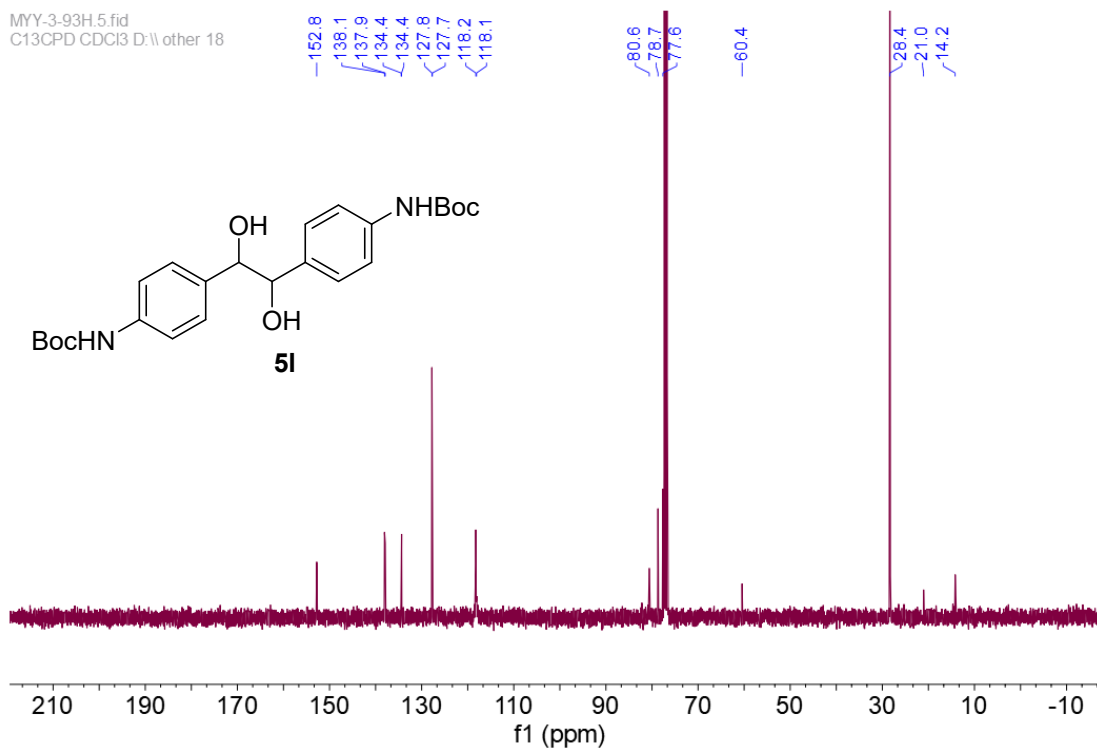

<sup>1</sup>H-NMR spectrum of **5m** (CDCl<sub>3</sub>, 400 MHz)

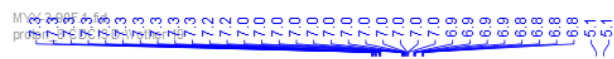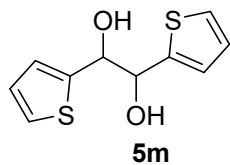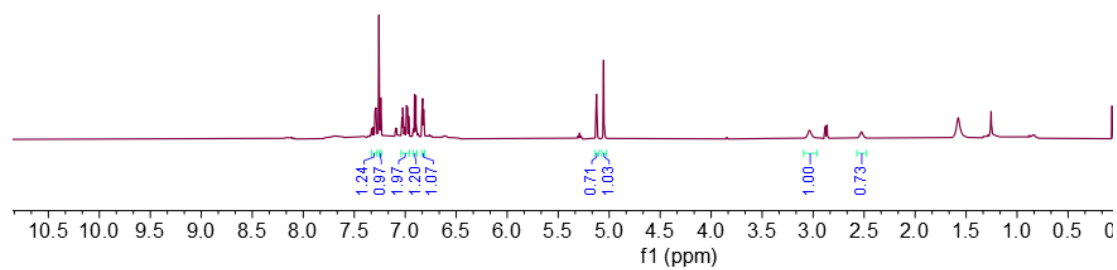

<sup>13</sup>C-NMR spectrum of **5m** (CDCl<sub>3</sub>, 100 MHz)

MY4-S.4.fid  
 C13CPD CDCl3.D:\other 7

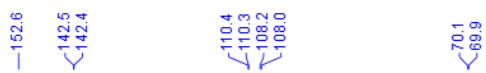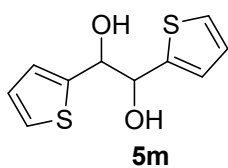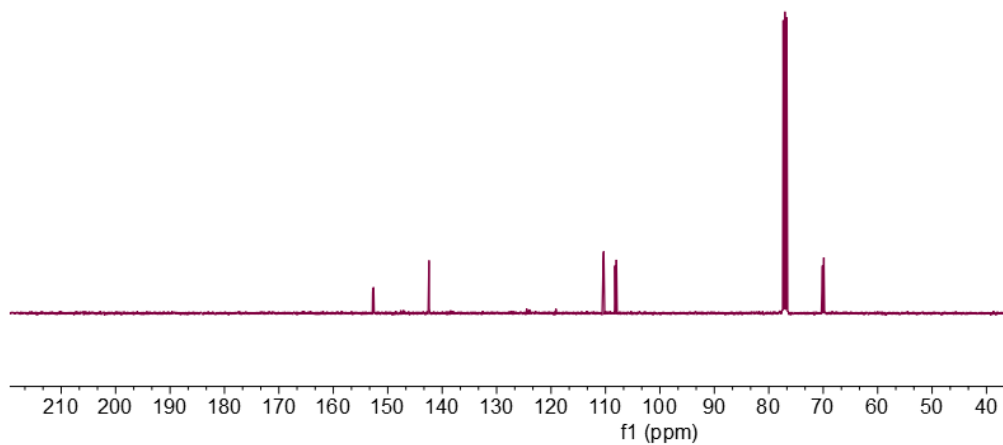

### <sup>1</sup>H-NMR spectrum of **5n** (CDCl<sub>3</sub>, 400 MHz)

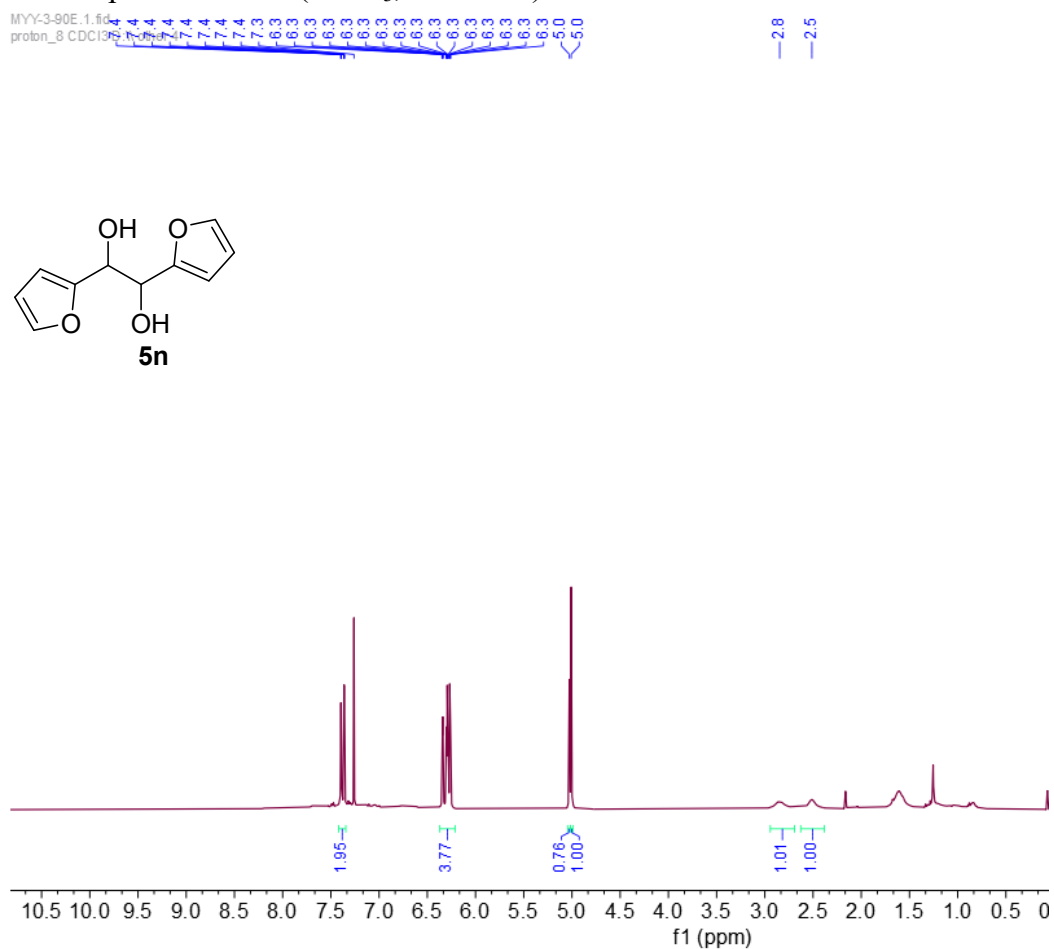

### <sup>13</sup>C-NMR spectrum of **5n** (CDCl<sub>3</sub>, 100 MHz)

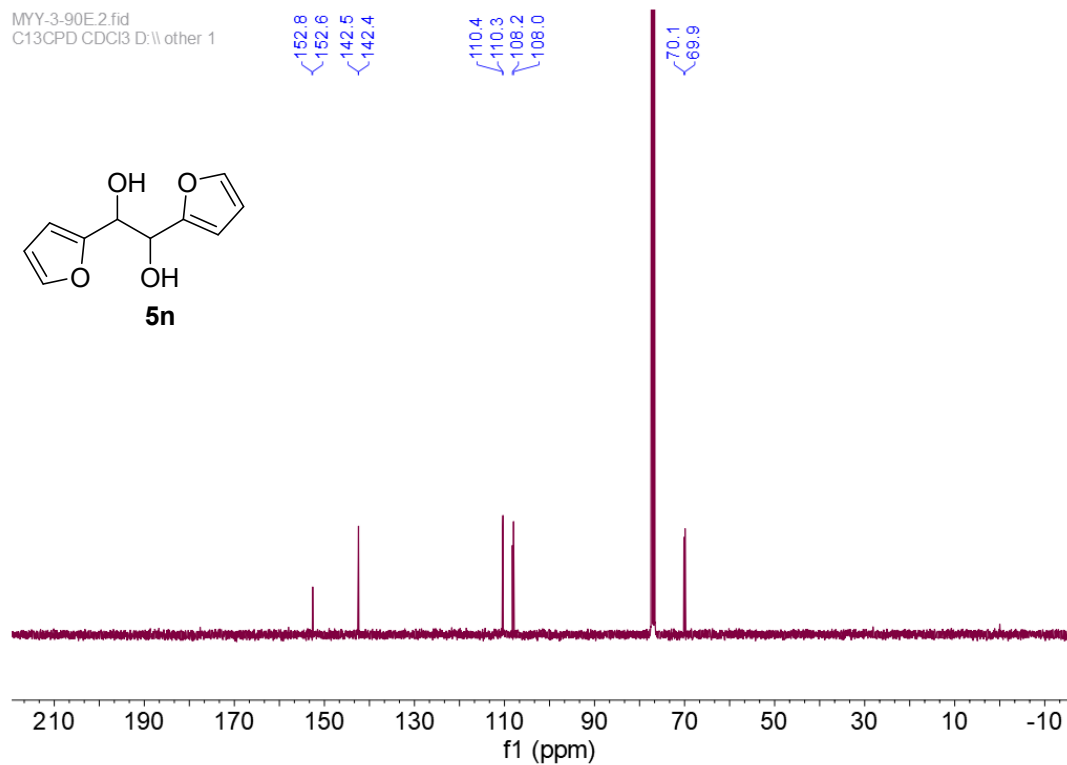

<sup>1</sup>H-NMR spectrum of **5o** (CDCl<sub>3</sub>, 400 MHz)

MYY-3-95A.2.fid  
proton\_8 CDCl3 D:\other 13

6.0  
5.9  
5.9  
5.8  
5.8  
5.7  
5.7  
5.6

3.5  
3.5  
3.3  
3.3

1.9  
1.4  
0.8  
0.8  
0.8  
0.8  
0.5  
0.5

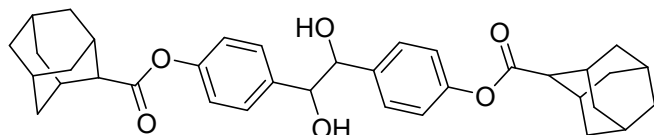

**5o**

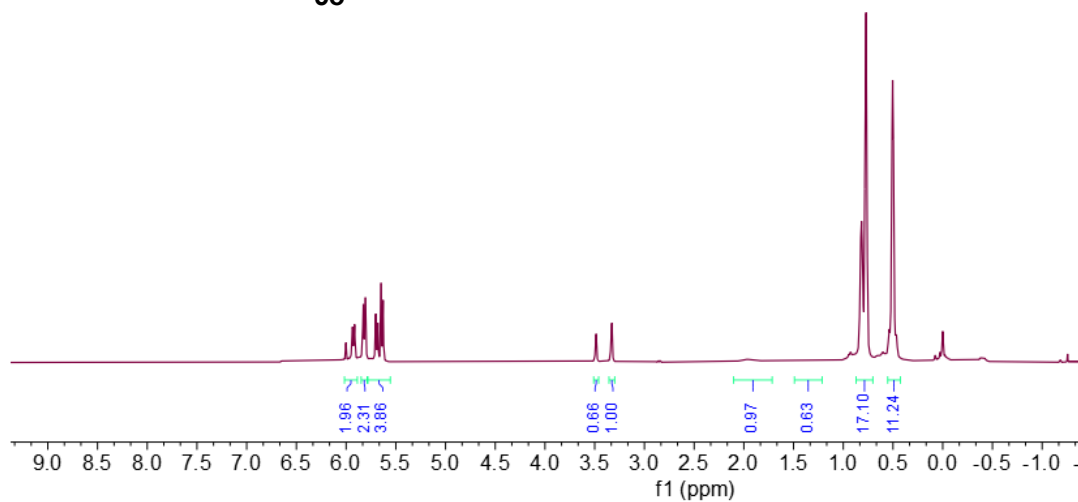

<sup>13</sup>C-NMR spectrum of **5o** (CDCl<sub>3</sub>, 100 MHz)

MYY-3-95A.1.fid  
C13CPD CDCl3 D:\other 10

176.2

137.1  
128.1  
128.0  
121.3

78.5

41.0  
41.0  
38.7  
36.5  
27.9

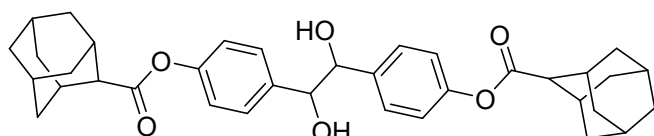

**5o**

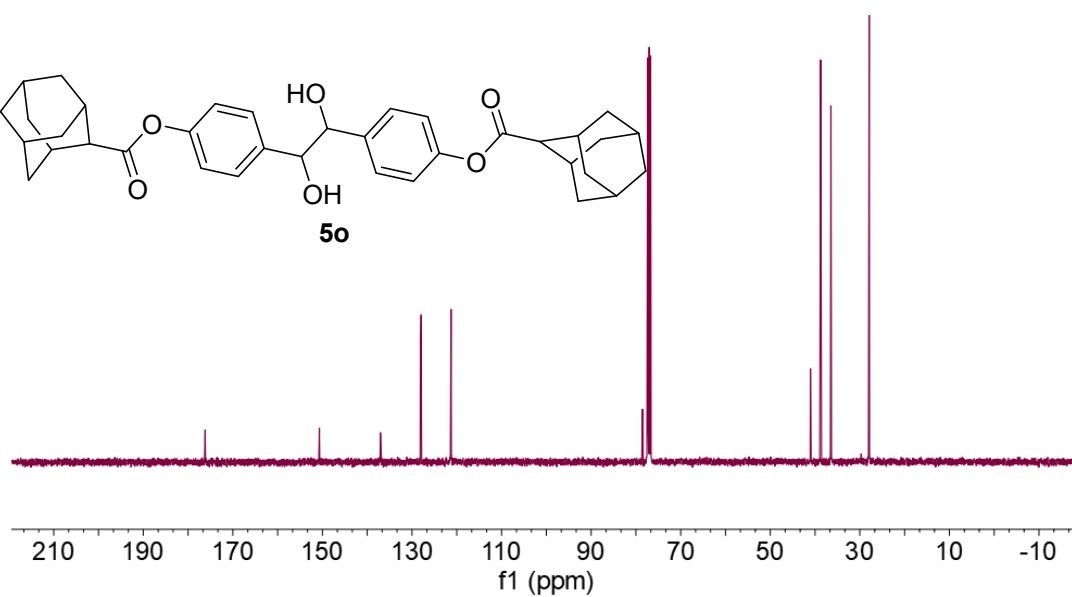

Supplement: d3gc04273a1.pdf [file d3gc04273a1.pdf]
